# Supplementary material for: Direct use of hydroxyl ions as an oxygen source for oxidation of isoquinolinium salts to isoquinolinones in water solution
Source: Royal Society of Chemistry journal article supplement (doi:10.1039/d2nj06140f), 2023-01-01

## Supporting Information

for

### Direct Use of Hydroxyl Ion as an Oxygen Source for Oxidation of Isoquinolinium Salts to Isoquinolinones in Water Solution

Daqian Xu,<sup>\*a</sup> Lixian Wang,<sup>b</sup> Fangzheng Yao,<sup>a</sup> Mingrui Shi,<sup>a</sup> Min Xie,<sup>a</sup> Tao Li,<sup>a</sup> Rong Nie,<sup>a</sup> Hao Gou,<sup>a</sup>

Guohu Zhao,<sup>a</sup> and Wei Sun<sup>\*b</sup>

<sup>a</sup> Provincial Key Laboratory of Gansu Higher Education for City Environmental Pollution Control, School of Chemical Engineering, Lanzhou City University, Lanzhou 730070, China

<sup>b</sup> State Key Laboratory for Oxo Synthesis and Selective Oxidation, Lanzhou Institute of Chemical Physics, Chinese Academy of Sciences, Lanzhou 730000, China

### Table of Contents

|                                                             |     |
|-------------------------------------------------------------|-----|
| 1. General Information                                      | S2  |
| 2. Preparation of N-alkyl iminium salts <b>1</b> & <b>3</b> | S3  |
| 3. Procedure and synthetic application                      | S3  |
| 4. Spectra data of products                                 | S5  |
| 5. Isotope labeling experiment and control experiment       | S16 |
| 6. References                                               | S20 |
| 7. Copies of NMR for <b>2a-2ah</b> and <b>4a-4k</b>         | S21 |

## 1. General Information

Commercially available materials purchased from *Energy Chemical* or TCI was used as received. All the solvents and reagents were obtained from commercial sources and used without purification unless stated otherwise. Nuclear magnetic resonance (NMR) spectra were recorded on a Bruker Avance III 400 MHz spectrometer operating at 400 MHz for  $^1\text{H}$  NMR and 100 MHz for  $^{13}\text{C}$  NMR in deuterated solvent. The chemical shifts ( $\delta$ ) are reported in ppm and coupling constants (J) in Hz.  $^1\text{H}$ NMR splitting patterns are designated as singlet (s), doublet (d), triplet (t), quartet (q), dd (doublet of doublets); m (multiplets), and etc. GC-MS was recorded by an Agilent 7890A/5975C. All first-order splitting patterns were assigned on the basis of the appearance of the multiplet. High resolution mass spectral analysis (HRMS) was performed on a Waters Q-TOF Premier Spectrometer. Column chromatography was generally performed on silica gel (300-400 mesh) and TLC inspections were on silica gel GF<sub>254</sub> plates.

## 2. Preparation of N-alkyl iminium salts 1 & 3

a) General procedure for the preparation of isoquinolinium salts (1a as the example)

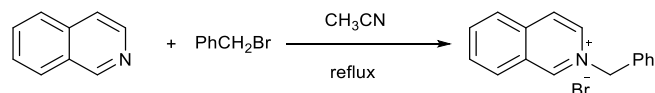

The oven-dried round-bottom flask were charged with  $\text{CH}_3\text{CN}$  (15 mL), isoquinoline (10 mmol, 1.0 equiv.), Benzyl bromide (12 mmol, 1.2 equiv.). The reaction mixture was refluxed for 12 hours, and then cooled to room temperature. When ethyl acetate was added to the system, the isoquinoline salt precipitated quickly as a solid, which was filtered and washed with ethyl acetate to give pure product 1a.

b) General procedure for the preparation of quinolinium salts (3h as the example)

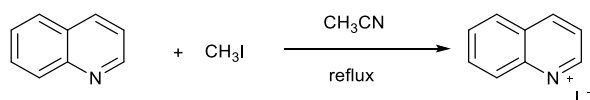

The oven-dried round-bottom flask were charged with  $\text{CH}_3\text{CN}$  (15 mL), quinoline (10 mmol, 1.0 equiv.),  $\text{CH}_3\text{I}$  (12 mmol, 1.2 equiv.). The reaction mixture was refluxed for 12 hours, and then cooled to room temperature. When ethyl acetate was added to the system, the quinoline salt precipitated quickly as a solid, which was filtered and washed with ethyl acetate to give pure product 3h.

## 3. Procedure and synthetic application

a) General procedure for the oxidation of N-alkyl iminium salts.

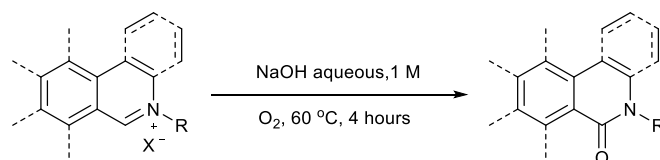

A 10 mL oven-dried screw-capped test tube with stir bar was charged with  $\text{O}_2$ , isoquinolinium salts 1 (0.3 mmol, 1.0 equiv.) and solution of sodium hydroxide (1 M in water) 3 mL, and the mixture was stirred at 60 °C for 4h. Stop the reaction and cool to room temperature, product 2 was deposited as a solid on the stirred magneton or separated from the solution as an oil. The mixture was extract with ethyl acetate (2x5 mL), organic phase was concentrated under vacuum after combine and dry with  $\text{Na}_2\text{SO}_4$ , and purified by column chromatography on silica gel (petroleum ether/ethyl acetate=5:1) to afford desired product 2, which was confirmed by  $^1\text{H}$  NMR,  $^{13}\text{C}$  NMR spectra and compare to already reported data.

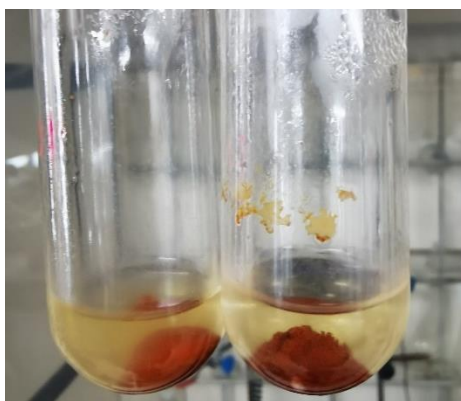

b) Procedure for the scale-up synthesis of product 2k.

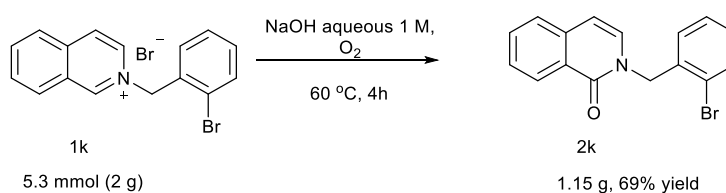

A 100 mL round bottom flask with stir bar was charged with O<sub>2</sub>, isoquinolinium salts **1k** (5.3 mmol, 2 g, 1.0 equiv.) and solution of sodium hydroxide (1 M in water) 30 mL, and the mixture was stirred at 60 °C for 4h. Stop the reaction and cool to room temperature, the mixture was extract with ethyl acetate (3×20 mL), organic phase was concentrated under vacuum after combine and dry with Na<sub>2</sub>SO<sub>4</sub>, and purified by column chromatography on silica gel (petroleum ether/ethyl acetate=5:1) to afford **2k** with 69 % yield.

c) Synthetic application: Synthesis of topoisomerase I inhibitor **5**.<sup>[1]</sup>

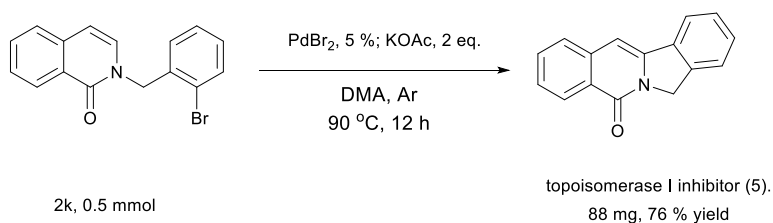

A dry 10 mL Schlenk tube with stir bar was charged with **2k** (0.50 mmol, 1.0 equiv.), PdBr<sub>2</sub> (6.70 mg, 5 mol %), KOAc (98 mg, 2.0 equiv.). The tube was evacuated, and refilled with Argon. Then the mixture was dissolved with 3mL DMA. The mixture was stirred at 90 °C for 15 h when the substrate was consumed completely (monitored by TLC). The mixture was concentrated under vacuum and purified by column chromatography on silica gel (Ethyl acetate dichloromethane 1:1) to afford desired product **5** as a yellow solid (88 mg, 76 % yield)

#### 4. Spectra data of products

##### *N*-benzylisoquinolin-1(2H)-one (2a) <sup>[1]</sup>

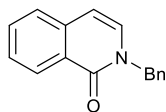

The reaction was performed according to procedure (a). white solid (51 mg, 72%). <sup>1</sup>H NMR (400 MHz, CDCl<sub>3</sub>) δ 8.47 (d, *J* = 7.6 Hz, 1H), 7.67 – 7.58 (m, 1H), 7.52 – 7.43 (m, 2H), 7.33 – 7.25 (m, 5H), 7.08 (d, *J* = 7.4 Hz, 1H), 6.48 (d, *J* = 7.4 Hz, 1H), 5.22 (s, 2H). <sup>13</sup>C NMR (101 MHz, CDCl<sub>3</sub>) δ 162.2, 137.0, 136.9, 132.2, 131.3, 128.8, 128.1, 127.9, 127.8, 126.9, 126.3, 125.9, 106.4, 51.7.

##### *N*-(4-methylbenzyl)isoquinolin-1(2H)-one (2b) <sup>[3]</sup>

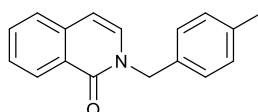

The reaction was performed according to procedure (a). white solid (55mg, 74%). <sup>1</sup>H NMR (400 MHz, CDCl<sub>3</sub>) δ 8.51 – 8.37 (m, 1H), 7.71 – 7.55 (m, 1H), 7.50 – 7.38 (m, 2H), 7.32 – 7.17 (m, 2H), 7.11 (d, *J* = 7.9 Hz, 2H), 7.04 (d, *J* = 7.4 Hz, 1H), 6.43 (d, *J* = 7.4 Hz, 1H), 5.15 (s, 2H), 2.29 (s, 3H). <sup>13</sup>C NMR (101 MHz, CDCl<sub>3</sub>) δ 162.2, 137.6, 137.0, 133.9, 132.2, 131.3, 129.5, 128.0, 128.0, 126.8, 126.3, 125.9, 106.3, 51.4, 21.1.

##### *N*-(4-bromobenzyl)isoquinolin-1(2H)-one (2c) <sup>[2]</sup>

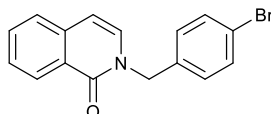

The reaction was performed according to procedure (a). white solid (63.8mg, 68%). <sup>1</sup>H NMR (400 MHz, CDCl<sub>3</sub>) δ 8.36 (d, *J* = 7.7 Hz, 1H), 7.70 – 7.48 (m, 1H), 7.44 – 7.38 (m, 2H), 7.37 – 7.32 (m, 2H), 7.13 – 7.04 (m, 2H), 6.97 (d, *J* = 7.4 Hz, 1H), 6.40 (d, *J* = 7.4 Hz, 1H), 5.06 (s, 2H). <sup>13</sup>C NMR (101 MHz, CDCl<sub>3</sub>) δ 162.2, 136.9, 135.9, 132.4, 131.9, 131.1, 129.6, 128.0, 127.0, 126.2, 126.04, 121.8, 106.7, 51.3.

##### *N*-(4-fluorobenzyl)isoquinolin-1(2H)-one (2d) <sup>[3]</sup>

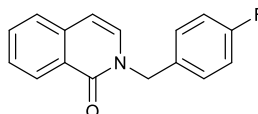

The reaction was performed according to procedure (a). White solid (49 mg, 65%). <sup>1</sup>H NMR (400 MHz, CDCl<sub>3</sub>) δ 8.45 (d, *J* = 7.8 Hz, 1H), 7.78 – 7.59 (m, 1H), 7.49 (dd, *J* = 11.3, 4.3 Hz, 2H), 7.39 – 7.28 (m, 2H), 7.08 (d, *J* = 7.4 Hz, 1H), 7.04 – 6.96 (m, 2H), 6.50 (d, *J* = 7.4 Hz, 1H), 5.18 (s, 2H). <sup>13</sup>C NMR (101 MHz, CDCl<sub>3</sub>) δ 163.6, 162.2, 161.1, 136.9, 132.7, 132.7, 132.3, 131.1, 129.8, 129.7, 128.0, 127.0, 126.3, 125.9, 115.8, 115.6, 106.6, 51.1.

##### *N*-(4-(trifluoromethyl)benzyl)isoquinolin-1(2H)-one (2e) <sup>[11]</sup>

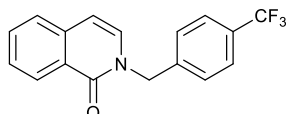

The reaction was performed according to procedure (a). White solid (57mg, 63%)  $^1\text{H}$  NMR (400 MHz,  $\text{CDCl}_3$ )  $\delta$  8.45 (d,  $J = 7.9$  Hz, 1H), 7.73 – 7.62 (m, 1H), 7.59 (d,  $J = 8.1$  Hz, 2H), 7.52 (t,  $J = 8.3$  Hz, 2H), 7.43 (d,  $J = 8.1$  Hz, 2H), 7.09 (d,  $J = 7.4$  Hz, 1H), 6.54 (d,  $J = 7.4$  Hz, 1H), 5.27 (s, 2H).  $^{13}\text{C}$  NMR (101 MHz,  $\text{CDCl}_3$ )  $\delta$  162.2, 140.9, 137.0, 132.5, 131.1, 128.0, 128.0, 127.1, 126.2, 126.0, 125.8, 125.7, 106.8, 51.5.

*N*-((1-oxoisoquinolin-2(1H)-yl)methyl)benzonitrile (**2f**)<sup>[2]</sup>

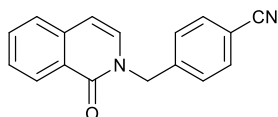

The reaction was performed according to procedure (a). Yellow solid (25 mg, 32%)  $^1\text{H}$  NMR (400 MHz,  $\text{CDCl}_3$ )  $\delta$  8.33 (d,  $J = 8.1$  Hz, 1H), 7.60 – 7.53 (m, 1H), 7.53 – 7.48 (m, 2H), 7.46 – 7.37 (m, 2H), 7.31 (d,  $J = 8.2$  Hz, 2H), 7.00 (d,  $J = 7.4$  Hz, 1H), 6.45 (d,  $J = 7.4$  Hz, 1H), 5.15 (s, 2H).  $^{13}\text{C}$  NMR (101 MHz,  $\text{CDCl}_3$ )  $\delta$  162.2, 142.2, 137.0, 132.6, 132.5, 131.1, 128.3, 127.9, 127.2, 126.1, 126.1, 118.6, 111.6, 107.0, 51.7.

*N*-(4-(tert-butyl)benzyl)isoquinolin-1(2H)-one (**2g**)<sup>[8]</sup>

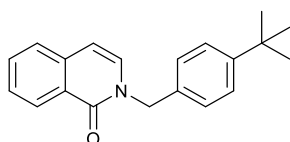

The reaction was performed according to procedure (a). White solid (63.5mg, 73%)  $^1\text{H}$  NMR (400 MHz,  $\text{CDCl}_3$ )  $\delta$  8.38 (d,  $J = 7.7$  Hz, 1H), 7.59 – 7.47 (m, 1H), 7.39 (dd,  $J = 11.3, 4.3$  Hz, 2H), 7.32 – 7.24 (m, 2H), 7.18 (d,  $J = 8.5$  Hz, 2H), 7.02 (d,  $J = 7.4$  Hz, 1H), 6.39 (d,  $J = 7.4$  Hz, 1H), 5.11 (s, 2H), 1.20 (s, 9H).  $^{13}\text{C}$  NMR (101 MHz,  $\text{CDCl}_3$ )  $\delta$  162.2, 150.8, 137.0, 133.8, 132.2, 131.4, 128.0, 127.7, 126.8, 126.3, 125.9, 125.7, 106.3, 51.4, 34.5, 31.3.

*N*-(3-methylbenzyl)isoquinolin-1(2H)-one (**2h**)<sup>[3]</sup>

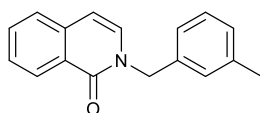

The reaction was performed according to procedure (a). yellow solid (45mg, 61%)  $^1\text{H}$  NMR (400 MHz,  $\text{CDCl}_3$ )  $\delta$  8.60 – 8.34 (m, 1H), 7.62 (td,  $J = 7.3, 1.3$  Hz, 1H), 7.53 – 7.38 (m, 2H), 7.22 (dd,  $J = 15.4, 7.9$  Hz, 1H), 7.15 – 7.00 (m, 4H), 6.47 (d,  $J = 7.4$  Hz, 1H), 5.18 (s, 2H), 2.31 (s, 3H).  $^{13}\text{C}$  NMR (101 MHz,  $\text{CDCl}_3$ )  $\delta$  162.2, 138.5, 137.0, 136.8, 132.2, 131.3, 128.7, 128.6, 128.6, 128.1, 126.8, 126.3, 125.9, 125.0, 106.4, 51.6, 21.4.

*N*-(3-chlorobenzyl)isoquinolin-1(2H)-one (**2i**)<sup>[10]</sup>

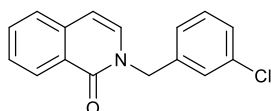

The reaction was performed according to procedure (a). yellow solid (43.5mg, 54%)  $^1\text{H}$  NMR (400 MHz,  $\text{CDCl}_3$ )  $\delta$  8.36 (d,  $J = 7.8$  Hz, 1H), 7.55 (ddd,  $J = 8.1, 7.1, 1.3$  Hz, 1H), 7.46 – 7.34 (m, 2H), 7.21-7.15 (m, 3H), 7.13 – 7.09 (m, 1H), 6.97 (d,  $J = 7.4$  Hz, 1H), 6.41 (d,  $J = 7.4$  Hz, 1H), 5.08 (s, 2H).  $^{13}\text{C}$  NMR (101 MHz,  $\text{CDCl}_3$ )  $\delta$  162.2, 138.9, 137.0, 134.6, 132.4, 131.1, 130.2, 128.0, 127.9, 127.0, 126.2, 126.0, 106.7, 51.2.

*N*-(2-methylbenzyl)isoquinolin-1(2H)-one (2j)<sup>[3]</sup>

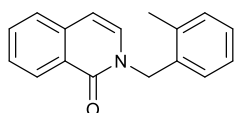

The reaction was performed according to procedure (a). yellow solid (46.2mg, 62%) <sup>1</sup>H NMR (400 MHz, CDCl<sub>3</sub>) δ 8.48 (d, *J* = 7.8 Hz, 1H), 7.73 – 7.55 (m, 1H), 7.49 (dd, *J* = 11.4, 4.4 Hz, 2H), 7.22 – 7.11 (m, 3H), 7.05 (d, *J* = 7.5 Hz, 1H), 6.94 (d, *J* = 7.4 Hz, 1H), 6.47 (d, *J* = 7.4 Hz, 1H), 5.22 (s, 2H), 2.31 (s, 3H). <sup>13</sup>C NMR (101 MHz, CDCl<sub>3</sub>) δ 162.2, 136.9, 136.5, 134.4, 132.2, 130.8, 130.7, 128.3, 128.1, 128.0, 126.9, 126.3, 126.1, 125.9, 106.3, 49.3, 19.2.

*N*-(2-bromobenzyl)isoquinolin-1(2H)-one (2k)<sup>[1]</sup>

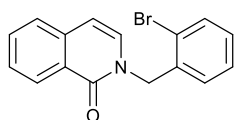

The reaction was performed according to procedure (a). White solid (62mg, 67%) <sup>1</sup>H NMR (400 MHz, CDCl<sub>3</sub>) δ 8.47 (d, *J* = 8.0 Hz, 1H), 7.69 – 7.62 (m, 1H), 7.59 (dd, *J* = 5.9, 3.4 Hz, 1H), 7.54 – 7.45 (m, 2H), 7.25 – 7.20 (m, 1H), 7.16-7.12 (m, 2H), 7.10 (d, *J* = 7.4 Hz, 1H), 5.32 (s, 2H). <sup>13</sup>C NMR (101 MHz, CDCl<sub>3</sub>) δ 162.3, 137.0, 135.9, 132.9, 132.4, 131.5, 129.4, 129.3, 128.1, 127.9, 127.0, 126.2, 126.0, 123.3, 106.5, 51.7.

*N*-((perfluorophenyl)methyl)isoquinolin-1(2H)-one (2l)

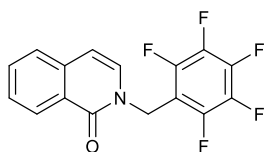

The reaction was performed according to procedure (a). White solid (66mg, 68%) <sup>1</sup>H NMR (400 MHz, CDCl<sub>3</sub>) δ 8.30 (d, *J* = 8.0 Hz, 1H), 7.74 – 7.52 (m, 1H), 7.49 – 7.31 (m, 2H), 7.12 (d, *J* = 7.4 Hz, 1H), 6.46 (d, *J* = 7.4 Hz, 1H), 5.13 (s, 2H). <sup>13</sup>C NMR (101 MHz, CDCl<sub>3</sub>) δ 161.9, 136.9, 132.6, 131.3, 127.7, 127.2, 126.0, 125.9, 106.7, 41.4. Calcd for C<sub>16</sub>H<sub>9</sub>F<sub>5</sub>NO [M+H]<sup>+</sup>: 326.0599, found: 326.1602.

*N*-(naphthalen-2-ylmethyl)isoquinolin-1(2H)-one (2m)<sup>[8]</sup>

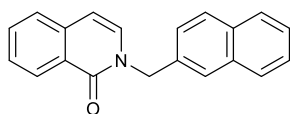

The reaction was performed according to procedure (a). White solid (57.3mg, 74%) <sup>1</sup>H NMR (400 MHz, CDCl<sub>3</sub>) δ 8.49 (d, *J* = 7.9 Hz, 1H), 7.88 – 7.70 (m, 4H), 7.67 – 7.57 (m, 1H), 7.53 – 7.37 (m, 5H), 7.09 (d, *J* = 7.4 Hz, 1H), 6.45 (d, *J* = 7.4 Hz, 1H), 5.36 (s, 2H). <sup>13</sup>C NMR (101 MHz, CDCl<sub>3</sub>) δ 162.4, 137.0, 134.4, 133.3, 132.9, 132.3, 131.2, 128.8, 128.1, 127.8, 127.7, 126.9, 126.9, 126.3, 126.3, 126.1, 126.0, 125.8, 106.6, 51.7.

*N*-bromo-2-(4-bromobenzyl)isoquinolin-1(2H)-one (2n)

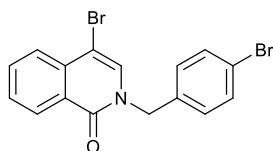

The reaction was performed according to procedure (a). White solid (79mg, 68%)  $^1\text{H}$  NMR (400 MHz,  $\text{CDCl}_3$ )  $\delta$  8.45 (d,  $J = 8.0$  Hz, 1H), 7.93 – 7.68 (m, 2H), 7.64 – 7.50 (m, 1H), 7.45 (d,  $J = 8.4$  Hz, 2H), 7.33 (s, 1H), 7.21 (d,  $J = 8.3$  Hz, 2H), 5.12 (s, 2H).  $^{13}\text{C}$  NMR (101 MHz,  $\text{CDCl}_3$ )  $\delta$  161.3, 135.4, 135.3, 133.2, 132.0, 131.5, 129.7, 128.4, 128.0, 126.4, 125.9, 122.2, 100.4, 51.3. Calcd for  $\text{C}_{16}\text{H}_{12}\text{Br}_2\text{NO}$   $[\text{M}+\text{H}]^+$ : 391.9280, found: 391.9284.

*N*-benzyl-3-methylisoquinolin-1(2H)-one (2o)<sup>[9]</sup>

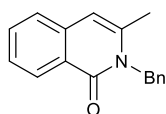

The reaction was performed according to procedure (a). White solid (47mg, 63%)  $^1\text{H}$  NMR (400 MHz,  $\text{CDCl}_3$ )  $\delta$  7.51 (s, 1H), 7.39 (dd,  $J = 7.7, 1.0$  Hz, 1H), 7.30 – 7.21 (m, 1H), 7.20-7.16 (m, 2H), 7.16 – 7.08 (m, 4H), 7.05 (t,  $J = 7.5$  Hz, 1H), 5.47 (s, 2H), 2.23 (d,  $J = 1.1$  Hz, 4H).  $^{13}\text{C}$  NMR (101 MHz,  $\text{CDCl}_3$ )  $\delta$  163.1, 138.6, 136.6, 136.3, 130.0, 129.3, 128.7, 127.9, 127.2, 126.6, 122.1, 121.0, 114.7, 46.2, 17.8.

*N*-benzyl-4-bromoisoquinolin-1(2H)-one (2p)<sup>[8]</sup>

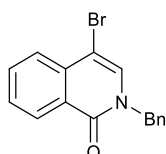

The reaction was performed according to procedure (a). White solid (61 mg, 65%)  $^1\text{H}$  NMR (400 MHz,  $\text{CDCl}_3$ )  $\delta$  8.48 (dd,  $J = 8.0, 0.7$  Hz, 1H), 7.87 – 7.77 (m, 1H), 7.73 (dd,  $J = 8.2, 1.2$  Hz, 1H), 7.59 – 7.51 (m, 1H), 7.41 – 7.29 (m, 6H), 5.20 (s, 2H).  $^{13}\text{C}$  NMR (101 MHz,  $\text{CDCl}_3$ )  $\delta$  161.4, 136.2, 135.4, 133.0, 131.8, 128.9, 128.5, 128.1, 128.1, 127.9, 126.5, 125.9, 100.2, 51.7.

*N*-benzyl-5-bromoisoquinolin-1(2H)-one (2q)<sup>[3]</sup>

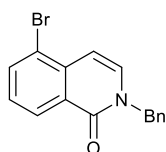

The reaction was performed according to procedure (a). White solid (63mg, 67%)  $^1\text{H}$  NMR (400 MHz,  $\text{CDCl}_3$ )  $\delta$  8.17 (d,  $J = 8.6$  Hz, 1H), 7.49 (s, 1H), 7.42 (d,  $J = 8.6$  Hz, 1H), 7.33 – 7.09 (m, 5H), 6.96 (d,  $J = 7.4$  Hz, 1H), 6.21 (d,  $J = 7.4$  Hz, 1H), 5.05 (s, 2H).  $^{13}\text{C}$  NMR (101 MHz,  $\text{CDCl}_3$ )  $\delta$  161.7, 138.4, 136.6, 132.7, 130.1, 129.9, 128.9, 128.3, 128.0, 128.0, 127.3, 124.9, 105.2, 51.8.

*N*-benzyl-6-bromoisoquinolin-1(2H)-one (2r)<sup>[3]</sup>

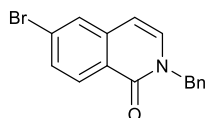



The reaction was performed according to procedure (a). White solid (62mg, 66%)  $^1\text{H}$  NMR (400 MHz,  $\text{CDCl}_3$ )  $\delta$  8.33 (d,  $J = 8.1$  Hz, 1H), 7.76 (dd,  $J = 7.7, 1.1$  Hz, 1H), 7.31 – 7.17 (m, 6H), 7.07 (d,  $J = 7.7$  Hz, 1H), 6.71 (d,  $J = 7.7$  Hz, 1H), 5.11 (s, 2H).  $^{13}\text{C}$  NMR (101 MHz,  $\text{CDCl}_3$ )  $\delta$  161.4, 136.4, 136.3, 136.0, 132.5, 128.9, 128.0, 128.0, 127.8, 127.7, 127.4, 120.6, 105.0, 51.9.

*N*-benzyl-1-oxo-1,2-dihydroisoquinoline-4-carbonitrile (**2s**)

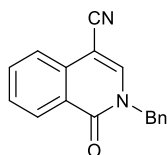

The reaction was performed according to procedure (a). yellow solid (51mg, 66%)  $^1\text{H}$  NMR (400 MHz,  $\text{CDCl}_3$ )  $\delta$  8.35 (d,  $J = 8.1$  Hz, 1H), 7.69 (d,  $J = 3.9$  Hz, 2H), 7.63 (s, 1H), 7.51 (dt,  $J = 8.2, 4.1$  Hz, 1H), 7.38 – 7.20 (m, 5H), 5.14 (s, 2H).  $^{13}\text{C}$  NMR (101 MHz,  $\text{CDCl}_3$ )  $\delta$  161.2, 140.1, 135.3, 133.7, 133.3, 129.2, 128.7, 128.6, 128.5, 128.3, 125.2, 124.1, 115.7, 91.3, 52.3. Calcd for  $\text{C}_{17}\text{H}_{13}\text{N}_2\text{O}$   $[\text{M}+\text{H}]^+$ : 261.1028, found: 261.1022.

*N*-benzyl-5-nitroisoquinolin-1(2H)-one (**2t**)

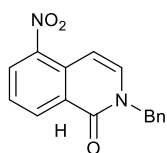

The reaction was performed according to procedure (a). White solid (27 mg, 32%)  $^1\text{H}$  NMR (400 MHz,  $\text{CDCl}_3$ )  $\delta$  8.70 (d,  $J = 8.0$  Hz, 1H), 8.30 (d,  $J = 7.9$  Hz, 1H), 7.47 (t,  $J = 8.0$  Hz, 1H), 7.37 – 7.12 (m, 7H), 5.14 (s, 2H).  $^{13}\text{C}$  NMR (101 MHz,  $\text{CDCl}_3$ )  $\delta$  160.7, 144.6, 135.9, 135.0, 134.5, 130.8, 129.4, 129.0, 128.2, 128.2, 128.1, 125.8, 100.9, 52.0. Calcd for  $\text{C}_{16}\text{H}_{13}\text{N}_2\text{O}_3$   $[\text{M}+\text{H}]^+$ : 281.0926, found: 281.0929.

*N*-benzylphthalazin-1(2H)-one (**2u**)<sup>[3]</sup>

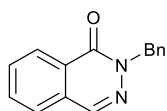

The reaction was performed according to procedure (a). White solid (49mg, 70%)  $^1\text{H}$  NMR (400 MHz,  $\text{CDCl}_3$ )  $\delta$  8.33 (d,  $J = 7.2$  Hz, 1H), 8.06 (s, 1H), 7.77 – 7.59 (m, 2H), 7.58 – 7.51 (m, 1H), 7.38 (d,  $J = 7.0$  Hz, 2H), 7.29 – 7.05 (m, 4H), 5.32 (s, 2H).  $^{13}\text{C}$  NMR (101 MHz,  $\text{CDCl}_3$ )  $\delta$  159.4, 138.0, 137.0, 133.1, 131.6, 129.7, 128.6, 128.5, 128.0, 127.7, 126.8, 126.0, 54.6.

5-benzylphenanthridin-6(5H)-one (**2v**)<sup>[4]</sup>

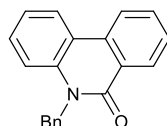

The reaction was performed according to procedure (a). White solid (65mg, 77%)  $^1\text{H}$  NMR (400 MHz,  $\text{CDCl}_3$ )  $\delta$  8.68 (d,  $J = 7.9$  Hz, 1H), 8.18 (t,  $J = 8.9$  Hz, 2H), 7.72 (t,  $J = 7.6$  Hz, 1H), 7.59 (t,  $J = 7.5$  Hz, 1H),

7.45 – 7.23 (m, 7H), 7.19 (t,  $J = 7.5$  Hz, 1H), 5.65 (s, 2H).  $^{13}\text{C}$  NMR (101 MHz,  $\text{CDCl}_3$ )  $\delta$  161.8, 137.2, 136.7, 133.8, 132.7, 129.5, 129.1, 128.8, 128.0, 127.2, 126.6, 125.4, 123.3, 122.5, 121.7, 119.4, 115.9, 46.4.

*N*-methylisoquinolin-1(2H)-one (**2w**)<sup>[2]</sup>

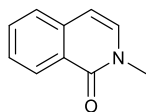

The reaction was performed according to procedure (a). Yellow oil (27.2mg, 57%)  $^1\text{H}$  NMR (400 MHz,  $\text{CDCl}_3$ )  $\delta$  8.42 (d,  $J = 8.1$  Hz, 1H), 7.63 – 7.53 (m, 1H), 7.51 – 7.41 (m, 2H), 7.02 (dd,  $J = 7.3, 1.2$  Hz, 1H), 6.44 (d,  $J = 7.3$  Hz, 1H), 3.56 (s, 3H).  $^{13}\text{C}$  NMR (101 MHz,  $\text{CDCl}_3$ )  $\delta$  162.5, 137.1, 132.4, 131.9, 127.5, 126.7, 126.0, 125.8, 105.8, 36.9

*N*-ethylisoquinolin-1(2H)-one (**2x**)<sup>[5]</sup>

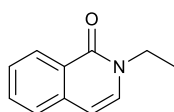

The reaction was performed according to procedure (a). Colorless oil (31.5 mg, 61%)  $^1\text{H}$  NMR (400 MHz,  $\text{CDCl}_3$ )  $\delta$  8.35 (d,  $J = 8.0$  Hz, 1H), 7.66 – 7.46 (m, 1H), 7.39 (dd,  $J = 14.2, 7.3$  Hz, 2H), 6.98 (d,  $J = 7.3$  Hz, 1H), 6.41 (d,  $J = 7.3$  Hz, 1H), 3.96 (q,  $J = 7.2$  Hz, 2H), 1.28 (t,  $J = 7.2$  Hz, 3H).  $^{13}\text{C}$  NMR (101 MHz,  $\text{CDCl}_3$ )  $\delta$  137.0, 131.9, 131.1, 127.7, 126.7, 126.3, 125.8, 106.2, 44.2, 14.6.

*N*-hexylisoquinolin-1(2H)-one (**2y**)

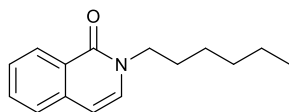

The reaction was performed according to procedure (a). White solid (45mg, 66%)  $^1\text{H}$  NMR (400 MHz,  $\text{CDCl}_3$ )  $\delta$  8.35 (d,  $J = 8.1$  Hz, 1H), 7.70 – 7.48 (m, 1H), 7.43 – 7.31 (m, 2H), 6.97 (d,  $J = 7.3$  Hz, 1H), 6.40 (d,  $J = 7.3$  Hz, 1H), 4.11 – 3.70 (m, 2H), 1.88 – 1.54 (m, 2H), 1.52 – 1.13 (m, 6H), 0.79 (dd,  $J = 9.4, 4.6$  Hz, 3H).  $^{13}\text{C}$  NMR (101 MHz,  $\text{CDCl}_3$ )  $\delta$  162.0, 137.0, 131.9, 131.7, 127.8, 126.7, 126.3, 125.8, 105.8, 49.4, 31.4, 29.2, 26.4, 22.5, 14.0. Calcd for  $\text{C}_{15}\text{H}_{20}\text{NO}$   $[\text{M}+\text{H}]^+$ : 230.1539, found: 230.1537.

*N*-(cyclopropylmethyl)isoquinolin-1(2H)-one (**2z**)<sup>[1]</sup>

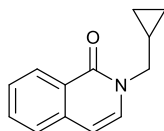

The reaction was performed according to procedure (a). White solid (38.4mg, 64%)  $^1\text{H}$  NMR (400 MHz,  $\text{CDCl}_3$ )  $\delta$  8.44 (d,  $J = 8.1$  Hz, 1H), 7.76 – 7.57 (m, 1H), 7.51 – 7.43 (m, 2H), 7.16 (d,  $J = 7.4$  Hz, 1H), 6.50 (d,  $J = 7.4$  Hz, 1H), 3.88 (d,  $J = 7.1$  Hz, 2H), 1.36 – 1.15 (m, 1H), 0.67 – 0.51 (m, 2H), 0.41 (q,  $J = 4.8$  Hz, 2H).  $^{13}\text{C}$  NMR (101 MHz,  $\text{CDCl}_3$ )  $\delta$  162.2, 137.0, 132.0, 131.4, 127.8, 126.6, 126.3, 125.8, 105.9, 53.1, 10.7, 3.8.

2-methylphthalazin-1(2H)-one (**2aa**)<sup>[4]</sup>

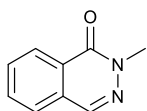

The reaction was performed according to procedure (a). yellow solid (29.5mg, 62%)  $^1\text{H}$  NMR (400 MHz,  $\text{CDCl}_3$ )  $\delta$  8.26 (d,  $J$  = 7.6 Hz, 1H), 7.99 (s, 1H), 7.74 – 7.57 (m, 2H), 7.54 (d,  $J$  = 7.2 Hz, 1H), 3.71 (s, 3H).  $^{13}\text{C}$  NMR (101 MHz,  $\text{CDCl}_3$ )  $\delta$  159.4, 137.4, 132.8, 131.4, 129.6, 127.5, 126.3, 125.8, 39.3.

5-methylphenanthridin-6(5H)-one (**2ab**)<sup>[2]</sup>

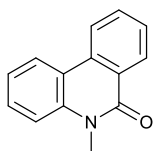

The reaction was performed according to procedure (a). White solid (47mg, 75%)  $^1\text{H}$  NMR (400 MHz,  $\text{CDCl}_3$ )  $\delta$  8.26 (d,  $J$  = 7.9 Hz, 1H), 7.79 (t,  $J$  = 6.9 Hz, 2H), 7.41 (t,  $J$  = 7.4 Hz, 1H), 7.29 (t,  $J$  = 7.5 Hz, 1H), 7.17 (dd,  $J$  = 9.5, 5.7 Hz, 1H), 7.03 – 6.85 (m, 2H), 3.44 (s, 3H).  $^{13}\text{C}$  NMR (101 MHz,  $\text{CDCl}_3$ )  $\delta$  161.2, 137.6, 133.2, 132.0, 129.2, 128.5, 127.6, 125.2, 122.8, 122.1, 121.40, 118.8, 114.7, 29.7.

4-bromo-2-methylisoquinolin-1(2H)-one (**2ac**)<sup>[1]</sup>

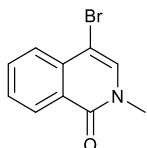

The reaction was performed according to procedure (a). White solid (46 mg, 65%)  $^1\text{H}$  NMR (400 MHz,  $\text{CDCl}_3$ )  $\delta$  8.49 – 8.37 (m, 1H), 7.94 – 7.65 (m, 2H), 7.61 – 7.48 (m, 1H), 7.36 (s, 1H), 3.60 (s, 3H).  $^{13}\text{C}$  NMR (101 MHz,  $\text{CDCl}_3$ )  $\delta$  161.6, 135.4, 132.9, 132.8, 128.0, 127.8, 126.2, 125.7, 99.5, 36.9.

5-bromo-2-methylisoquinolin-1(2H)-one (**2ad**)<sup>[1]</sup>

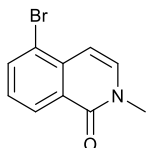

The reaction was performed according to procedure (a). White solid (48mg, 68%)  $^1\text{H}$  NMR (400 MHz,  $\text{CDCl}_3$ )  $\delta$  8.27 (d,  $J$  = 8.1 Hz, 1H), 7.73 (dd,  $J$  = 7.7, 1.2 Hz, 1H), 7.19 (t,  $J$  = 7.8 Hz, 1H), 7.03 (d,  $J$  = 7.6 Hz, 1H), 6.65 (d,  $J$  = 7.6 Hz, 1H), 3.49 (s, 3H).  $^{13}\text{C}$  NMR (101 MHz,  $\text{CDCl}_3$ )  $\delta$  161.7, 136.3, 135.7, 133.5, 127.4, 127.2, 120.4, 104.4, 37.1.

6-bromo-2-methylisoquinolin-1(2H)-one (**2ae**)<sup>[1]</sup>

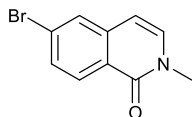

The reaction was performed according to procedure (a). White solid (47mg, 66%)  $^1\text{H}$  NMR (400 MHz,  $\text{CDCl}_3$ )  $\delta$  8.12 (d,  $J$  = 8.6 Hz, 1H), 7.49 (d,  $J$  = 1.8 Hz, 1H), 7.41 (dd,  $J$  = 8.6, 1.9 Hz, 1H), 6.96 (d,  $J$  = 7.3 Hz, 1H), 6.22 (d,  $J$  = 7.3 Hz, 1H), 3.46 (s, 3H).  $^{13}\text{C}$  NMR (101 MHz,  $\text{CDCl}_3$ )  $\delta$  161.9, 138.4, 133.7, 129.8, 129.4, 128.1, 127.0, 124.6, 104.6, 37.0.

2,3-dimethylisoquinolin-1(2H)-one (**2af**)<sup>[6]</sup>

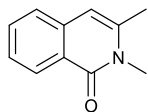

The reaction was performed according to procedure (a). White solid (31mg, 60%) <sup>1</sup>H NMR (400 MHz, CDCl<sub>3</sub>) δ 7.54 (s, 1H), 7.50 (t, *J* = 7.3 Hz, 2H), 7.33 (d, *J* = 8.5 Hz, 1H), 7.21 (t, *J* = 7.5 Hz, 1H), 3.74 (s, 3H), 2.26 (s, 3H). <sup>13</sup>C NMR (101 MHz, CDCl<sub>3</sub>) δ 162.9, 139.0, 135.6, 130.0, 129.2, 127.8, 121.9, 120.7, 113.9, 29.7, 17.7.

2,2'-(hexane-1,6-diyl)bis(isoquinolin-1(2H)-one) (**2ag**)<sup>[2]</sup>

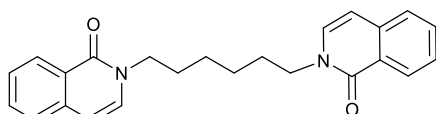

The reaction was performed according to procedure (a). White solid (36mg, 65%) <sup>1</sup>H NMR (600 MHz, CDCl<sub>3</sub>) δ 8.42 (dd, *J* = 8.0, 1.3 Hz, 2H), 7.65 – 7.55 (m, 2H), 7.53 – 7.38 (m, 4H), 7.01 (d, *J* = 7.3 Hz, 2H), 6.45 (d, *J* = 7.3 Hz, 2H), 3.96 (t, *J* = 7.4 Hz, 4H), 1.76 (t, *J* = 7.3 Hz, 4H), 1.47 – 1.35 (m, 4H). <sup>13</sup>C NMR (151 MHz, CDCl<sub>3</sub>) δ 162.0, 137.0, 132.0, 131.6, 127.7, 126.7, 126.2, 125.8, 105.9, 49.1, 29.1, 26.3. Calcd for C<sub>24</sub>H<sub>25</sub>N<sub>2</sub>O<sub>2</sub> [M+H]<sup>+</sup>: 373.1911, found: 373.1915.

*N*-benzylquinolin-2(1H)-one (**4a**)<sup>[4]</sup>

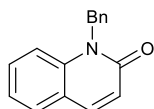

The reaction was performed according to procedure (a). White solid (37 mg, 52 %) <sup>1</sup>H NMR (400 MHz, CDCl<sub>3</sub>) δ 7.65 (d, *J* = 9.5 Hz, 1H), 7.47 (dd, *J* = 7.7, 1.4 Hz, 1H), 7.32 (ddd, *J* = 8.7, 7.3, 1.5 Hz, 1H), 7.26 – 7.02 (m, 7H), 6.72 (d, *J* = 9.5 Hz, 1H), 5.47 (s, 2H). <sup>13</sup>C NMR (101 MHz, CDCl<sub>3</sub>) δ 162.5, 139.6, 139.4, 136.3, 130.6, 128.8, 128.8, 127.2, 126.6, 122.2, 121.6, 120.9, 115.0, 45.9.

*N*-(4-methylbenzyl)quinolin-2(1H)-one (**4b**)<sup>[4]</sup>

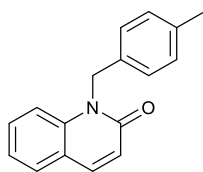

The reaction was performed according to procedure (a). White solid (42 mg, 56 %) <sup>1</sup>H NMR (400 MHz, CDCl<sub>3</sub>) δ 7.71 (d, *J* = 9.5 Hz, 1H), 7.54 (dd, *J* = 7.7, 1.3 Hz, 1H), 7.40 (ddd, *J* = 8.6, 7.3, 1.5 Hz, 1H), 7.30 – 7.24 (m, 1H), 7.20 – 7.03 (m, 5H), 6.79 (d, *J* = 9.5 Hz, 1H), 5.51 (s, 2H), 2.28 (s, 3H). <sup>13</sup>C NMR (101 MHz, CDCl<sub>3</sub>) δ 162.5, 139.5, 136.9, 133.3, 130.6, 129.4, 128.8, 126.6, 122.1, 121.7, 120.9, 115.0, 45.7, 21.0.

*N*-(4-bromobenzyl)quinolin-2(1H)-one (**4c**)<sup>[7]</sup>

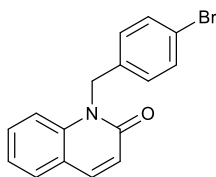

The reaction was performed according to procedure (a). White solid (47 mg, 50 %)  $^1\text{H}$  NMR (400 MHz,  $\text{CDCl}_3$ )  $\delta$  7.74 (d,  $J = 9.5$  Hz, 1H), 7.57 (dd,  $J = 7.9, 1.2$  Hz, 1H), 7.49 – 7.33 (m, 3H), 7.20 (dd,  $J = 7.9, 4.5$  Hz, 2H), 7.10 (d,  $J = 8.4$  Hz, 2H), 6.79 (d,  $J = 9.5$  Hz, 1H), 5.49 (s, 2H).  $^{13}\text{C}$  NMR (101 MHz,  $\text{CDCl}_3$ )  $\delta$  162.4, 139.7, 139.2, 135.4, 131.9, 130.7, 129.0, 128.4, 122.4, 121.6, 121.17, 120.9, 114.7, 45.3.

*N*-(4-fluorobenzyl)quinolin-2(1H)-one (**4d**)<sup>[7]</sup>

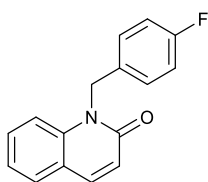

The reaction was performed according to procedure (a). White solid (42mg, 55 %)  $^1\text{H}$  NMR (400 MHz,  $\text{CDCl}_3$ )  $\delta$  7.72 (dd,  $J = 9.5, 2.1$  Hz, 1H), 7.54 (dd,  $J = 7.7, 1.9$  Hz, 1H), 7.42 (ddd,  $J = 8.8, 7.3, 1.7$  Hz, 1H), 7.27 – 7.11 (m, 4H), 6.96 (td,  $J = 8.6, 1.9$  Hz, 2H), 6.85 – 6.71 (m, 1H), 5.50 (s, 2H).  $^{13}\text{C}$  NMR (101 MHz,  $\text{CDCl}_3$ )  $\delta$  163.2, 162.4, 160.7, 139.7, 139.3, 132.1, 132.0, 130.7, 128.9, 128.4, 128.3, 122.3, 121.5, 120.9, 115.8, 115.5, 114.8, 45.2.

*N*-(4-(trifluoromethyl)benzyl)quinolin-2(1H)-one (**4e**)<sup>[7]</sup>

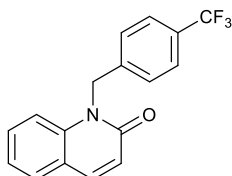

The reaction was performed according to procedure (a). White solid (61 mg, 58 %)  $^1\text{H}$  NMR (400 MHz,  $\text{CDCl}_3$ )  $\delta$  7.77 (d,  $J = 9.5$  Hz, 1H), 7.71 – 7.50 (m, 3H), 7.49 – 7.38 (m, 1H), 7.33 (d,  $J = 8.0$  Hz, 2H), 7.25 – 7.09 (m, 2H), 6.81 (d,  $J = 9.5$  Hz, 1H), 5.61 (s, 2H).  $^{13}\text{C}$  NMR (101 MHz,  $\text{CDCl}_3$ )  $\delta$  162.4, 140.5, 139.8, 139.2, 130.8, 129.1, 126.9, 125.8, 125.8, 125.8, 125.7, 122.5, 121.5, 120.9, 114.6, 45.5.

*N*-(2-bromobenzyl)quinolin-2(1H)-one (**4f**)<sup>[4]</sup>

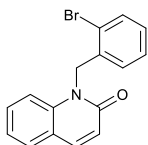

The reaction was performed according to procedure (a). White solid (42 mg, 45 %)  $^1\text{H}$  NMR (400 MHz,  $\text{CDCl}_3$ )  $\delta$  7.78 (d,  $J = 9.5$  Hz, 1H), 7.60 (ddd,  $J = 9.5, 6.3, 1.9$  Hz, 2H), 7.42 (ddd,  $J = 8.7, 7.3, 1.5$  Hz, 1H), 7.24 – 7.16 (m, 1H), 7.12 – 7.06 (m, 2H), 7.02 (d,  $J = 8.5$  Hz, 1H), 6.81 (d,  $J = 9.5$  Hz, 1H), 6.75 – 6.62 (m, 2H).  $^{13}\text{C}$  NMR (101 MHz,  $\text{CDCl}_3$ )  $\delta$  162.4, 139.8, 139.2, 134.75, 132.9, 130.9, 128.9, 128.8, 127.8, 126.9, 122.5, 122.5, 121.5, 120.9, 114.9, 46.4.

***N*-(3-chlorobenzyl)quinolin-2(1H)-one (4g)**

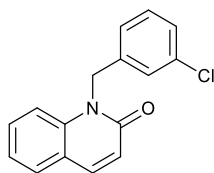

The reaction was performed according to procedure (a). The reaction was performed according to procedure (a). White solid (41 mg, 51 %)  $^1\text{H}$  NMR (400 MHz,  $\text{CDCl}_3$ )  $\delta$  7.73 (d,  $J = 9.5$  Hz, 1H), 7.63 – 7.52 (m, 1H), 7.42 (t,  $J = 7.9$  Hz, 1H), 7.22 – 7.16 (m, 5H), 7.12 – 7.04 (m, 1H), 6.79 (d,  $J = 9.5$  Hz, 1H), 5.43 (d,  $J = 60.2$  Hz, 2H).  $^{13}\text{C}$  NMR (101 MHz,  $\text{CDCl}_3$ )  $\delta$  162.4, 139.8, 139.2, 138.5, 134.7, 130.8, 130.1, 129.0, 127.6, 126.7, 124.8, 122.4, 121.5, 120.9, 114.7, 45.4. Calcd for  $\text{C}_{16}\text{H}_{13}\text{ClNO}$   $[\text{M}+\text{H}]^+$ : 270.0680, found: 270.1682.

**1-methylquinolin-2(1H)-one (4h)** <sup>[2]</sup>

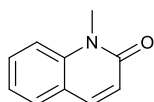

The reaction was performed according to procedure (a). Yellow solid (27 mg, 58 %)  $^1\text{H}$  NMR (400 MHz,  $\text{CDCl}_3$ )  $\delta$  7.67 (d,  $J = 9.5$  Hz, 1H), 7.58 (dd,  $J = 12.7, 4.4$  Hz, 2H), 7.37 (d,  $J = 8.4$  Hz, 1H), 7.26 – 7.18 (m, 1H), 6.71 (d,  $J = 9.5$  Hz, 1H), 3.72 (s, 3H).  $^{13}\text{C}$  NMR (101 MHz,  $\text{CDCl}_3$ )  $\delta$  162.3, 140.0, 138.9, 130.6, 128.7, 122.1, 121.7, 120.6, 114.1, 29.4.

**1-benzyl-3-methylquinolin-2(1H)-one (4i)** <sup>[6]</sup>

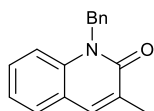

The reaction was performed according to procedure (a). White solid (40 mg, 54 %)  $^1\text{H}$  NMR (400 MHz,  $\text{CDCl}_3$ )  $\delta$  7.62 (s, 1H), 7.50 (dd,  $J = 7.7, 1.4$  Hz, 1H), 7.36 (ddd,  $J = 8.6, 7.3, 1.5$  Hz, 1H), 7.32 – 7.19 (m, 7H), 7.19 – 7.12 (m, 1H), 5.58 (s, 2H), 2.32 (d,  $J = 1.1$  Hz, 3H).  $^{13}\text{C}$  NMR (101 MHz,  $\text{CDCl}_3$ )  $\delta$  163.0, 138.6, 136.6, 136.3, 130.0, 129.3, 128.7, 127.9, 127.2, 126.6, 122.1, 121.1, 114.7, 46.2, 17.8.

**5-bromo-1-methylquinolin-2(1H)-one (4j)** <sup>[2]</sup>

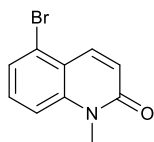

The reaction was performed according to procedure (a). White solid (37 mg, 53 %)  $^1\text{H}$  NMR (600 MHz,  $\text{CDCl}_3$ )  $\delta$  8.06 (d,  $J = 9.8$  Hz, 1H), 7.45 (dd,  $J = 7.6, 1.1$  Hz, 1H), 7.42 – 7.37 (m, 1H), 7.30 (d,  $J = 8.2$  Hz, 1H), 6.74 (dd,  $J = 9.8, 1.0$  Hz, 1H), 3.69 (s, 3H).  $^{13}\text{C}$  NMR (151 MHz,  $\text{CDCl}_3$ )  $\delta$  161.7, 141.1, 137.4, 130.9, 126.3, 123.7, 122.7, 119.6, 113.8, 29.8.

**6-bromo-1-methylquinolin-2(1H)-one (4k)** <sup>[2]</sup>

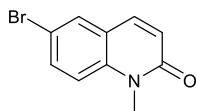

The reaction was performed according to procedure (a). White solid (35 mg, 50 %)  $^1\text{H}$  NMR (400 MHz,  $\text{CDCl}_3$ )  $\delta$  7.62 (d,  $J = 9.5$  Hz, 1H), 7.52 (d,  $J = 1.0$  Hz, 1H), 7.41 (d,  $J = 8.3$  Hz, 1H), 7.34 (dd,  $J = 8.3, 1.6$  Hz, 1H), 6.71 (d,  $J = 9.5$  Hz, 1H), 3.68 (s, 3H).  $^{13}\text{C}$  NMR (101 MHz,  $\text{CDCl}_3$ )  $\delta$  161.9, 140.9, 138.4, 129.8, 125.3, 125.1, 122.1, 119.4, 117.2, 29.5.

#### 7-bromo-1-methylquinolin-2(1H)-one (4I)

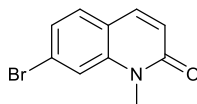

The reaction was performed according to procedure (a). White solid (32 mg, 46 %)  $^1\text{H}$  NMR (400 MHz,  $\text{CDCl}_3$ )  $\delta$  7.69 (d,  $J = 2.1$  Hz, 1H), 7.64 (dd,  $J = 9.0, 2.2$  Hz, 1H), 7.59 (d,  $J = 9.5$  Hz, 1H), 7.24 (d,  $J = 9.0$  Hz, 1H), 6.74 (d,  $J = 9.5$  Hz, 1H), 3.70 (s, 3H).  $^{13}\text{C}$  NMR (101 MHz,  $\text{CDCl}_3$ )  $\delta$  161.9, 139.0, 137.7, 133.3, 130.8, 123.0, 122.1, 115.8, 114.9, 29.5. Calcd for  $\text{C}_{10}\text{H}_9\text{BrNO}$   $[\text{M}+\text{H}]^+$ : 237.9862, found: 237.9860.

#### topoisomerase I inhibitor 5<sup>[2, 4]</sup>

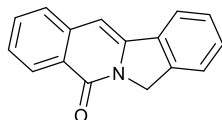

The reaction was performed according to procedure (c). White solid (88 mg, 76 % yield)  $^1\text{H}$  NMR (400 MHz,  $\text{CDCl}_3$ )  $\delta$  8.45 (d,  $J = 8.1$  Hz, 1H), 7.73 (dt,  $J = 7.6, 3.9$  Hz, 1H), 7.61 – 7.54 (m, 2H), 7.51 (dt,  $J = 6.3, 3.4$  Hz, 1H), 7.46 – 7.39 (m, 3H), 6.95 (s, 1H), 5.12 (s, 2H).  $^{13}\text{C}$  NMR (101 MHz,  $\text{CDCl}_3$ )  $\delta$  161.0, 142.1, 137.9, 137.6, 134.0, 132.1, 129.7, 128.3, 127.3, 126.3, 126.13, 124.7, 123.4, 120.9, 97.9, 52.0.

## 5. Isotope labeling experiment and control experiment

a) procedure for the oxidation of N-alkyl iminium salts in  $\text{H}_2^{18}\text{O}$  with  $\text{O}_2$  as oxidant.

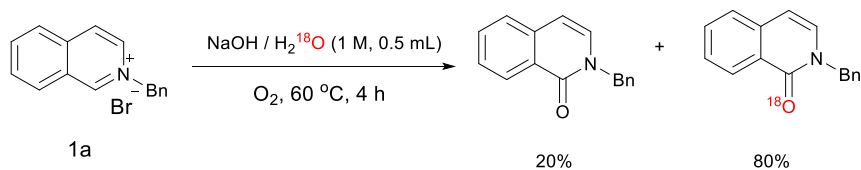

A 10 mL oven-dried screw-capped test tube with stir bar was charged with  $\text{O}_2$ , isoquinolinium salts **1a** (0.1 mmol, 1.0 equiv.) and solution of sodium hydroxide (1 M in  $\text{H}_2^{18}\text{O}$ ) 0.5 mL, and the mixture was stirred at 60 °C for 4h. Stop the reaction and cool to room temperature, the mixture was extract with ethyl acetate (2×5 mL), organic phase was concentrated under vacuum after combine and dry with  $\text{Na}_2\text{SO}_4$ . And  $^{18}\text{O}$  labeling product was detected by GC-MS with high deuterium substitution rate (up to 80 %).

b) procedure for the oxidation of N-alkyl iminium salts in  $\text{H}_2\text{O}$  with  $^{18}\text{O}_2$  as oxidant.

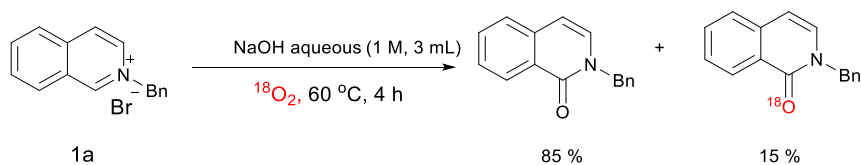

A 10 mL oven-dried screw-capped test tube with stir bar was charged with  $^{18}\text{O}_2$ , isoquinolinium salts **1a** (0.3 mmol, 1.0 equiv.) and solution of sodium hydroxide (1 M in  $\text{H}_2\text{O}$ ) 3 mL, and the mixture was stirred at 60 °C for 4h. Stop the reaction and cool to room temperature, the mixture was extract with ethyl acetate (2×5 mL), organic phase was concentrated under vacuum after combine and dry with  $\text{Na}_2\text{SO}_4$ . And  $^{18}\text{O}$  labeling product was detected by GC-MS with only 13 % deuterium substitution rate.

c) procedure for the  $^{18}\text{O}$  exchange of **2a** with  $\text{H}_2^{18}\text{O}$  in standard condition.

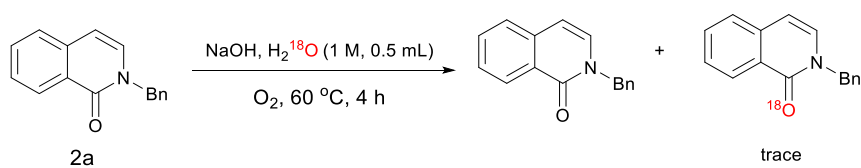

A 10 mL oven-dried screw-capped test tube with stir bar was charged with  $\text{O}_2$ , **2a** (0.1 mmol, 1.0 equiv.) and solution of sodium hydroxide (1 M in  $\text{H}_2^{18}\text{O}$ ) 0.5 mL, and the mixture was stirred at 60 °C for 4h. Stop the reaction and cool to room temperature, the mixture was extract with ethyl acetate (2×5 mL), organic phase was dry with  $\text{Na}_2\text{SO}_4$ . And  $^{18}\text{O}$  labeling product was detected by GC-MS with only trace deuterium substitution rate.



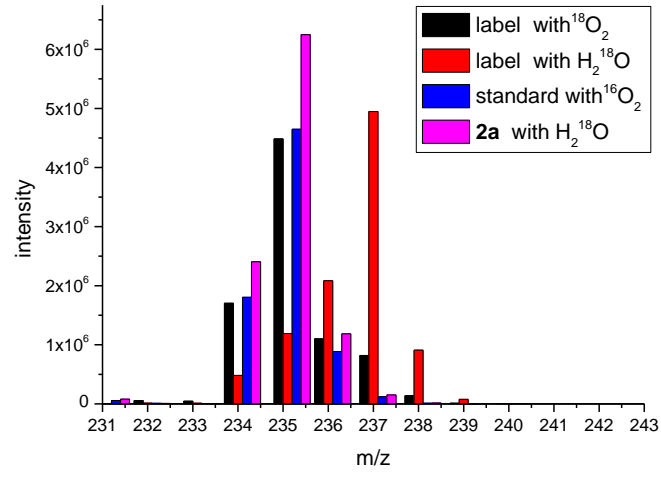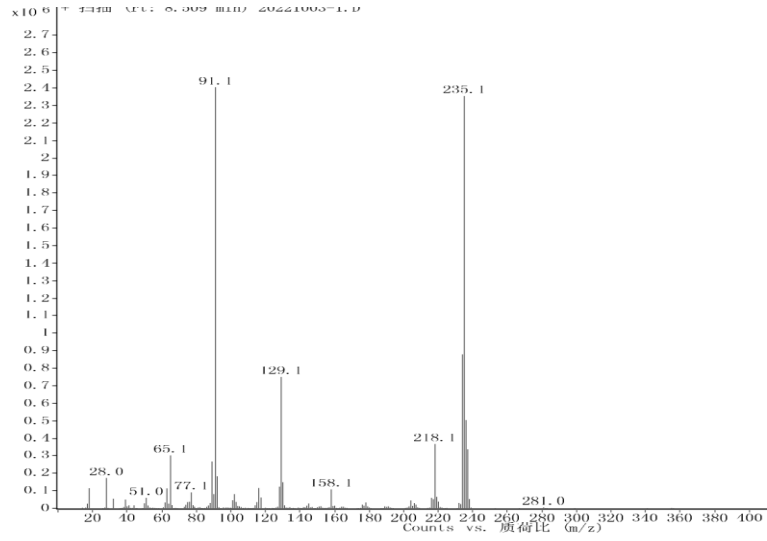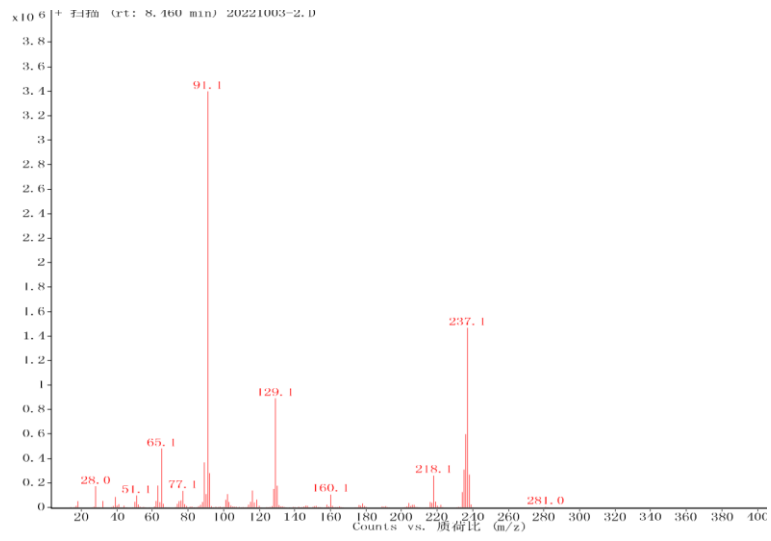

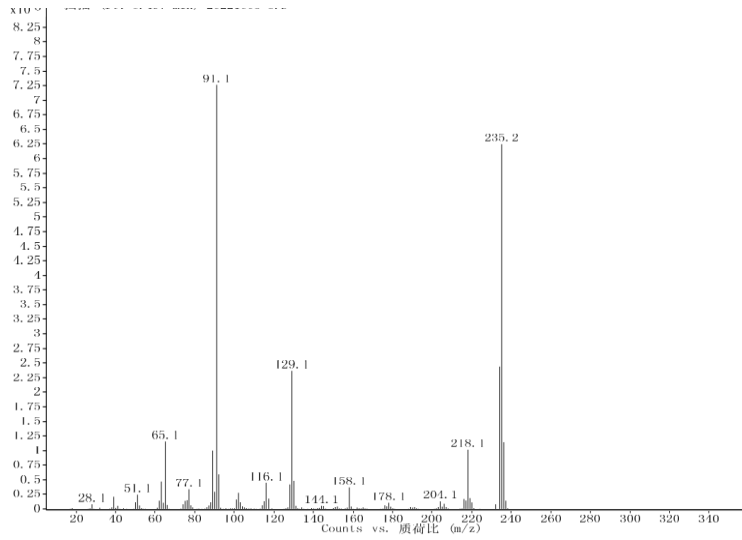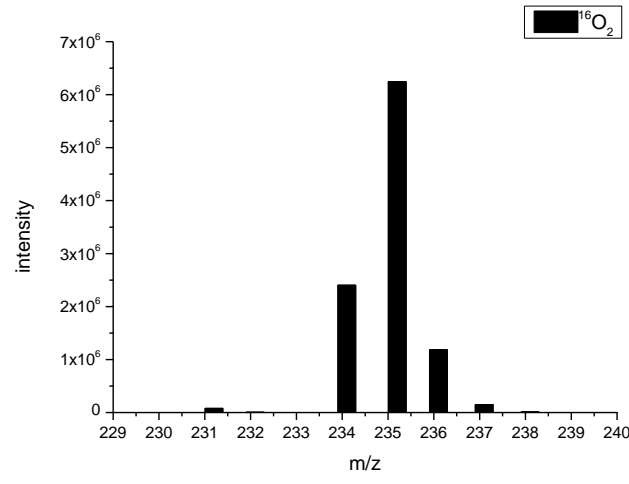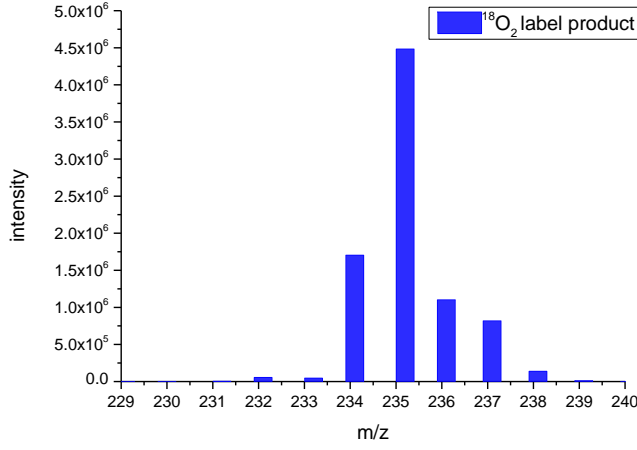

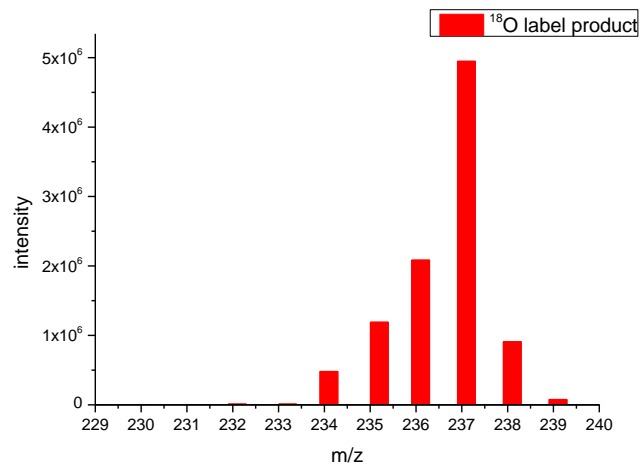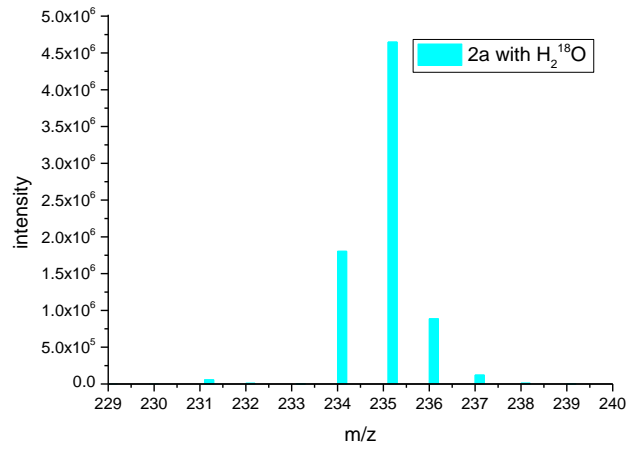

## 6. References

- [1] Wang, G. J. ; Hu, W. Y. ; Hu, Z. I.; Zhang, Y. X.; Yao, W.; Li, L.; Fu, Z. Q.; Huang, W. *Green Chem.*, 2018, 20, 3302–3307.
- [2] Y. Jin, L. Ou, H. Yang and H. Fu, *J. Am. Chem. Soc.*, 2017, **139**, 14237-14243.
- [3] W. K. Luo, X. Shi, W. Zhou and L. Yang, *Org. Lett.*, 2016, **18**, 2036-2039.
- [4] L. G. Bai, Y. Zhou, X. Zhuang, L. Zhang, J. Xue, X. L. Lin, T. Cai and Q. L. Luo, *Green Chem.*, 2020, **22**, 197-203.
- [5] A. C. Shaikh, D. R. Shinde and N. T. Patil, *Org. Lett.* 2016, **18**, 1056-1059.
- [6] K. Yasui, M. Kamitani and M. Tobisu, *Angew. Chem. Int. Ed.*, 2019, **58**, 14157-14161.
- [7] X. Hu, A. Ding, D. Xu and H. Guo, *Chem. Commun.*, 2021, **57**, 7441-7444.
- [8] M. Zhou, K. Yu, J. Liu, W. Shi, Y. Pan, H. Tang, X. Peng, Q. Liu and H. Wang, *RSC Advances*, 2021, **11**, 16246-16251.
- [9] G. Yang and W. Zhang, *Org. Lett.*, 2012, **14**, 268-271.
- [10] T.-H. Wang, W.-C. Lee and T.-G. Ong, *Adv. Synth. Catal.*, 2016, **358**, 2751-2758
- [11] A. D. Takwale, Y. U. Jeon, D. H. Lee, H. J. Kim and J. Y. Hwang, *Tetrahedron Lett.*, 2019, **60**, 1259-1261

## 7.Copies of NMR for 2a-2k and 3a-3g

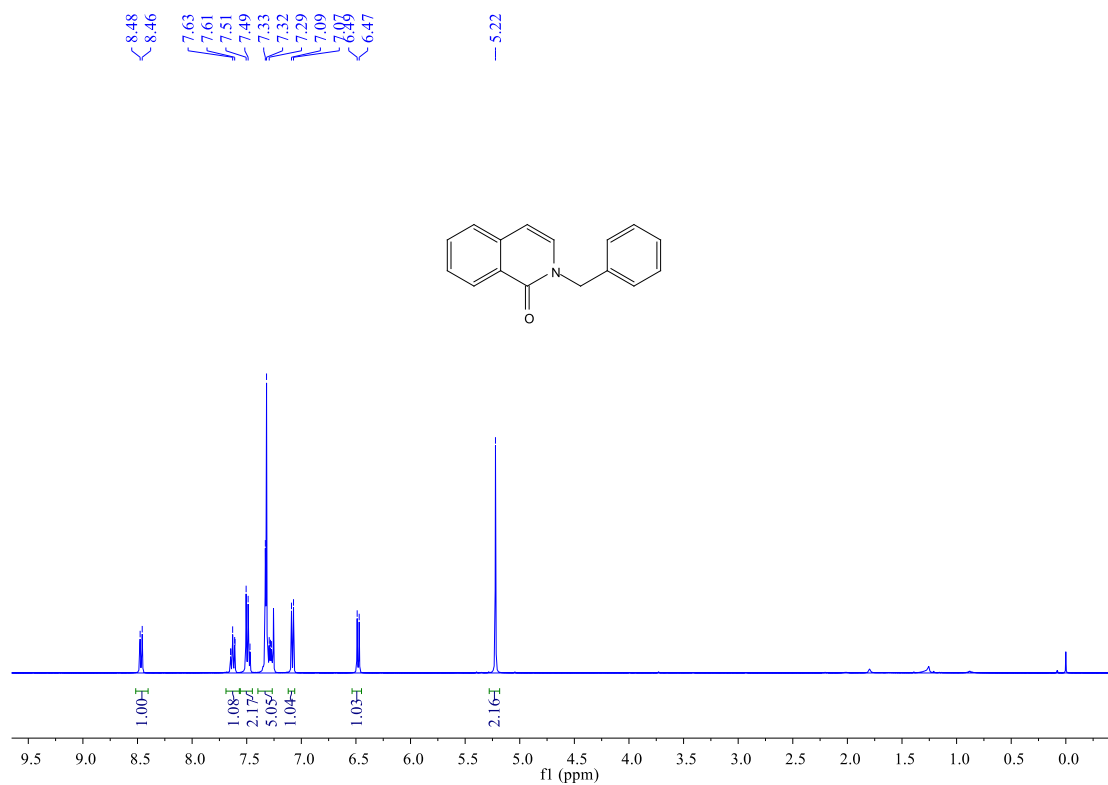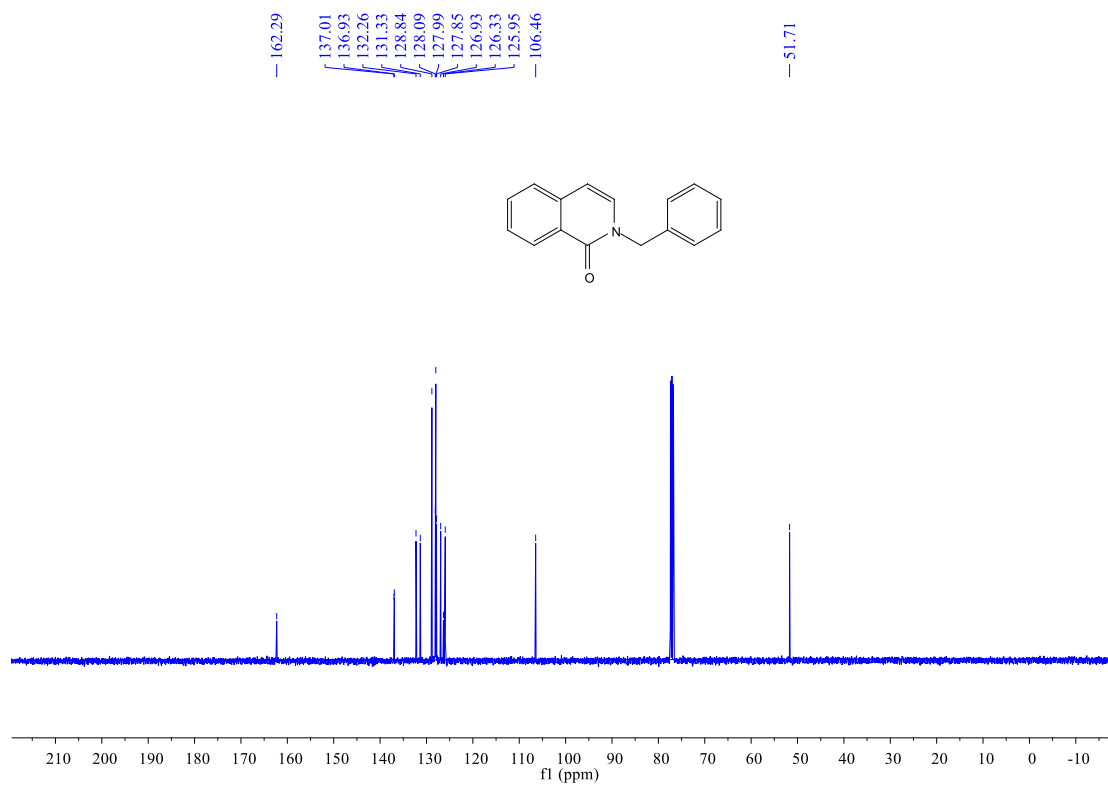

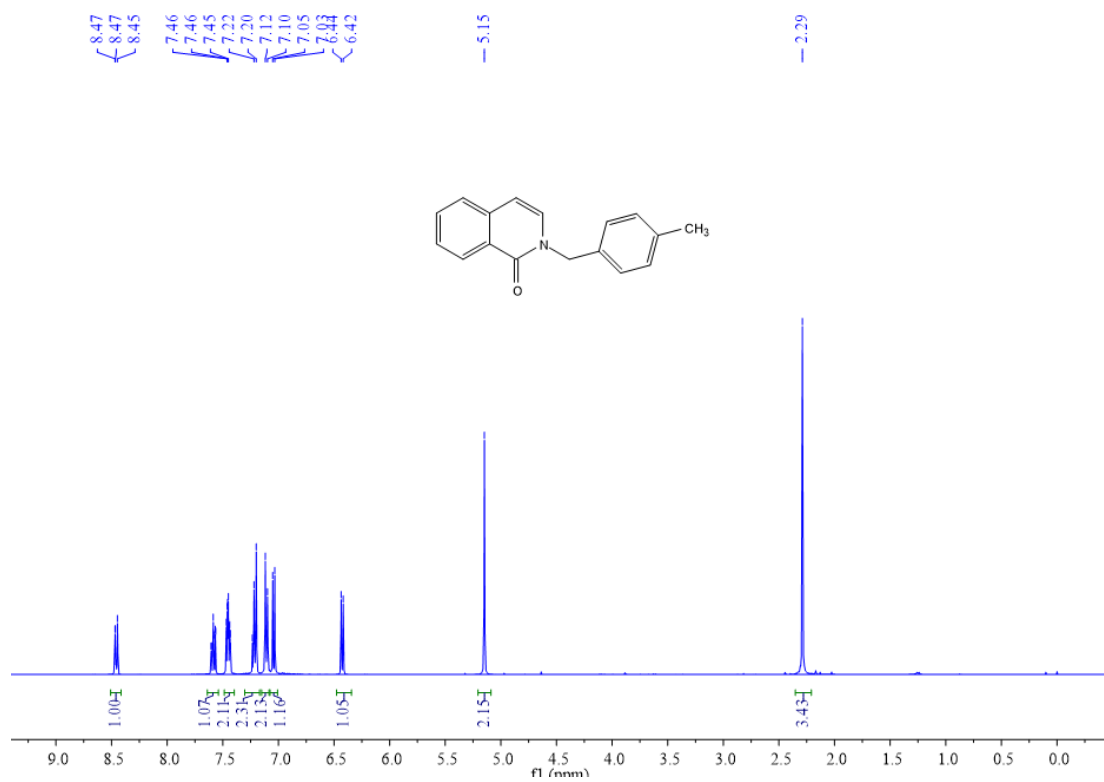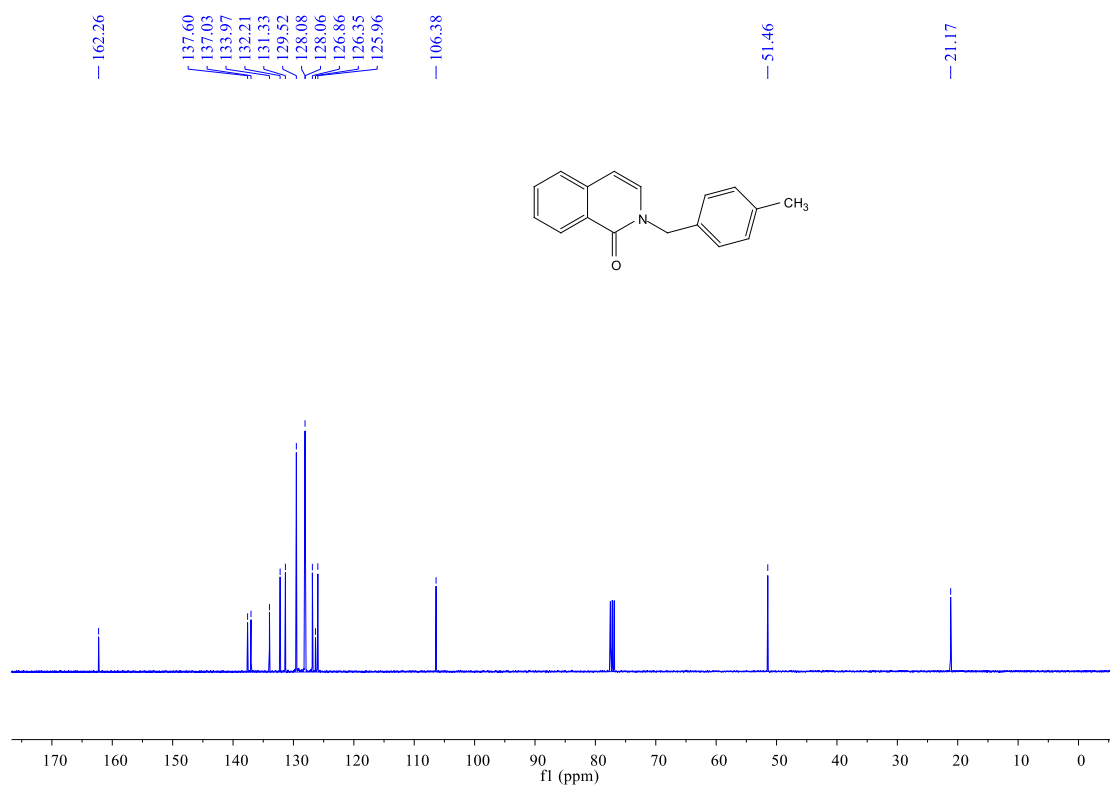

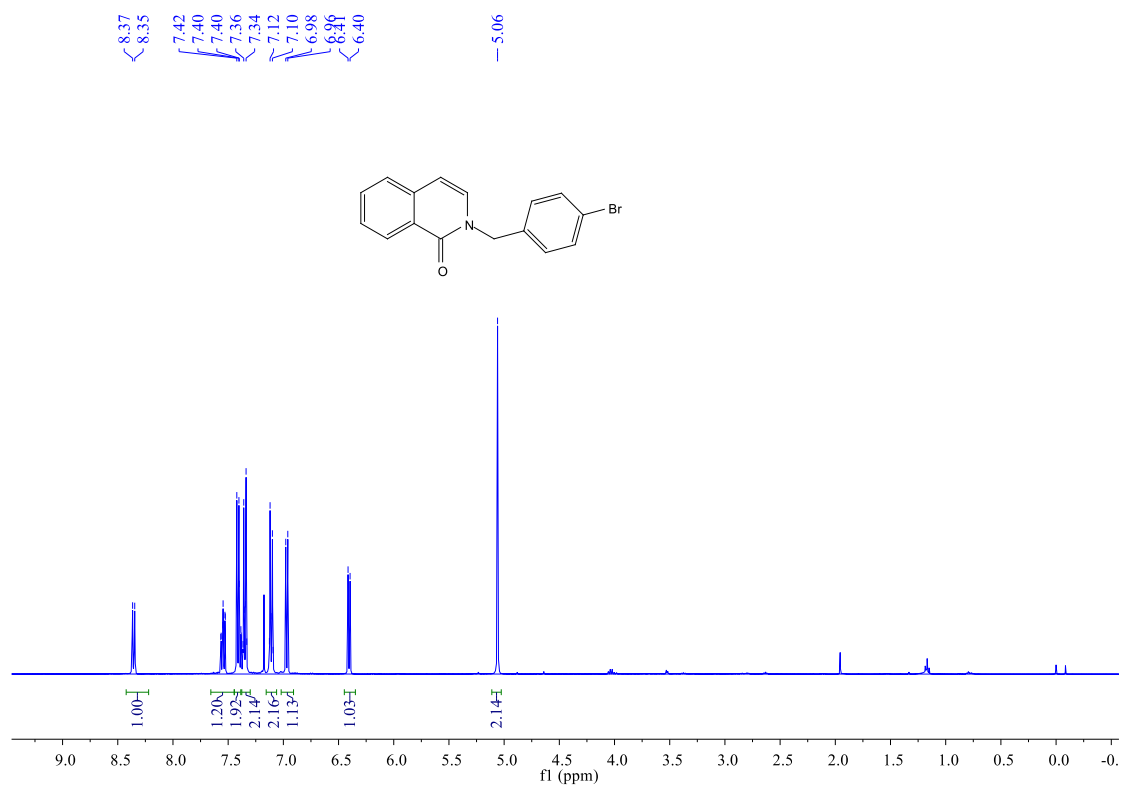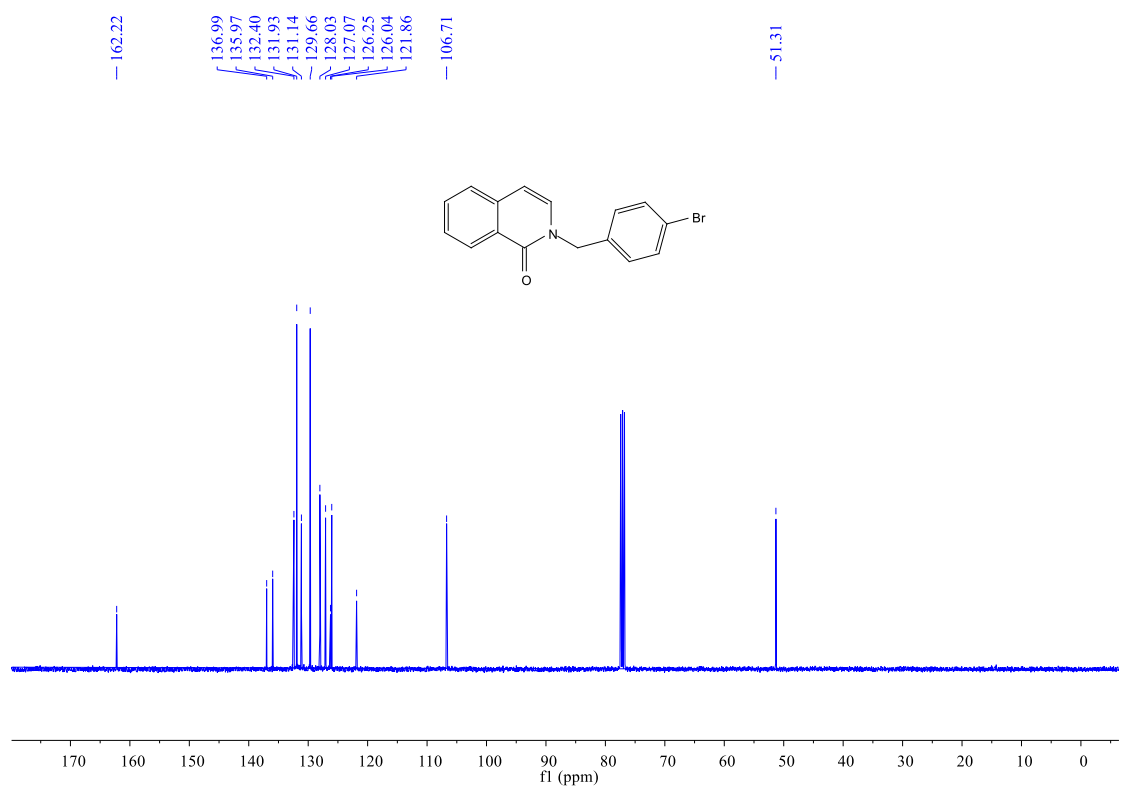

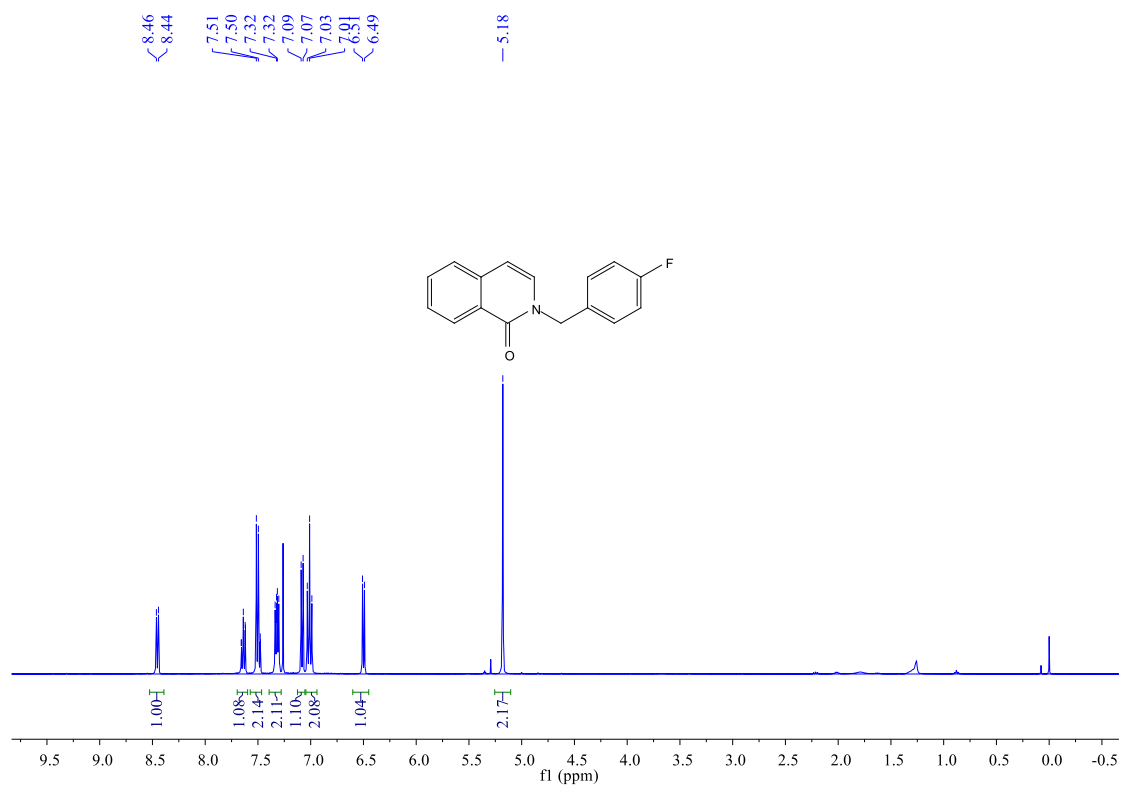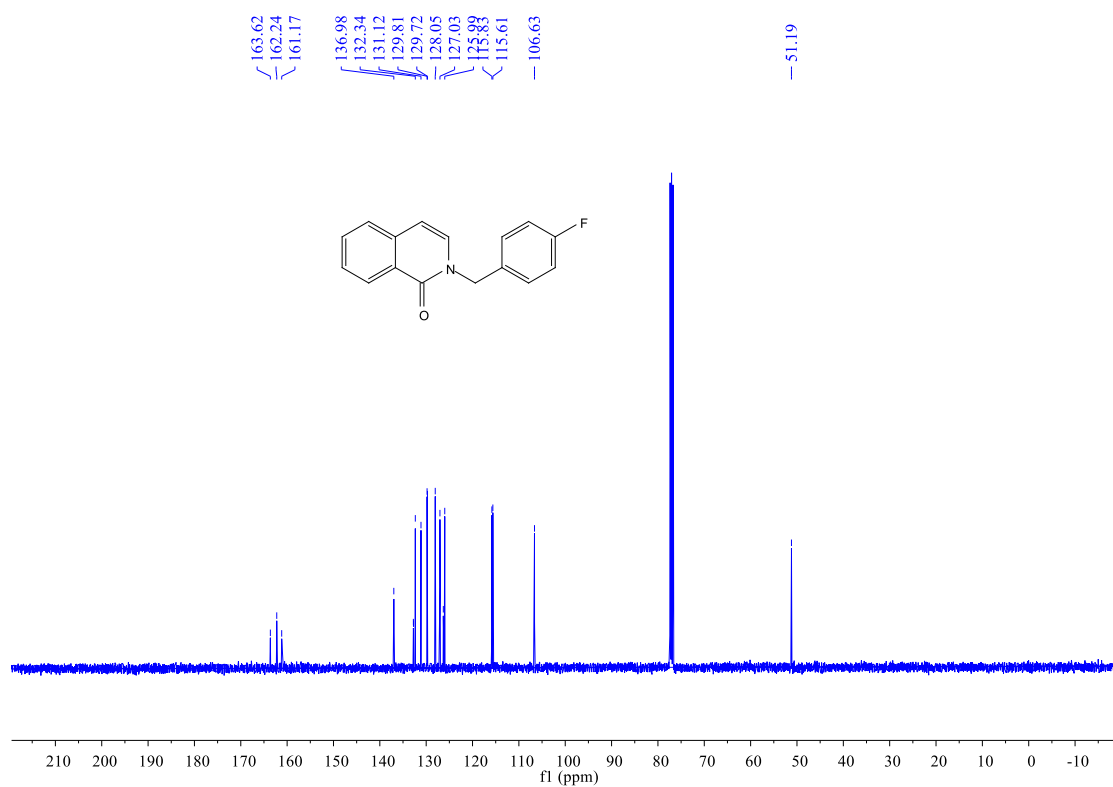



7.46  
7.41  
7.68  
7.66  
7.61  
7.61  
7.60  
7.58  
7.58  
7.52  
7.49  
7.47  
7.42  
7.08

6.51  
6.53

5.27

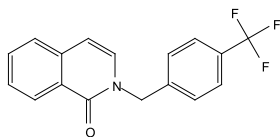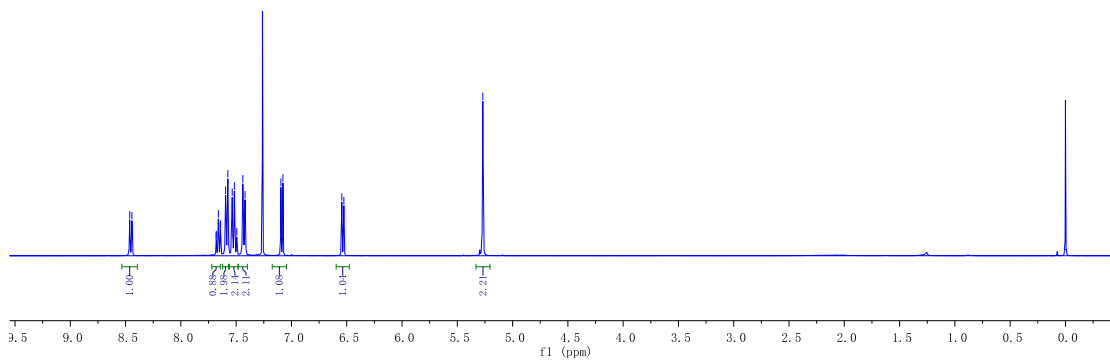

162.26

140.90

137.01

132.05

128.08

128.05

128.08

126.21

126.06

125.78

106.88

51.57

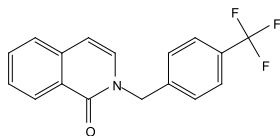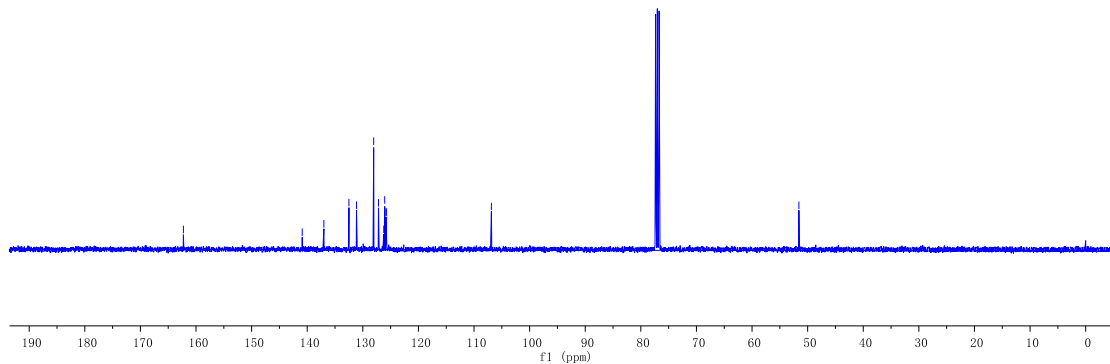

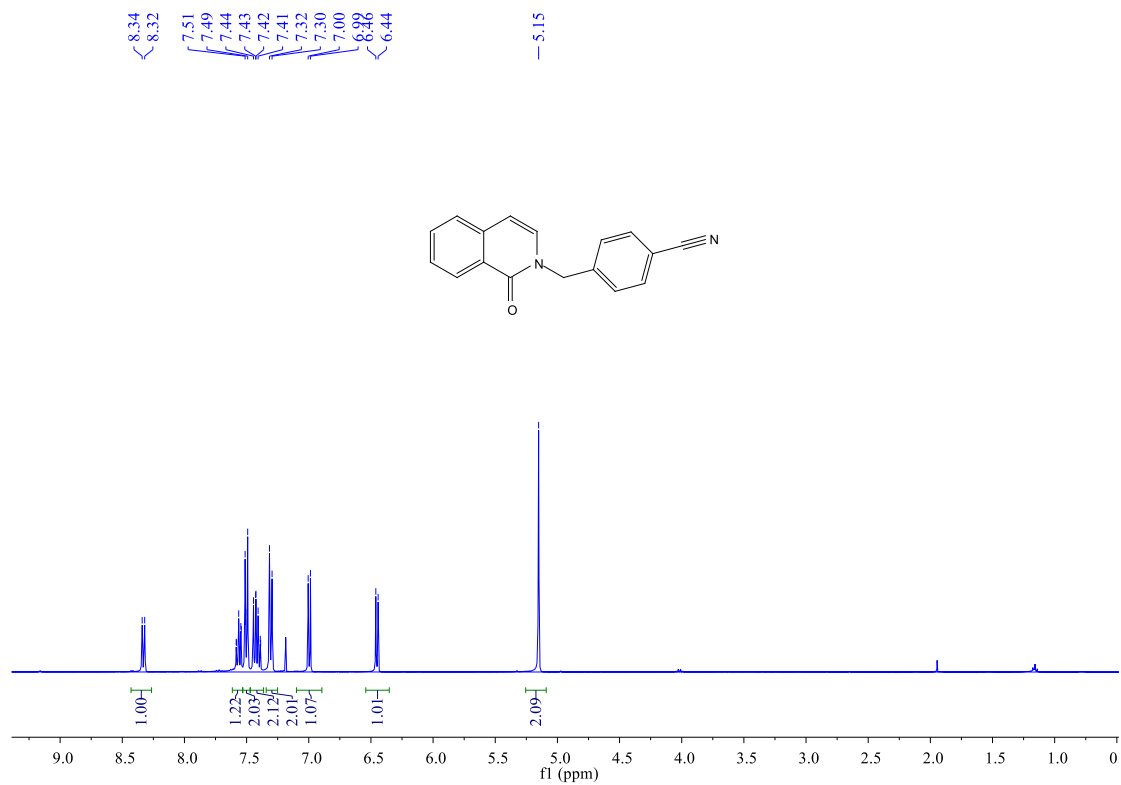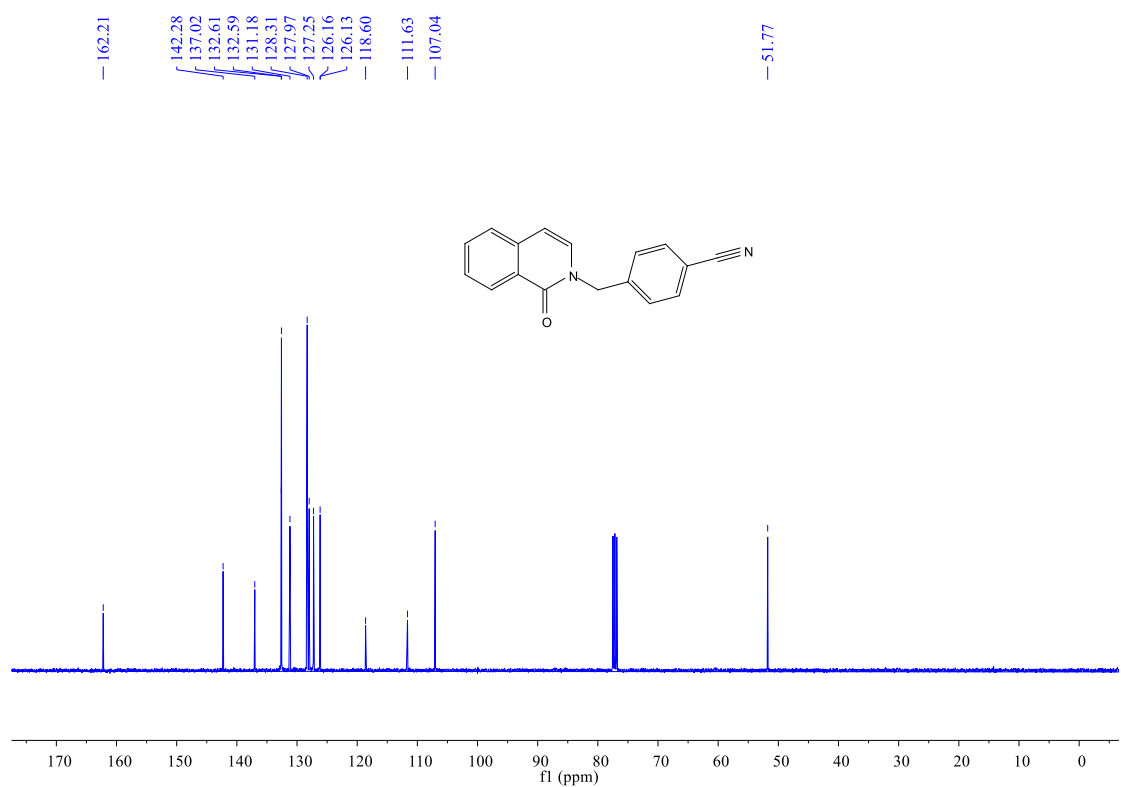

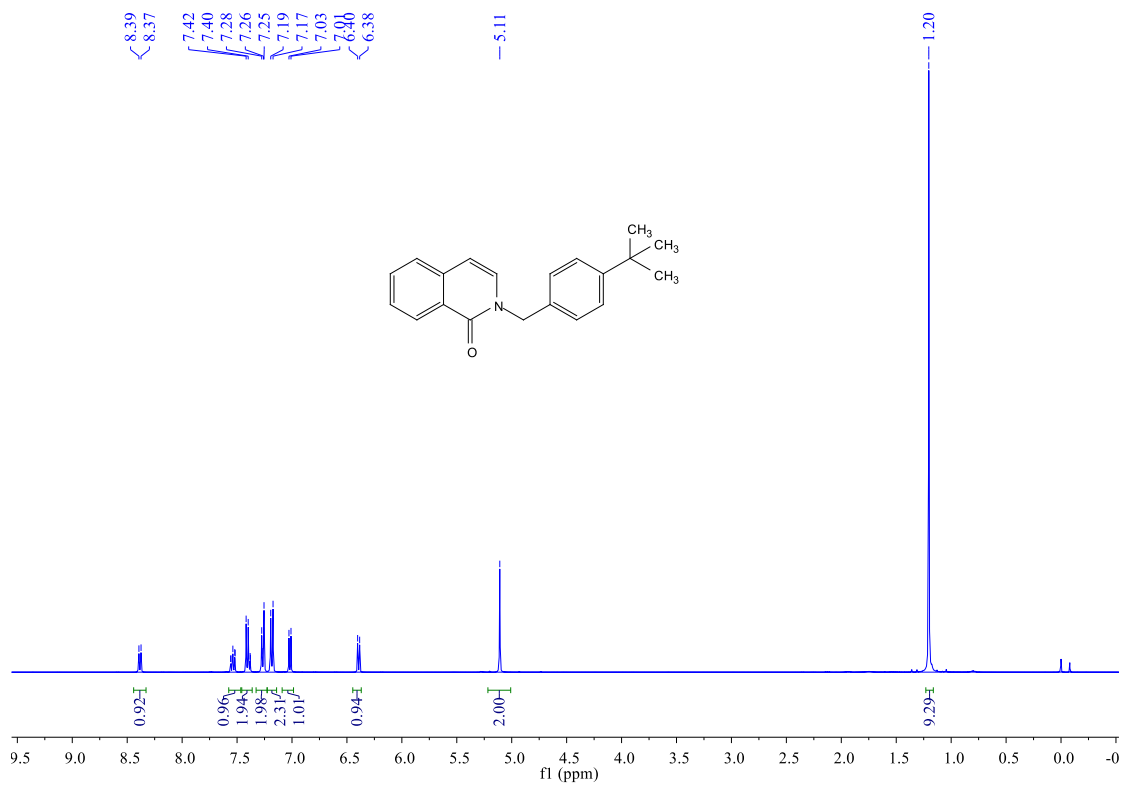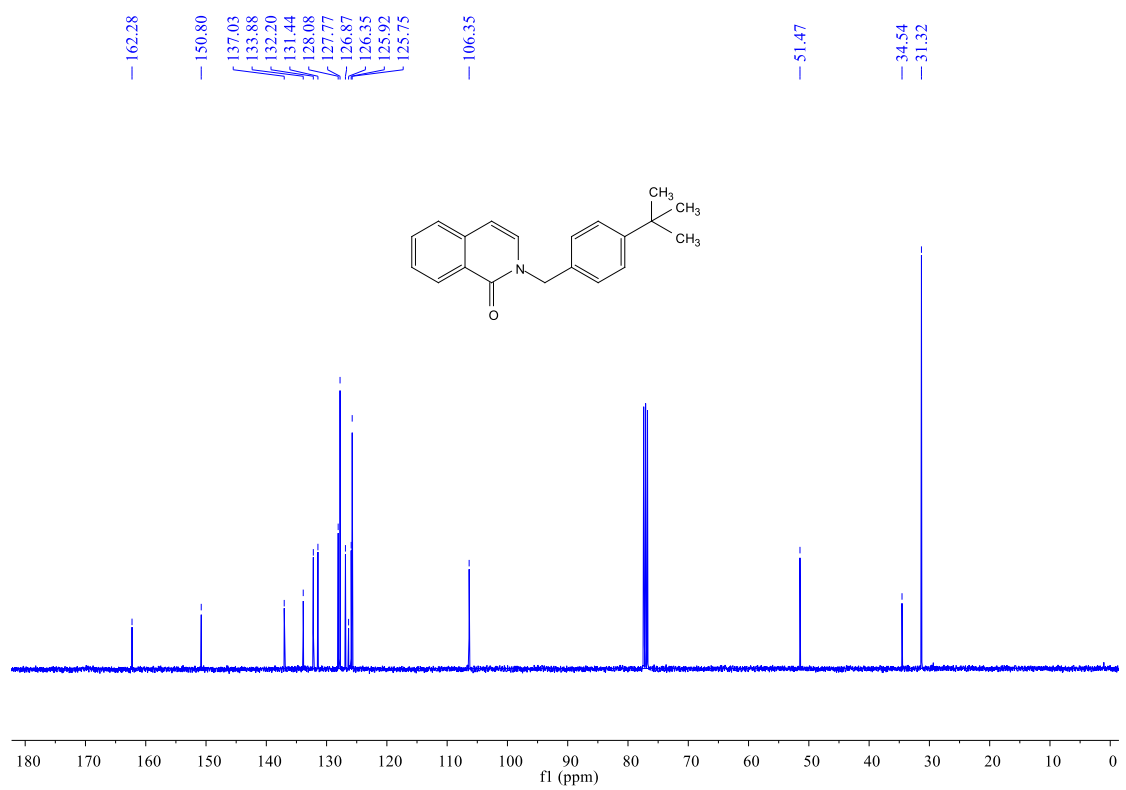

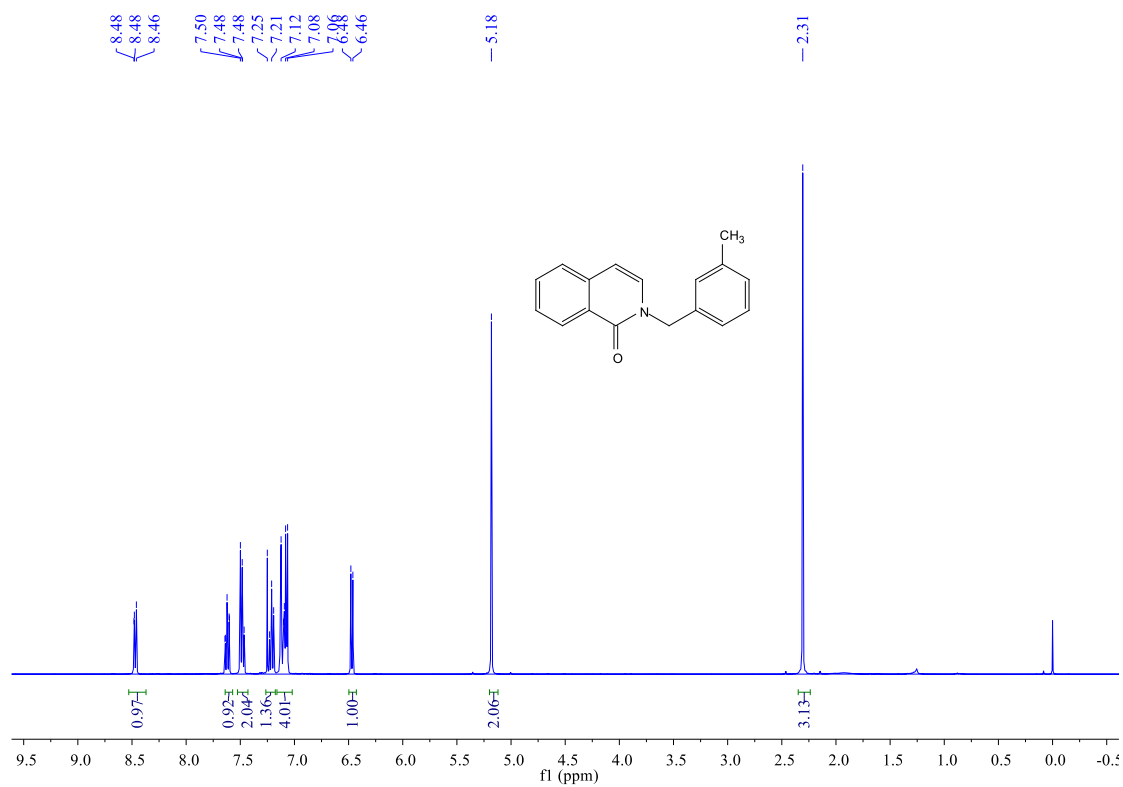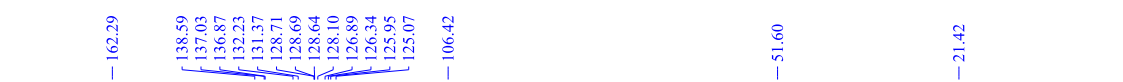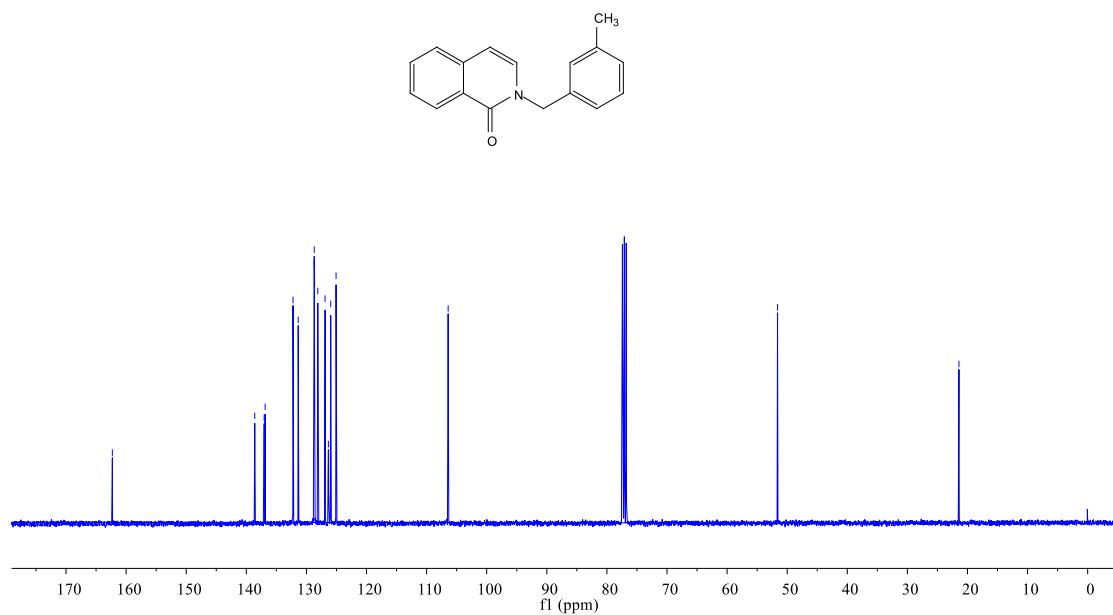

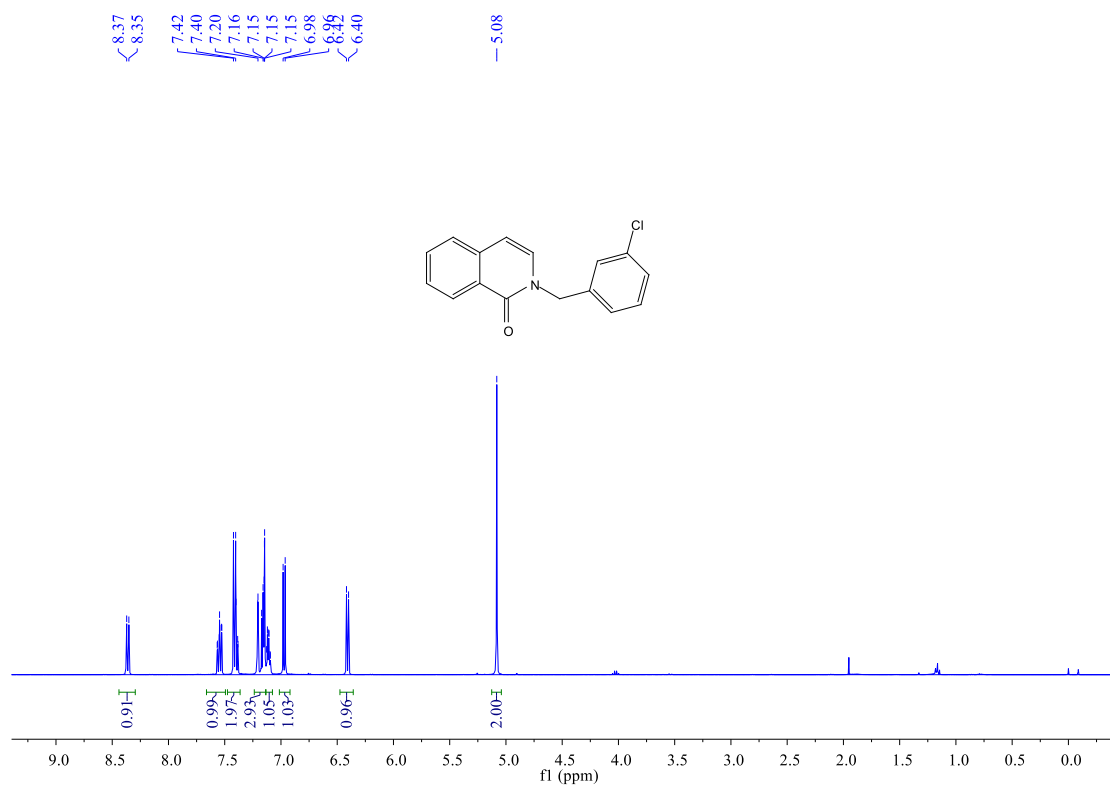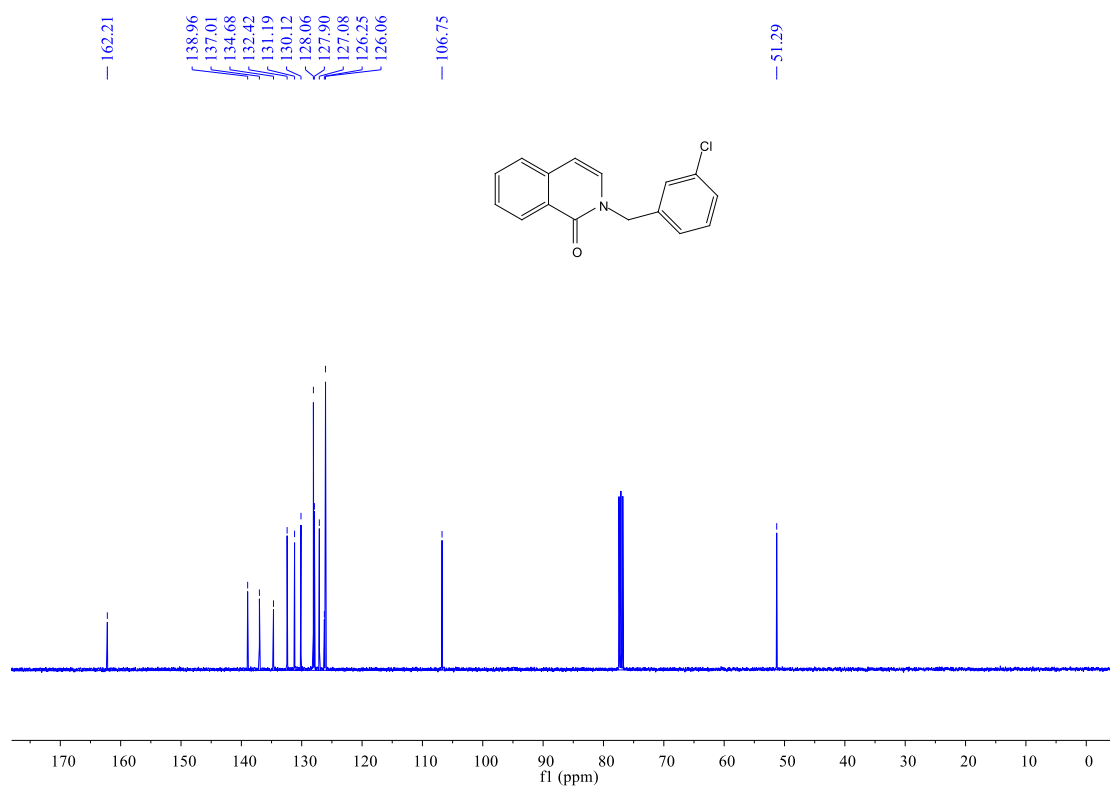

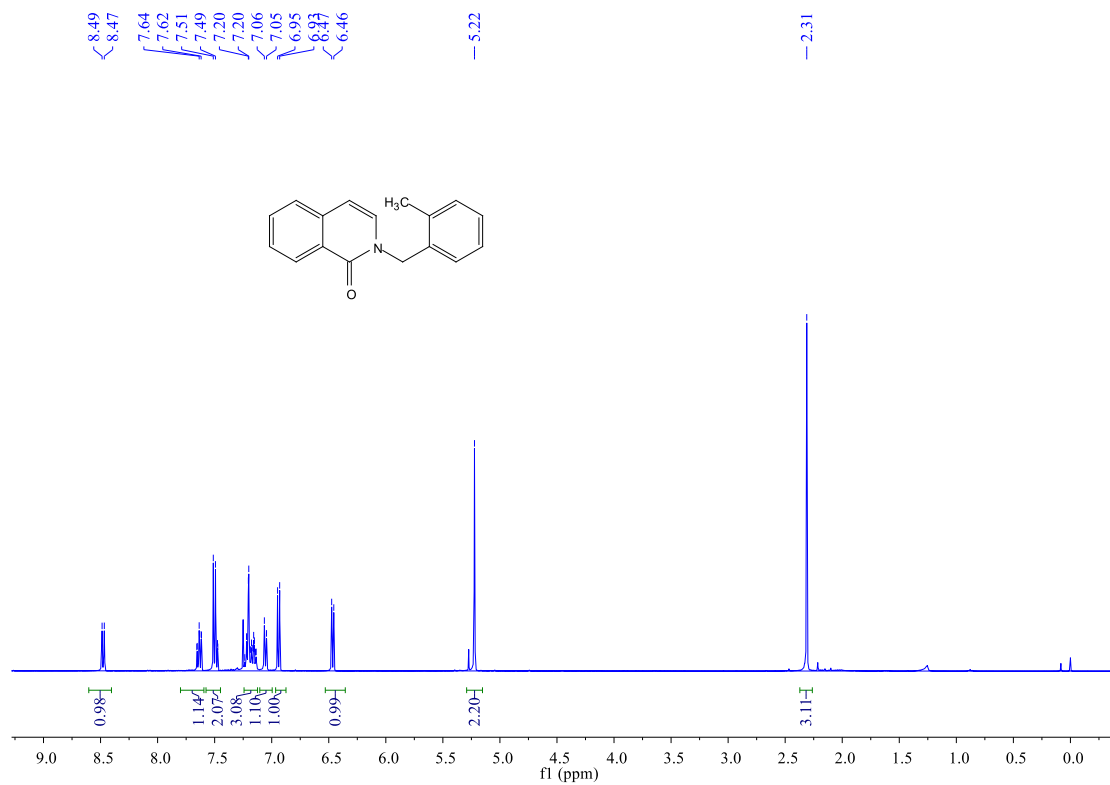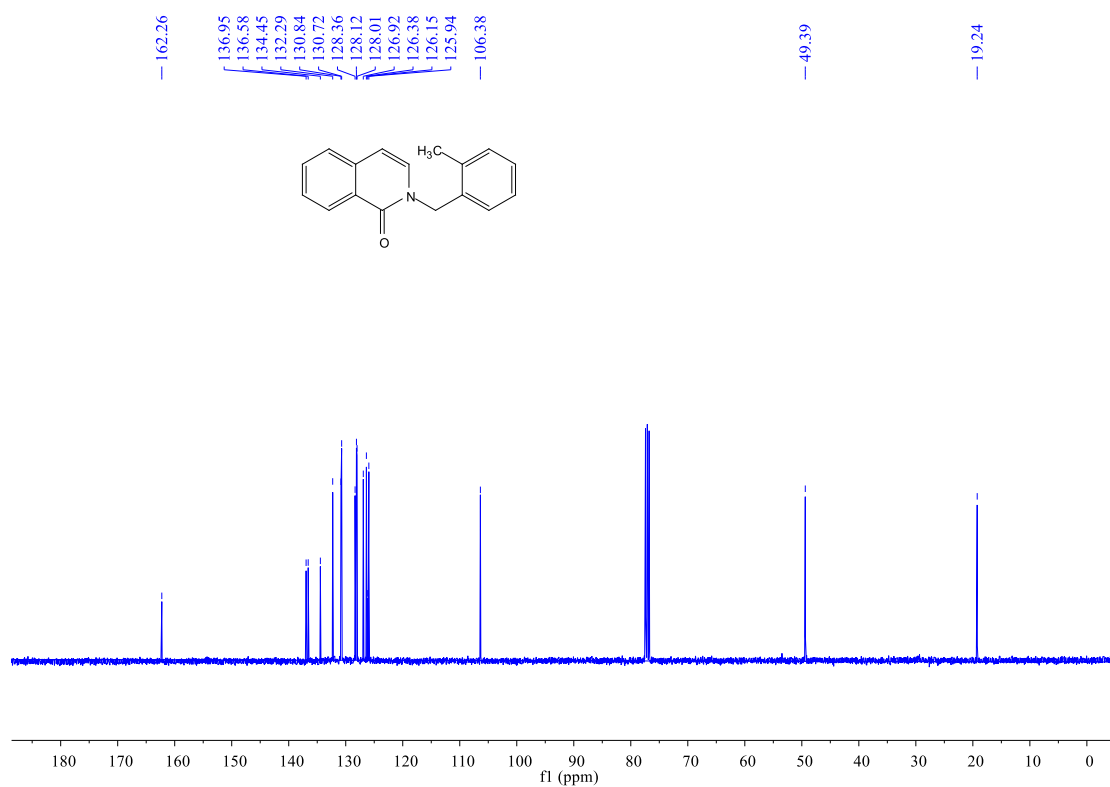

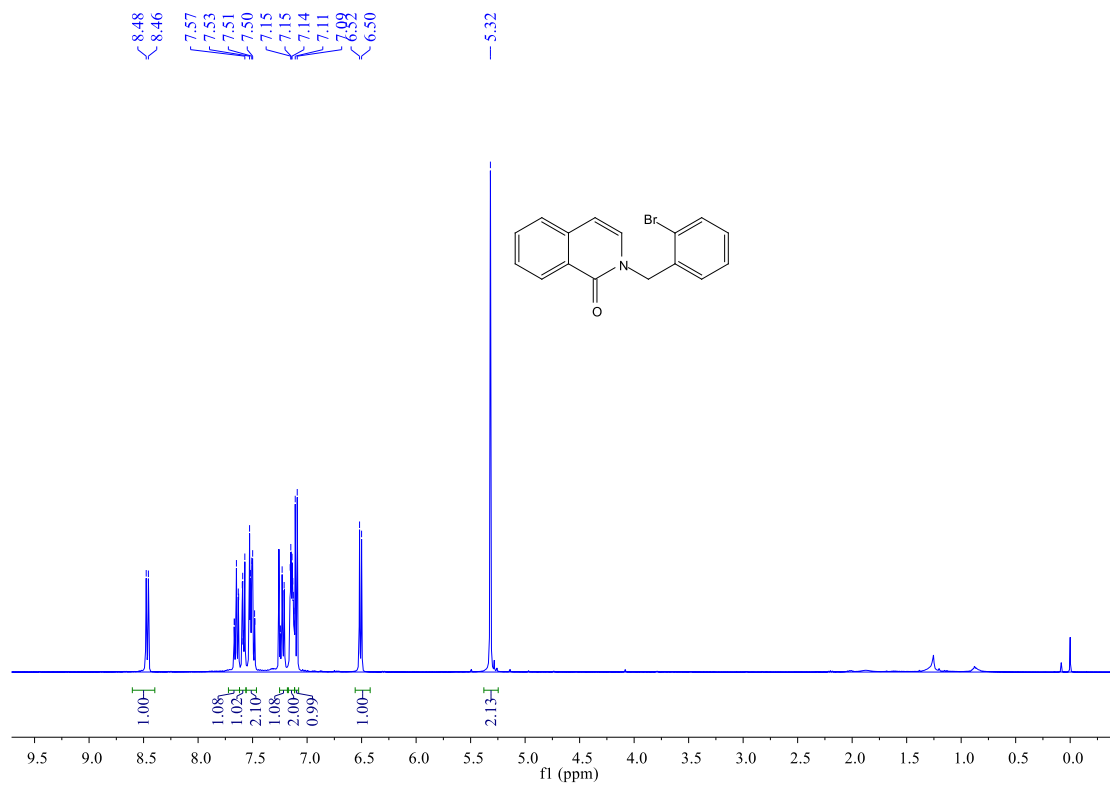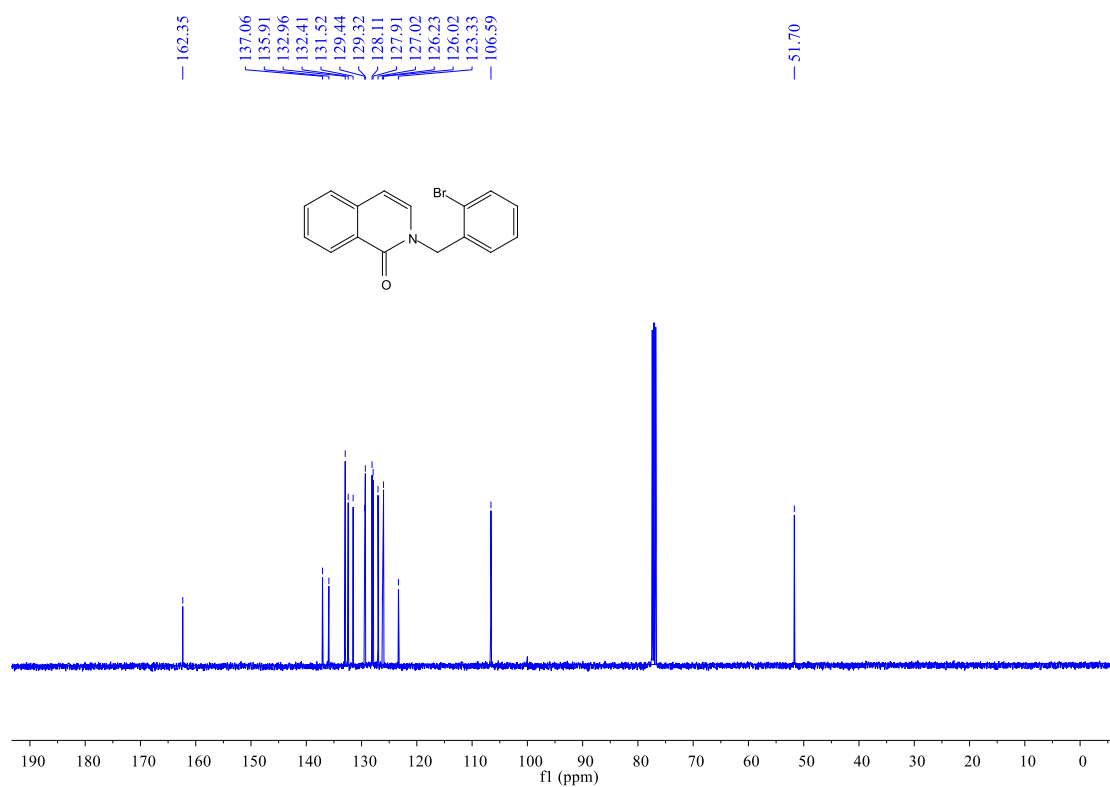

8.31  
8.29  
7.57  
7.55  
7.55  
7.45  
7.42  
7.40  
7.13  
6.47  
6.45  
5.13

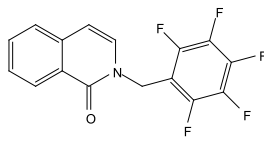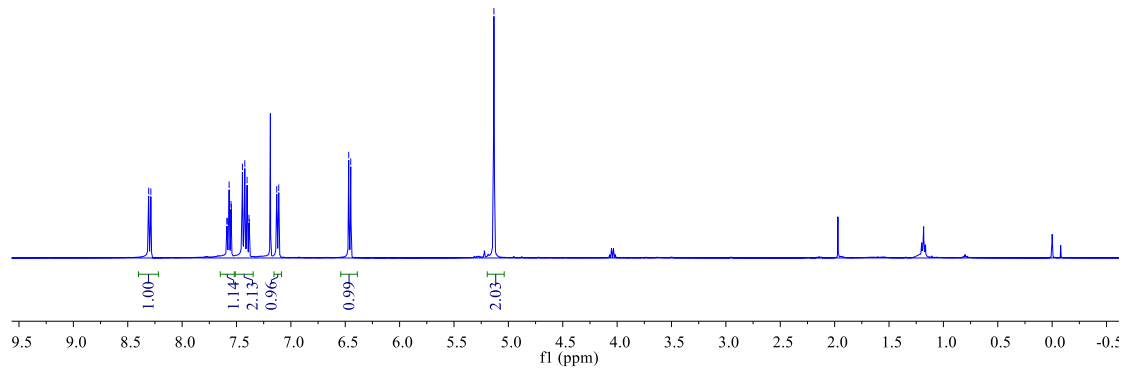

161.99  
136.97  
132.62  
131.37  
127.78  
127.22  
126.04  
125.97  
106.72  
41.48

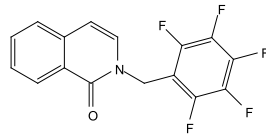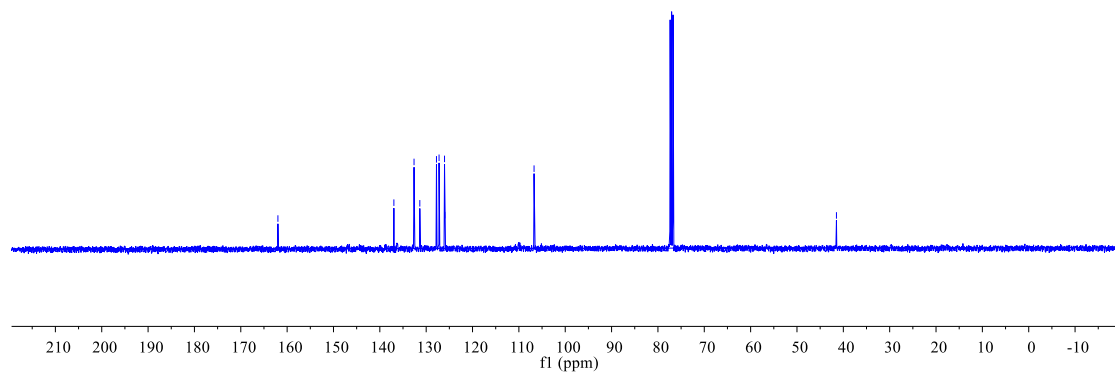



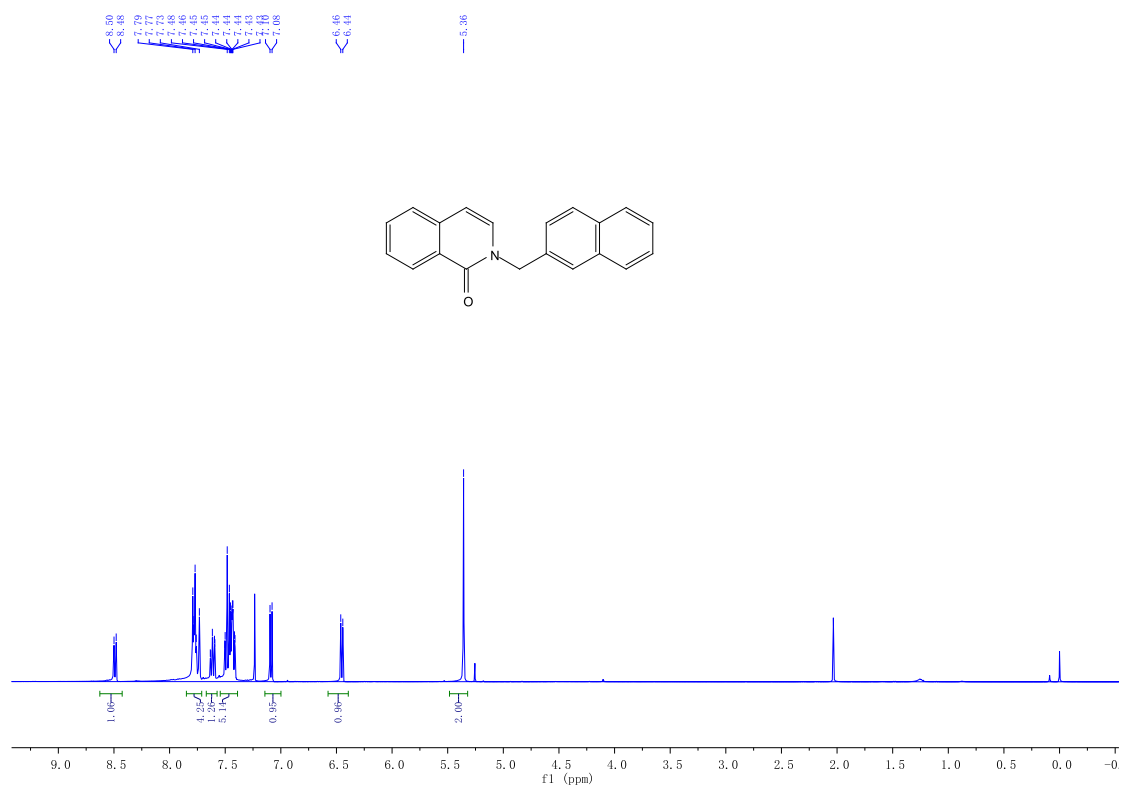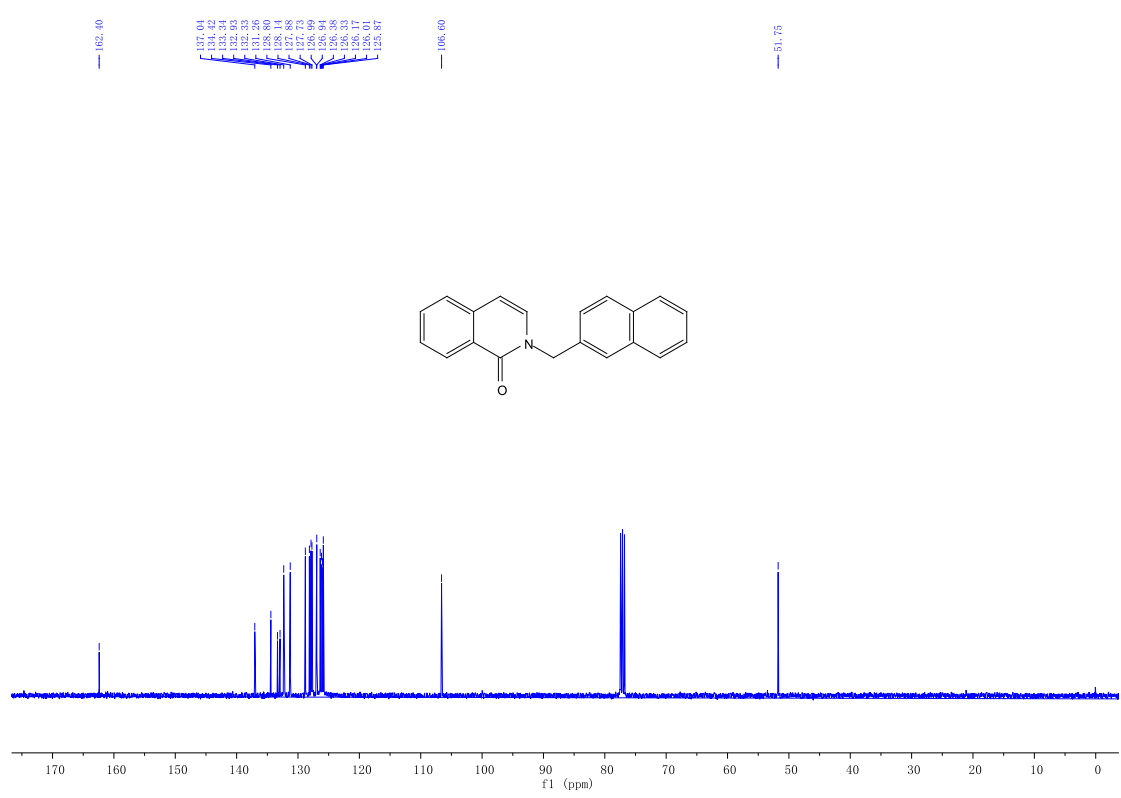

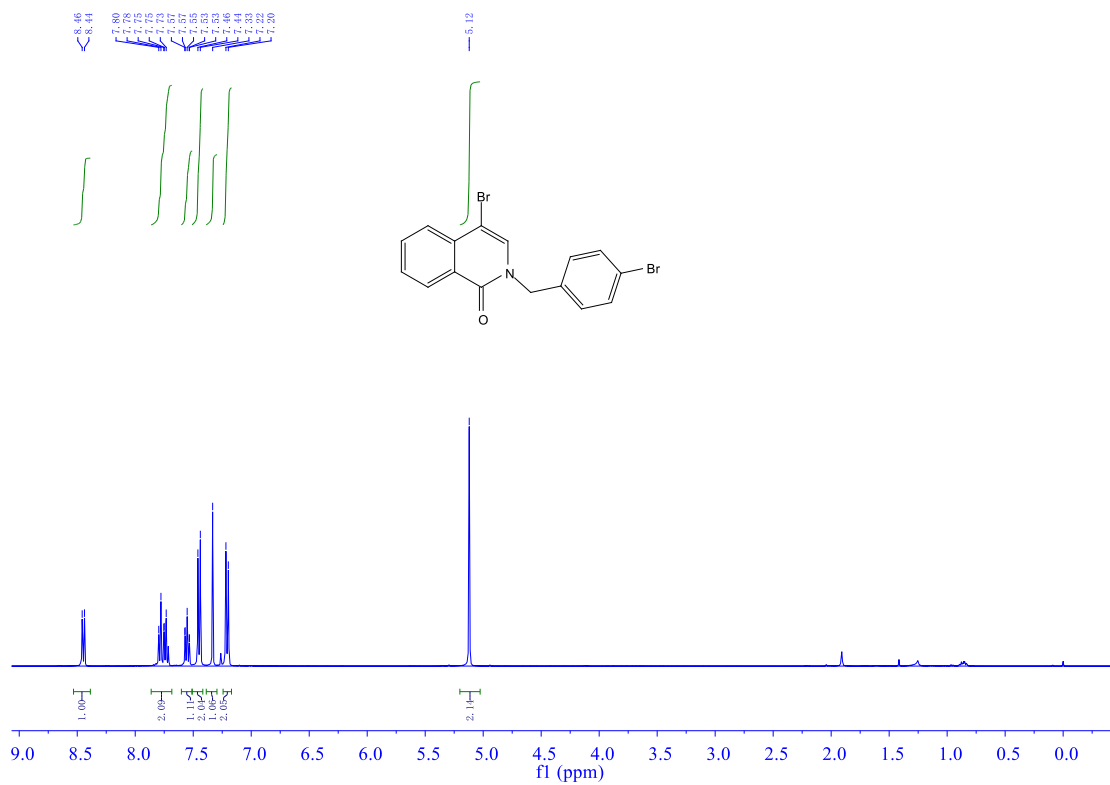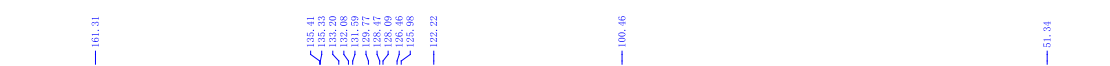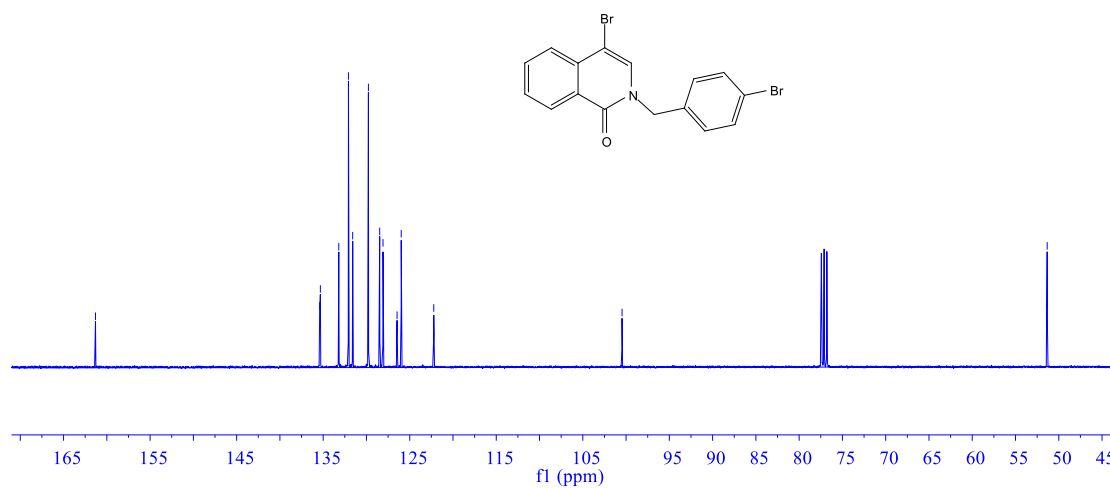

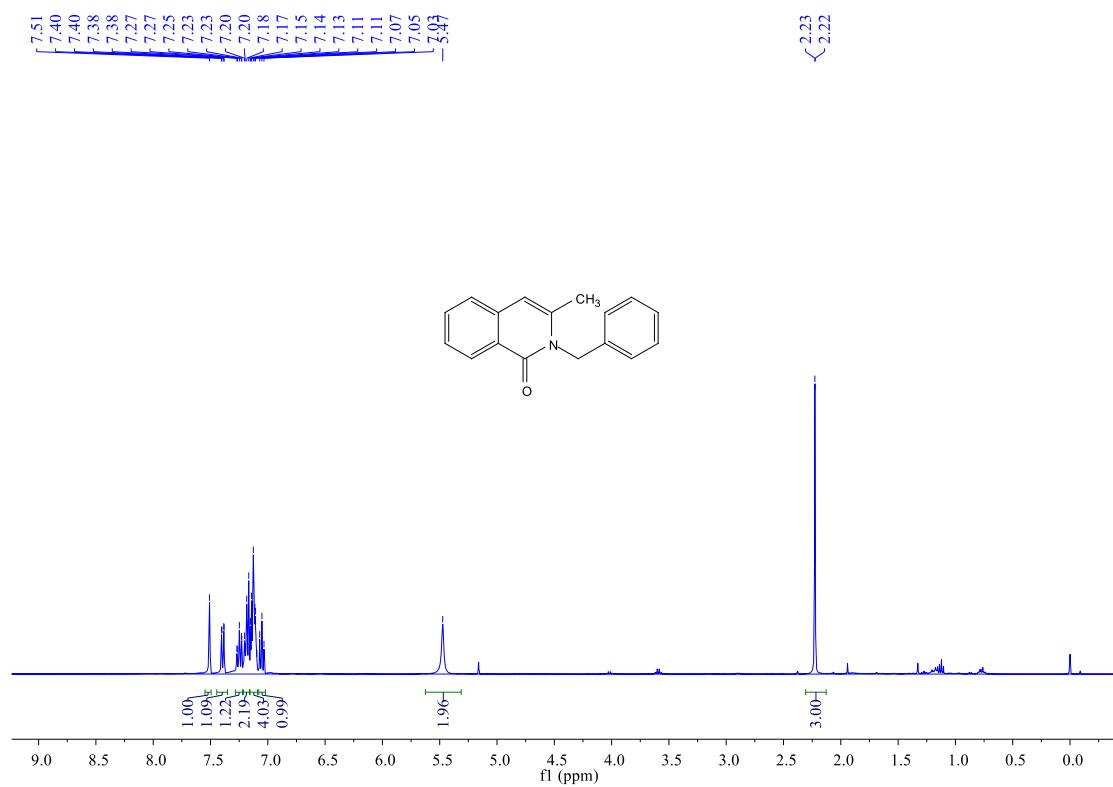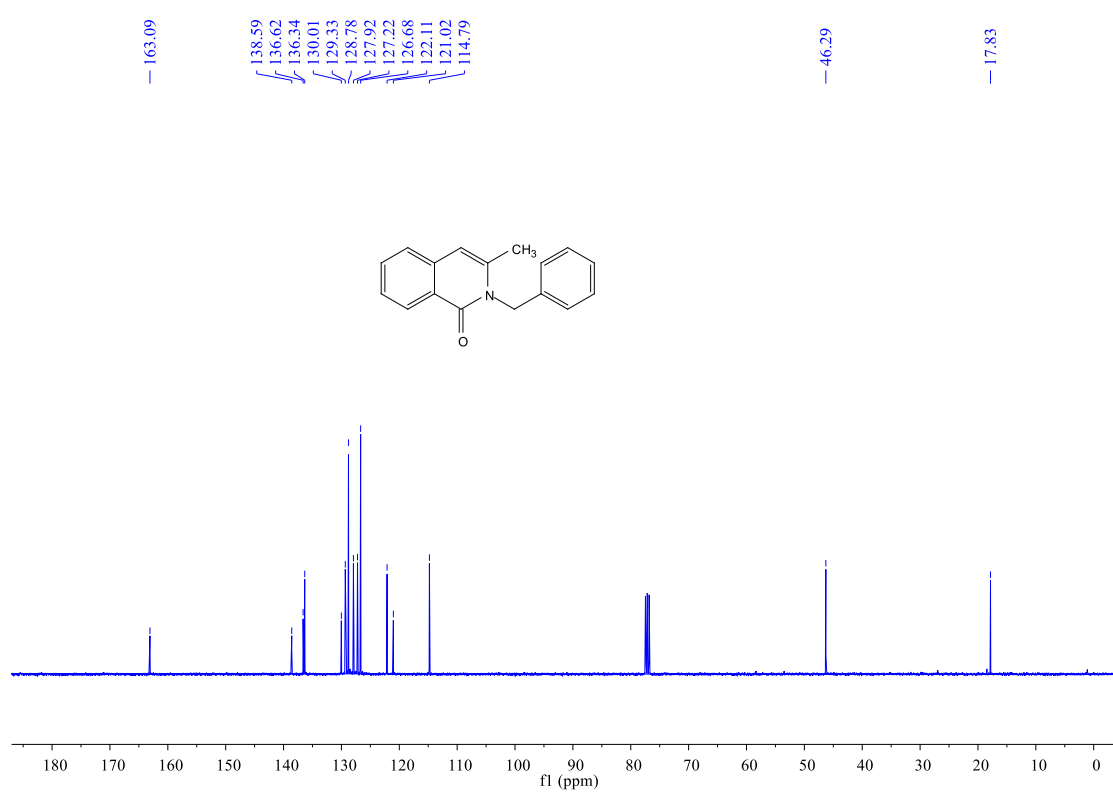

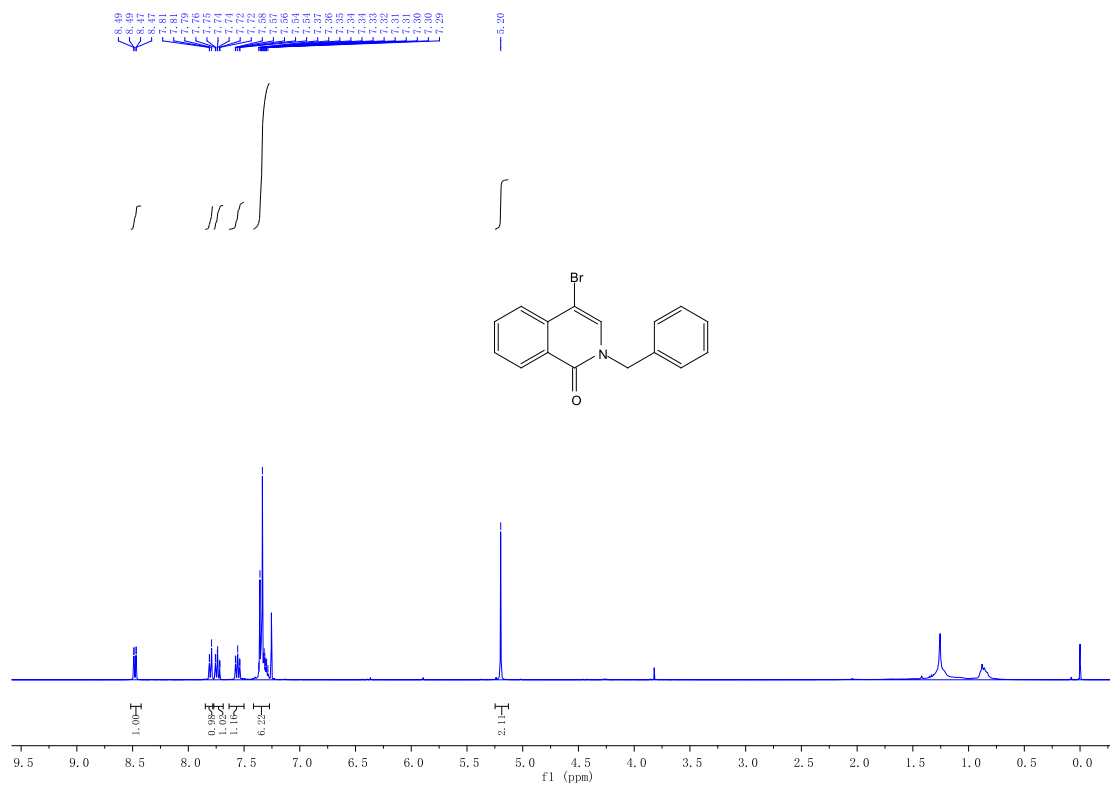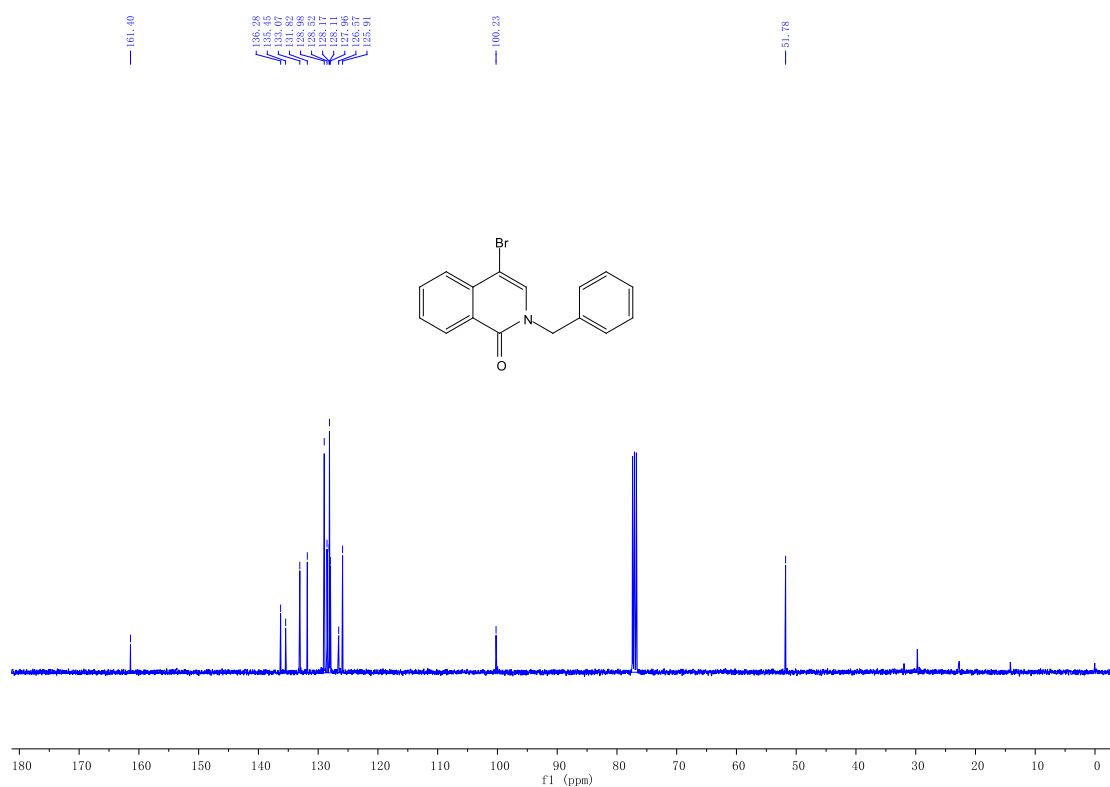



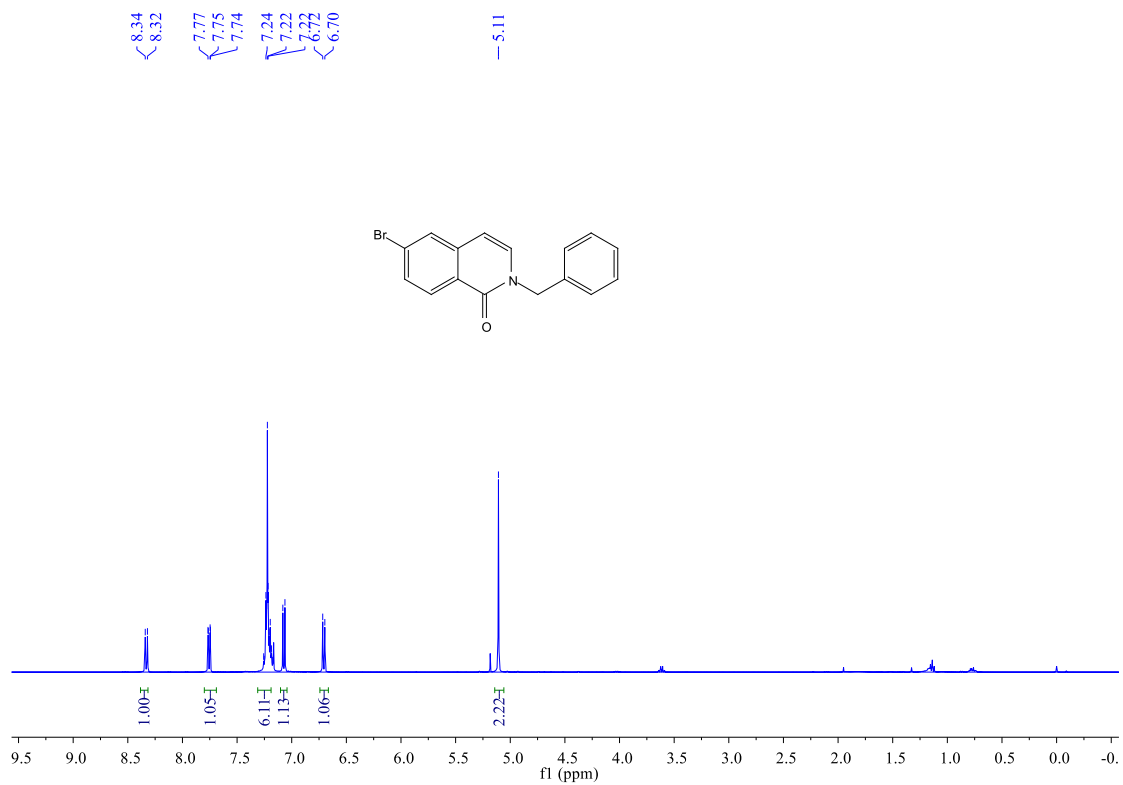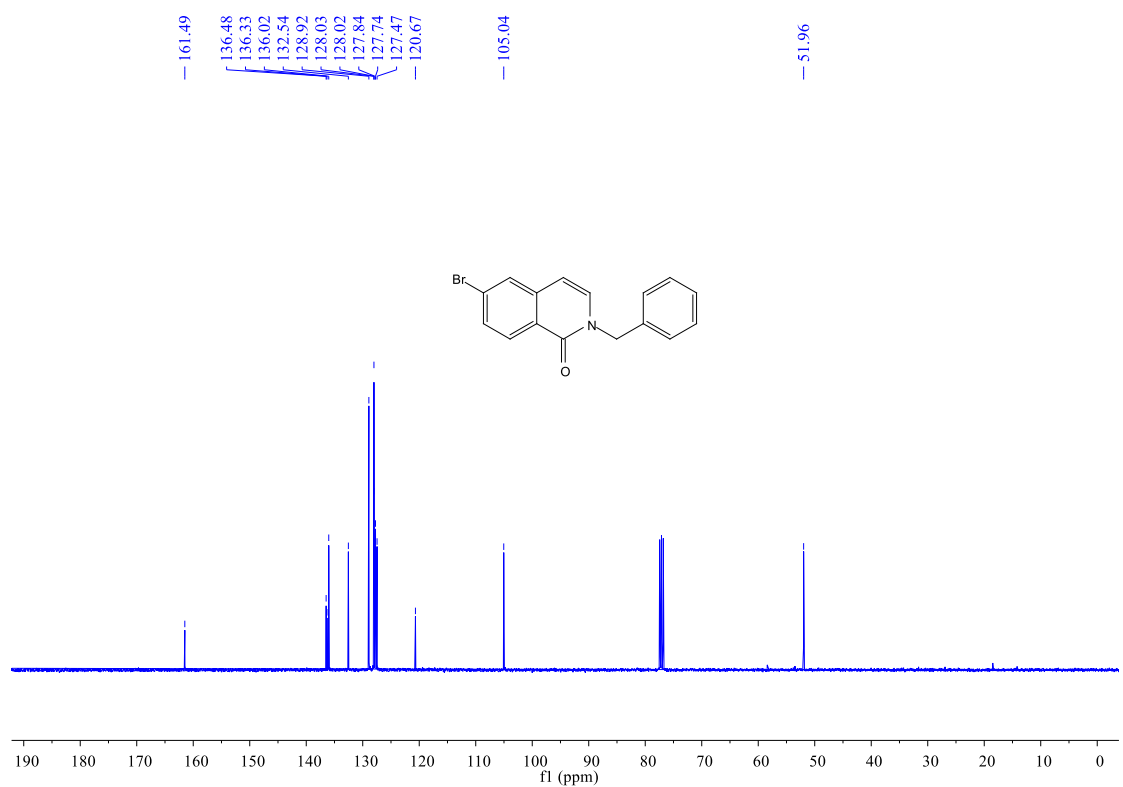

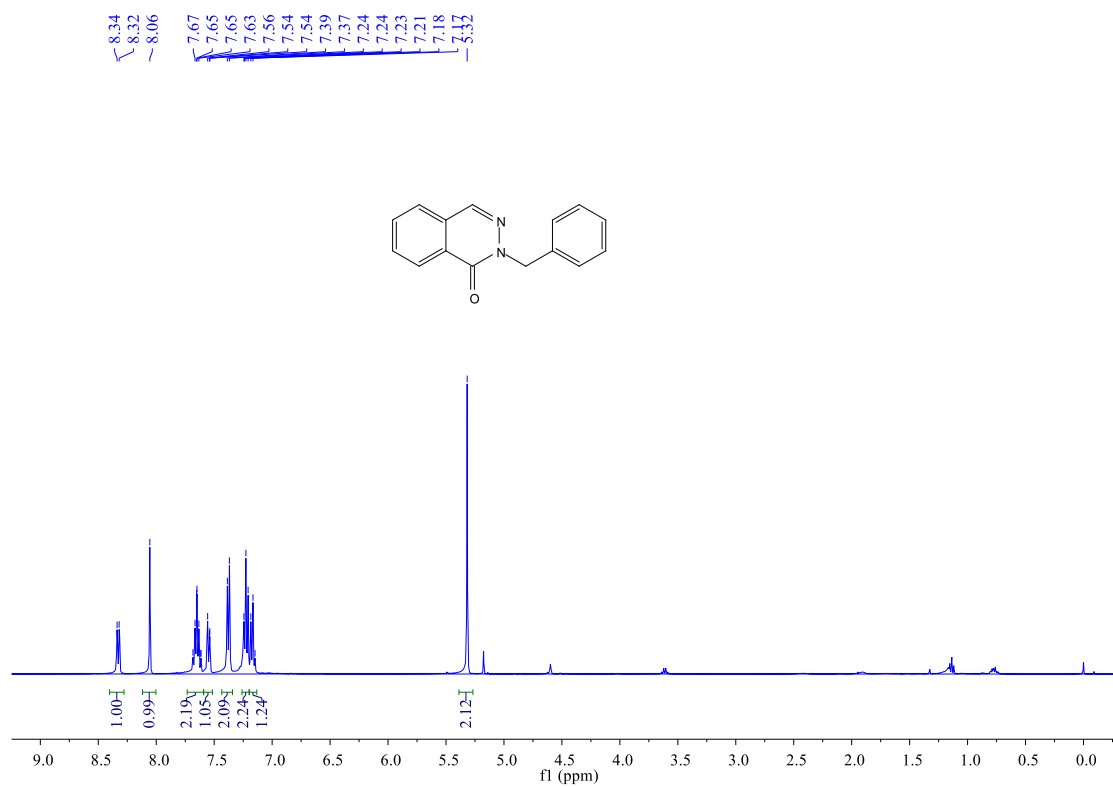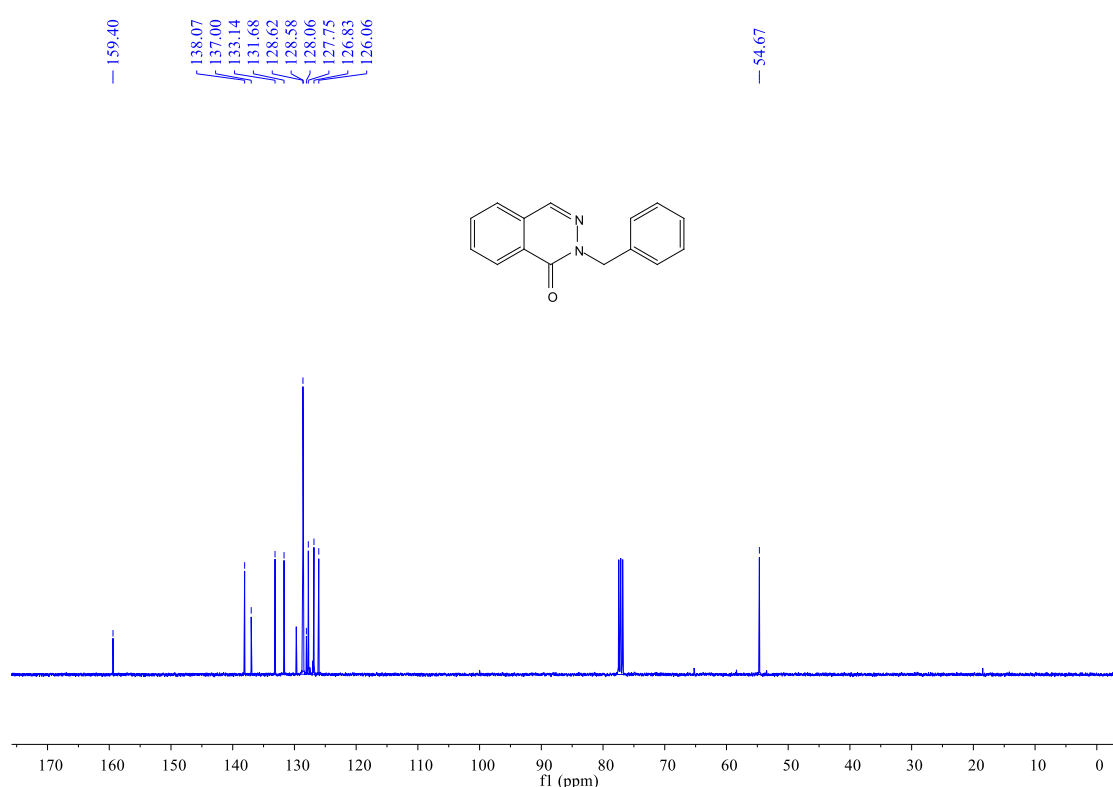

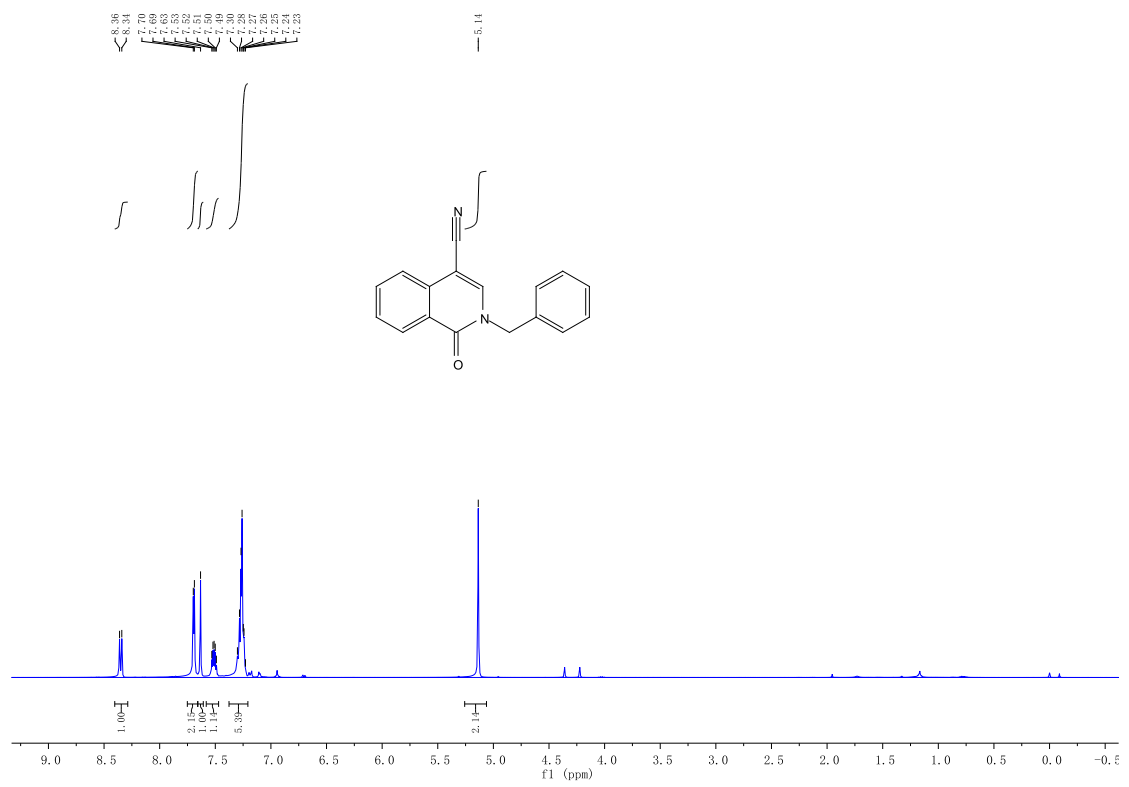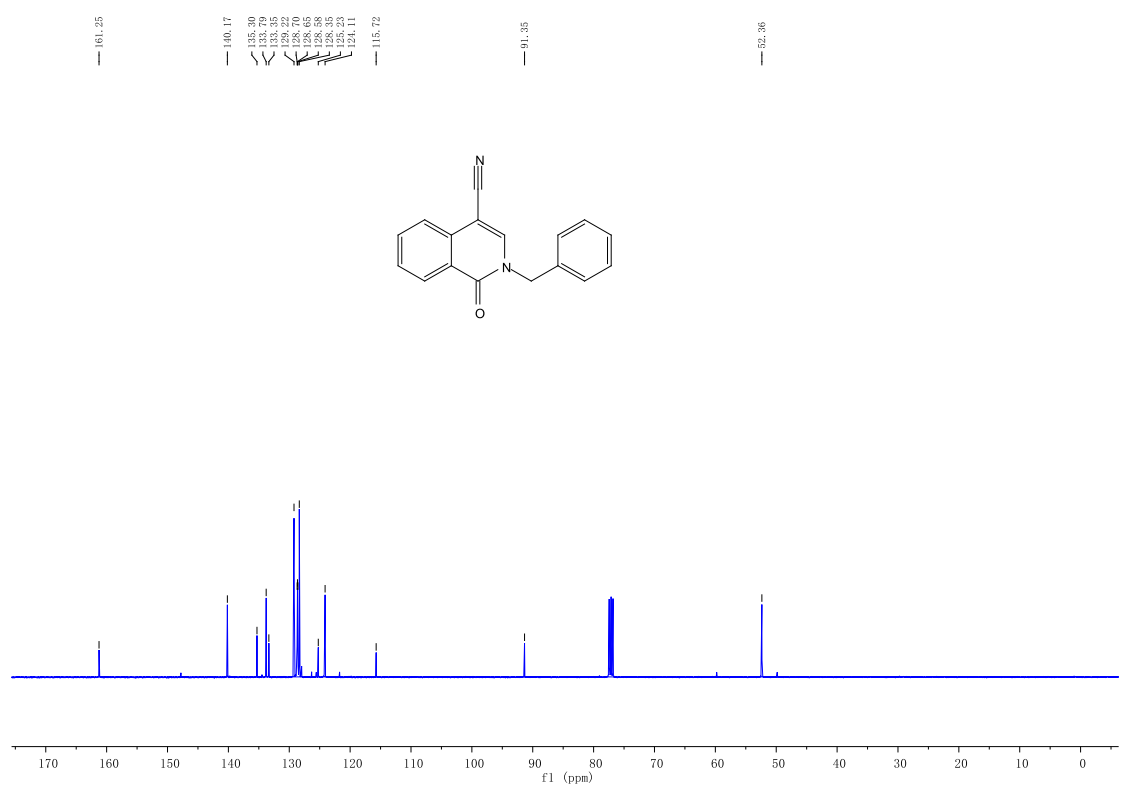



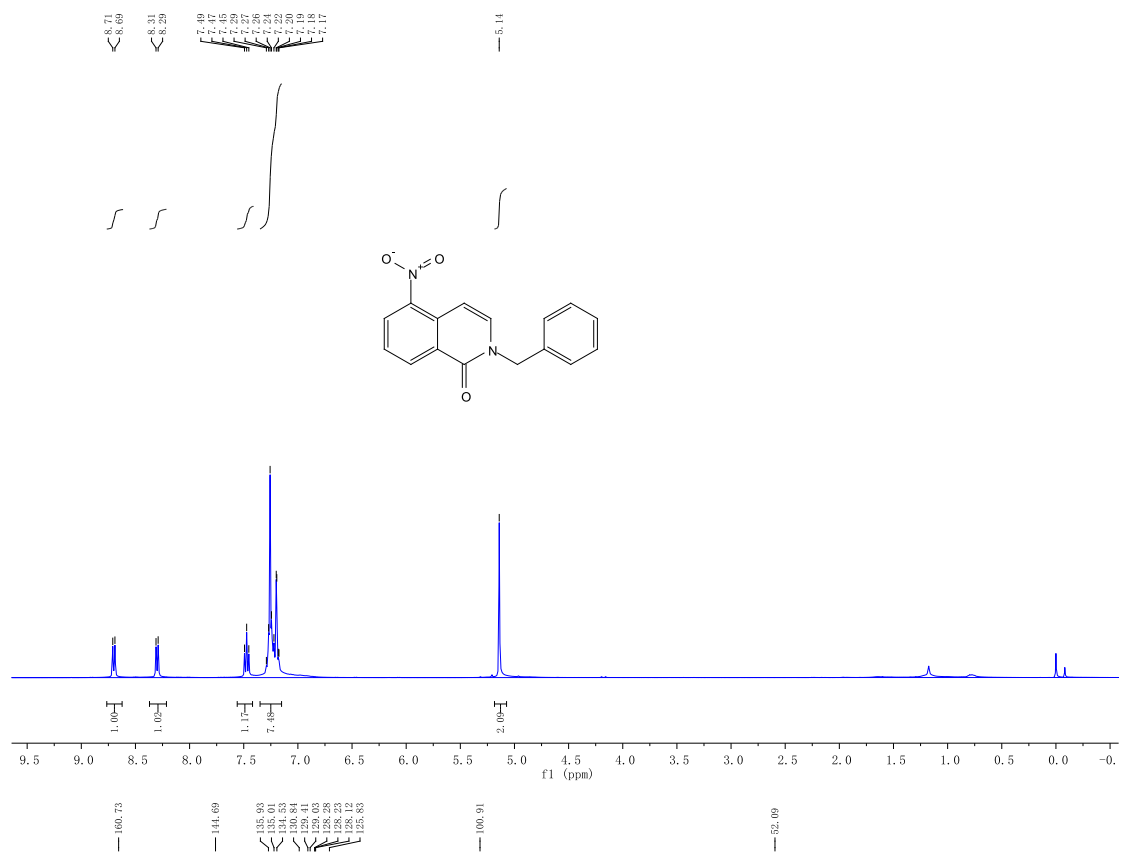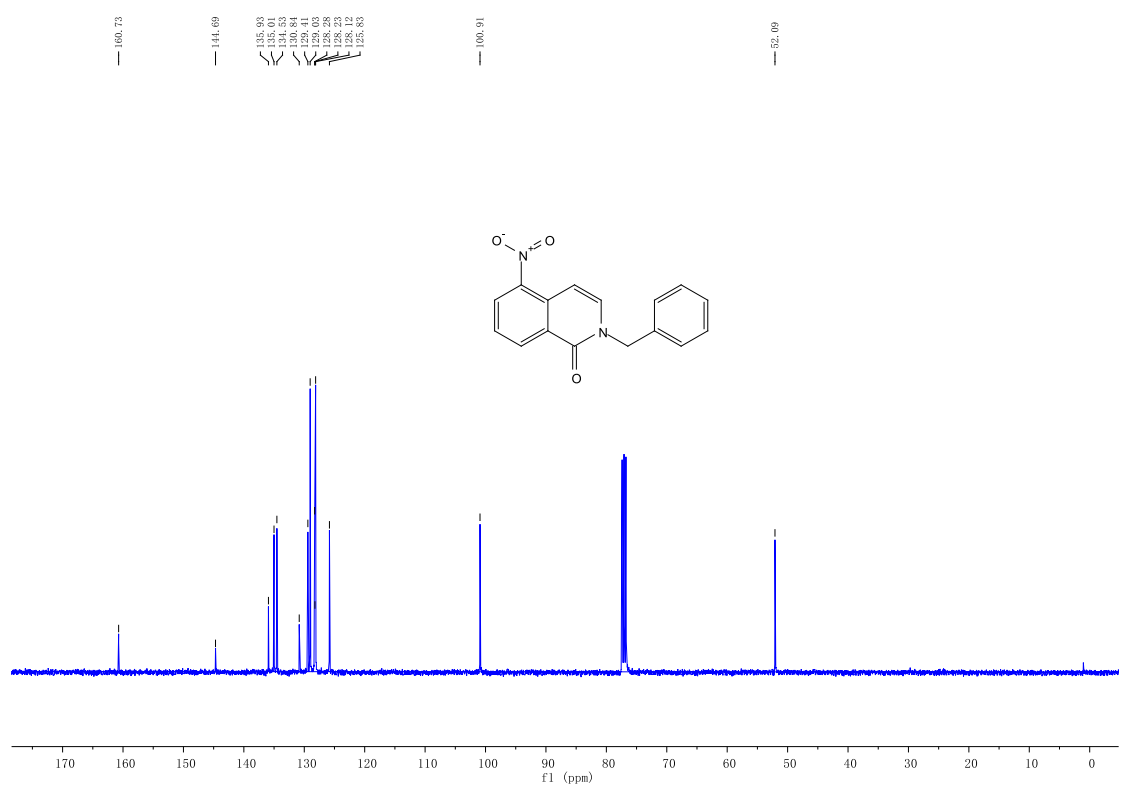

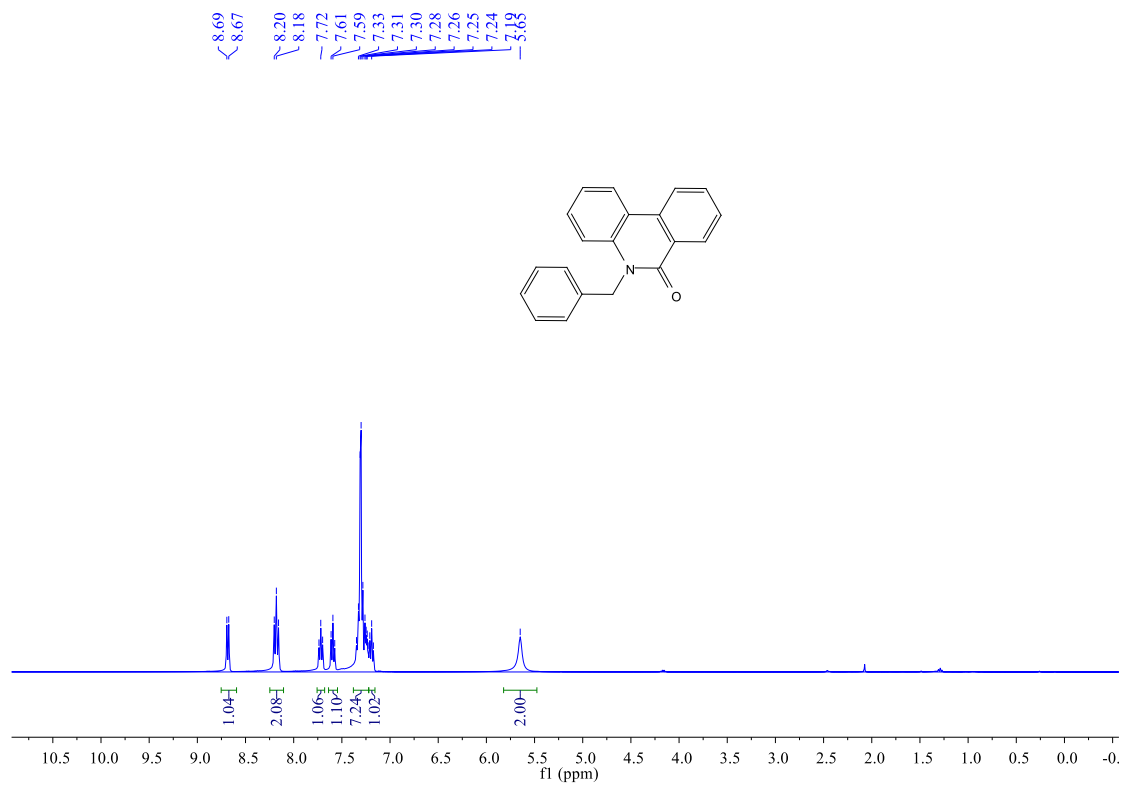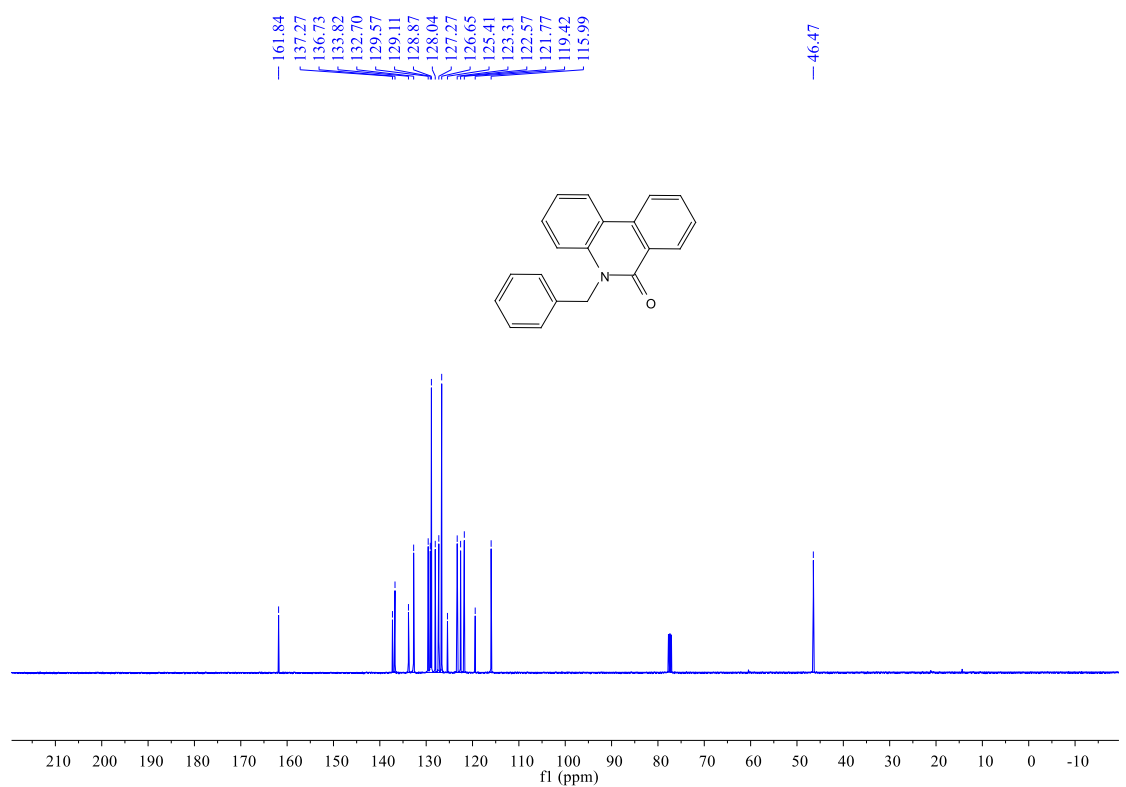

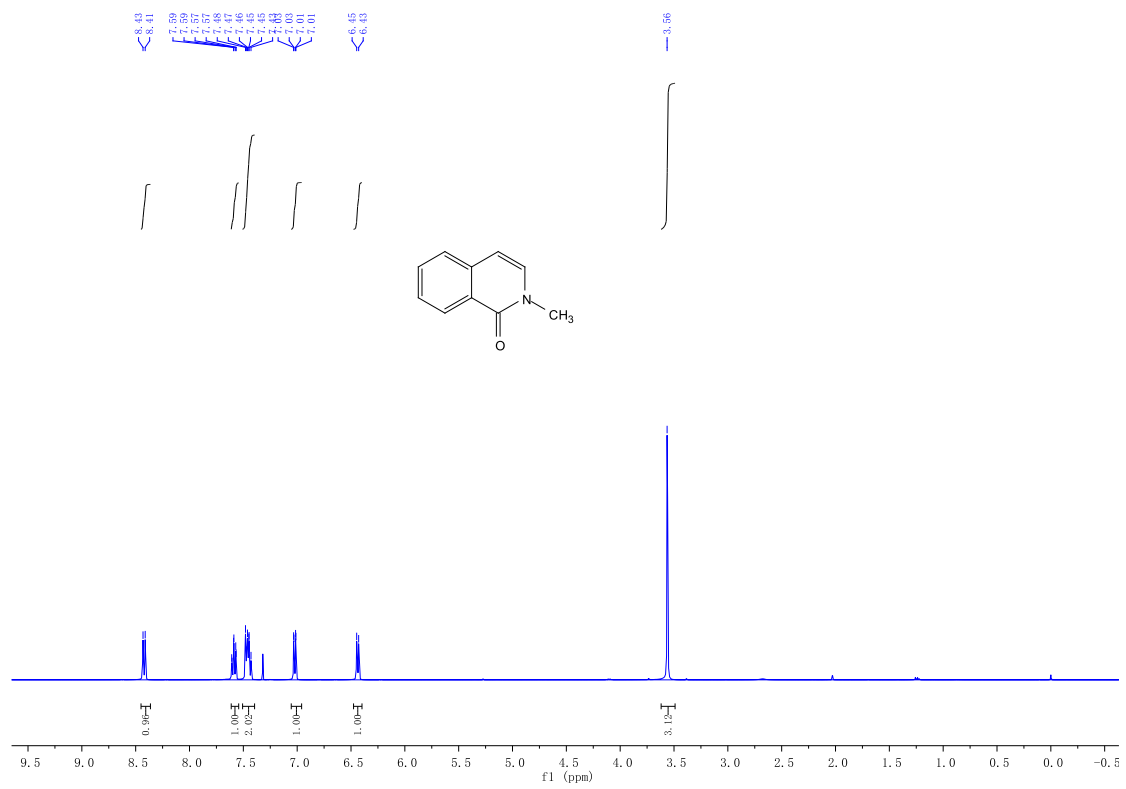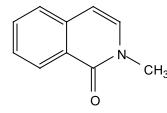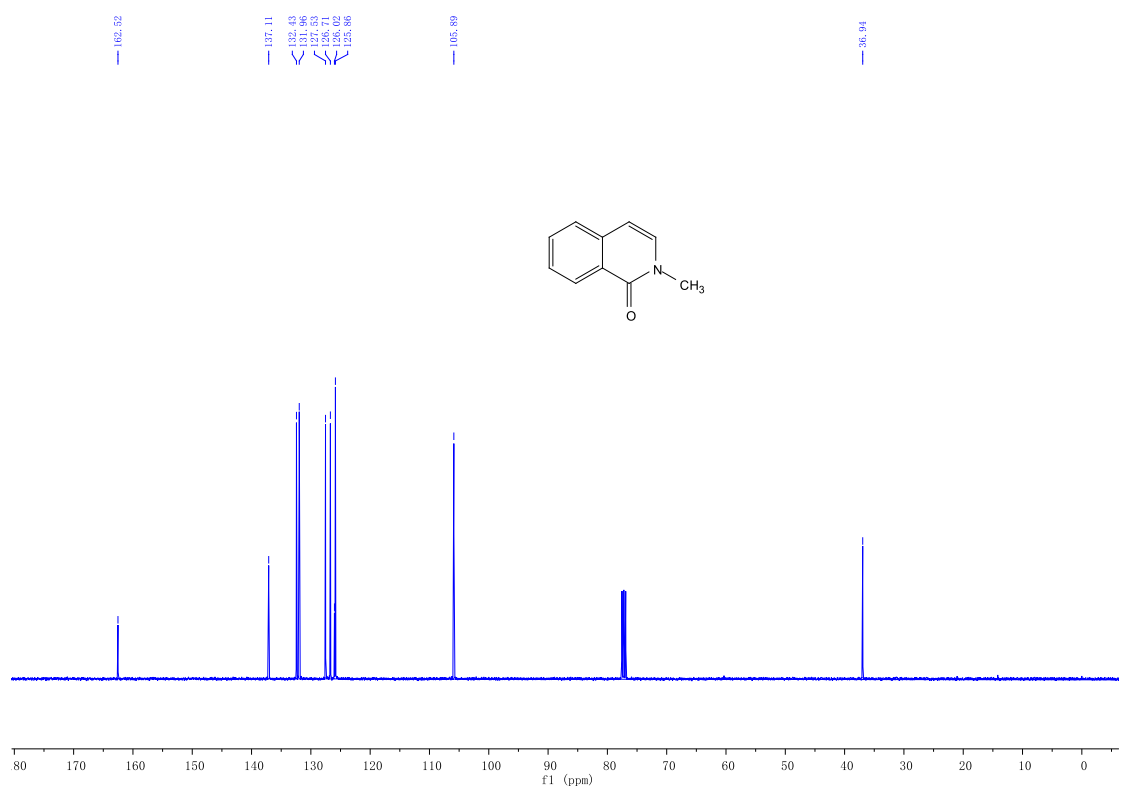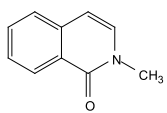

8.36  
8.34  
7.52  
7.50  
7.41  
7.40  
7.38  
6.97  
6.42  
6.40  
3.99  
3.97  
3.95  
3.93  
1.30  
1.28  
1.26

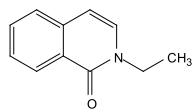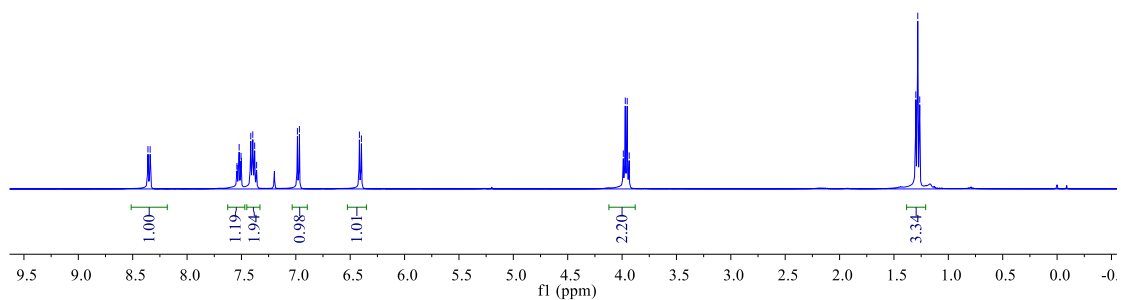

161.91  
137.03  
131.98  
131.18  
127.73  
126.71  
126.31  
125.83  
106.22  
44.29  
14.60

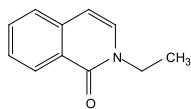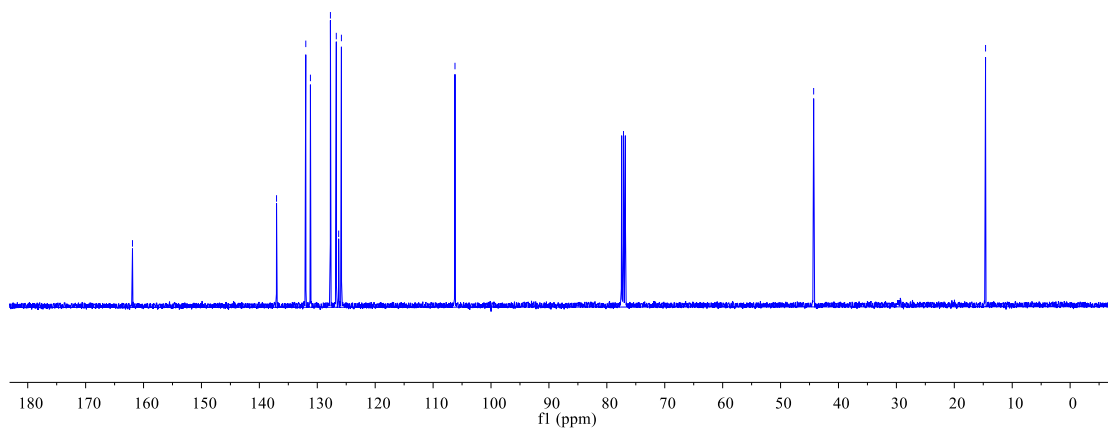

$\leftarrow$  8.36  
 $\leftarrow$  8.34  
 $\leftarrow$  7.53  
 $\leftarrow$  7.51  
 $\leftarrow$  7.42  
 $\leftarrow$  7.40  
 $\leftarrow$  7.38  
 $\leftarrow$  7.19  
 $\leftarrow$  6.98  
 $\leftarrow$  6.88  
 $\leftarrow$  6.39  
 $\leftarrow$  3.92  
 $\leftarrow$  3.90  
 $\leftarrow$  3.88  
 $\leftarrow$  1.70  
 $\leftarrow$  1.68  
 $\leftarrow$  1.66  
 $\leftarrow$  1.64  
 $\leftarrow$  1.30  
 $\leftarrow$  1.30  
 $\leftarrow$  1.28  
 $\leftarrow$  1.26  
 $\leftarrow$  1.24  
 $\leftarrow$  1.23  
 $\leftarrow$  1.23  
 $\leftarrow$  1.22  
 $\leftarrow$  1.22  
 $\leftarrow$  1.21  
 $\leftarrow$  1.20  
 $\leftarrow$  0.81  
 $\leftarrow$  0.79  
 $\leftarrow$  0.77

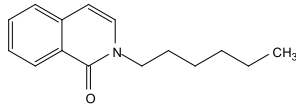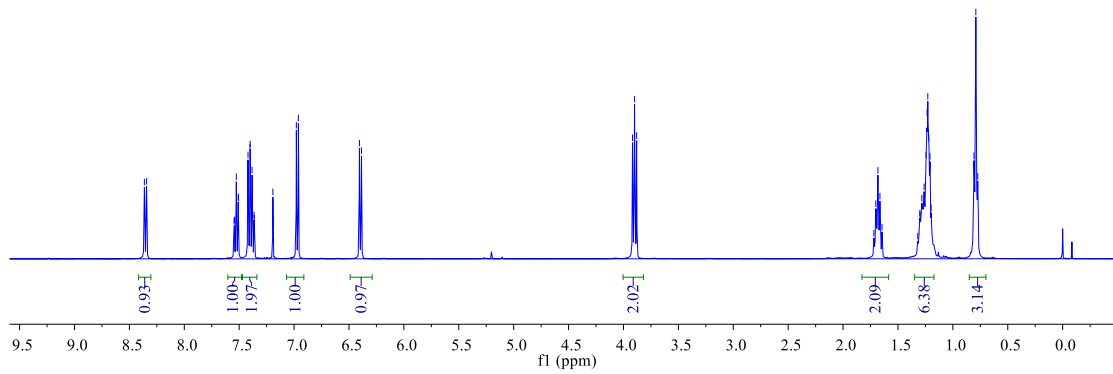

— 162.06  
 — 137.01  
 — 131.97  
 — 131.74  
 — 127.81  
 — 126.69  
 — 126.33  
 — 125.80  
 — 105.88  
 — 49.44  
 — 31.49  
 — 29.28  
 — 26.44  
 — 22.53  
 — 14.03

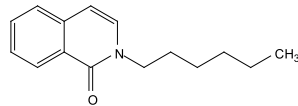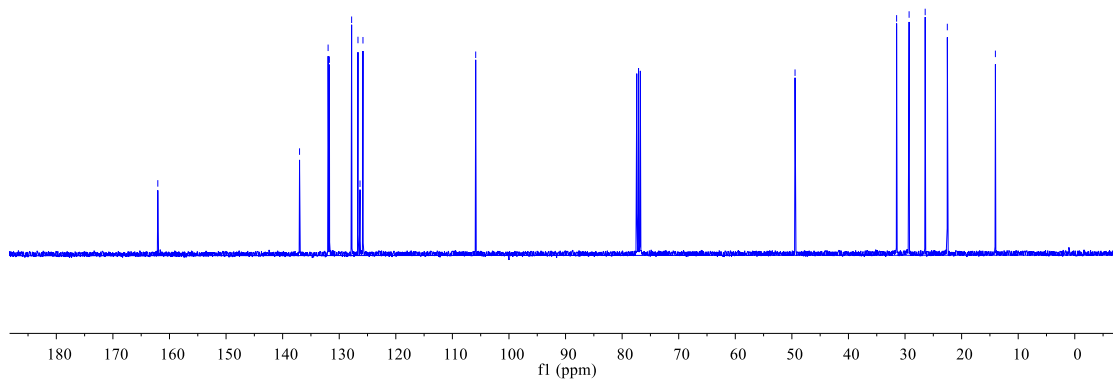

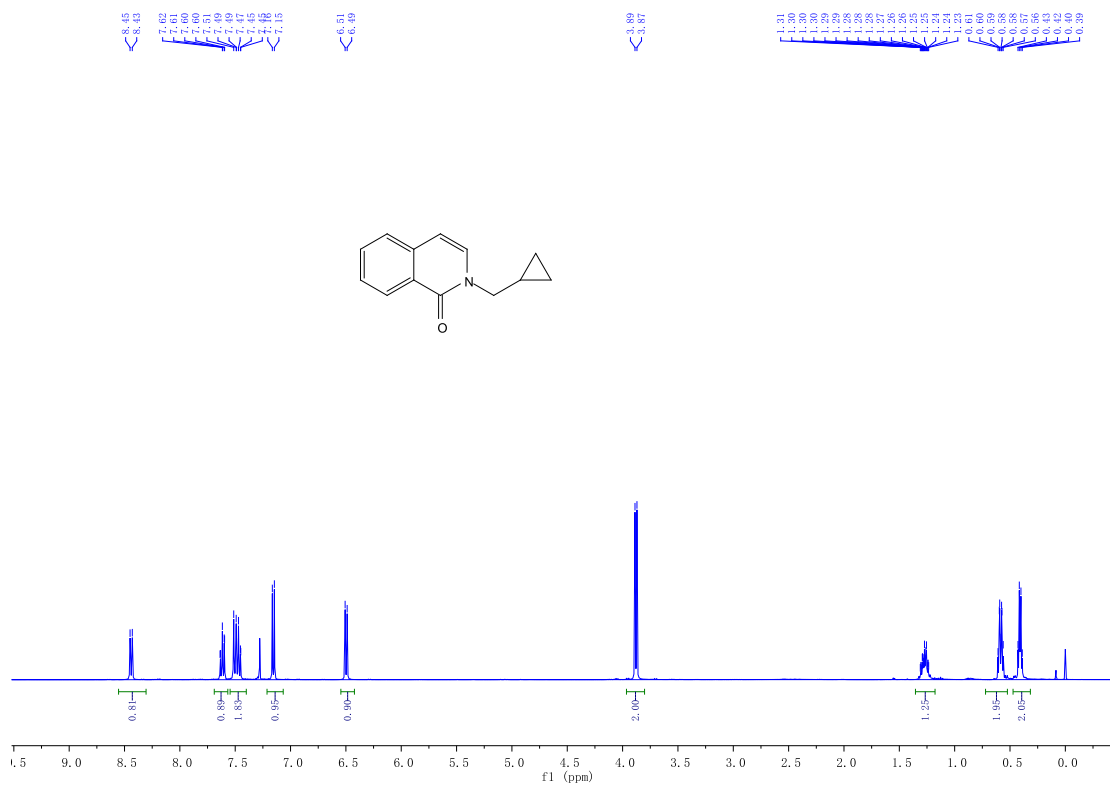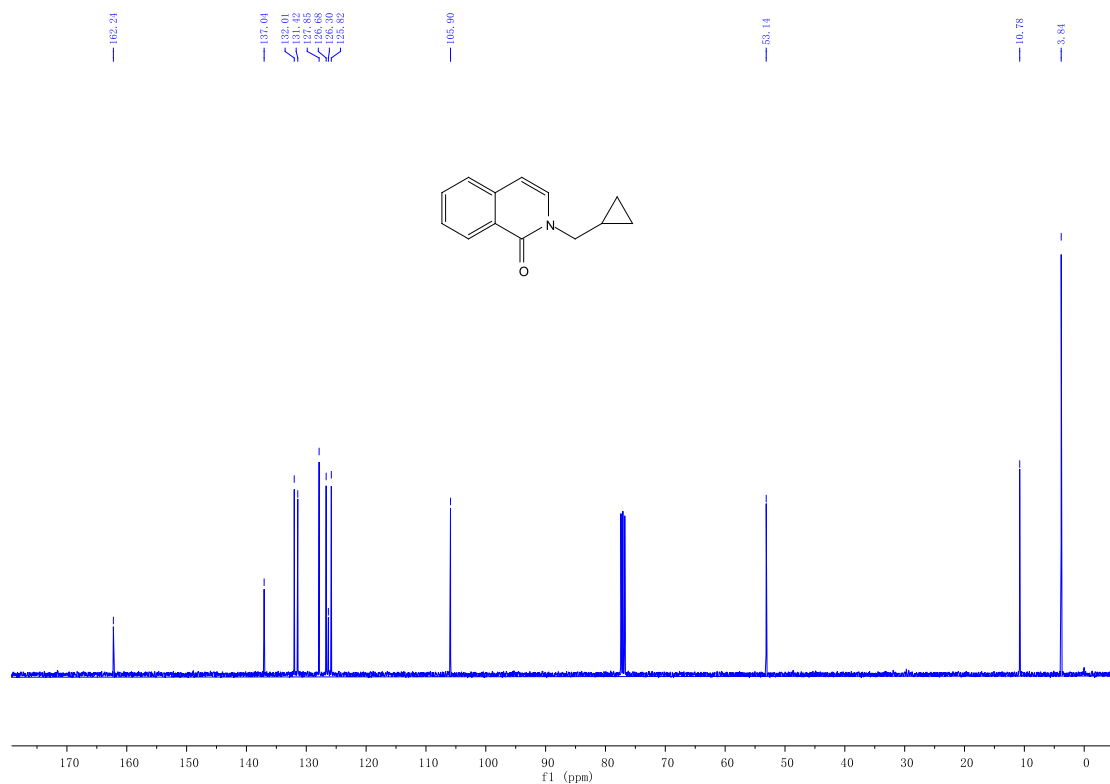

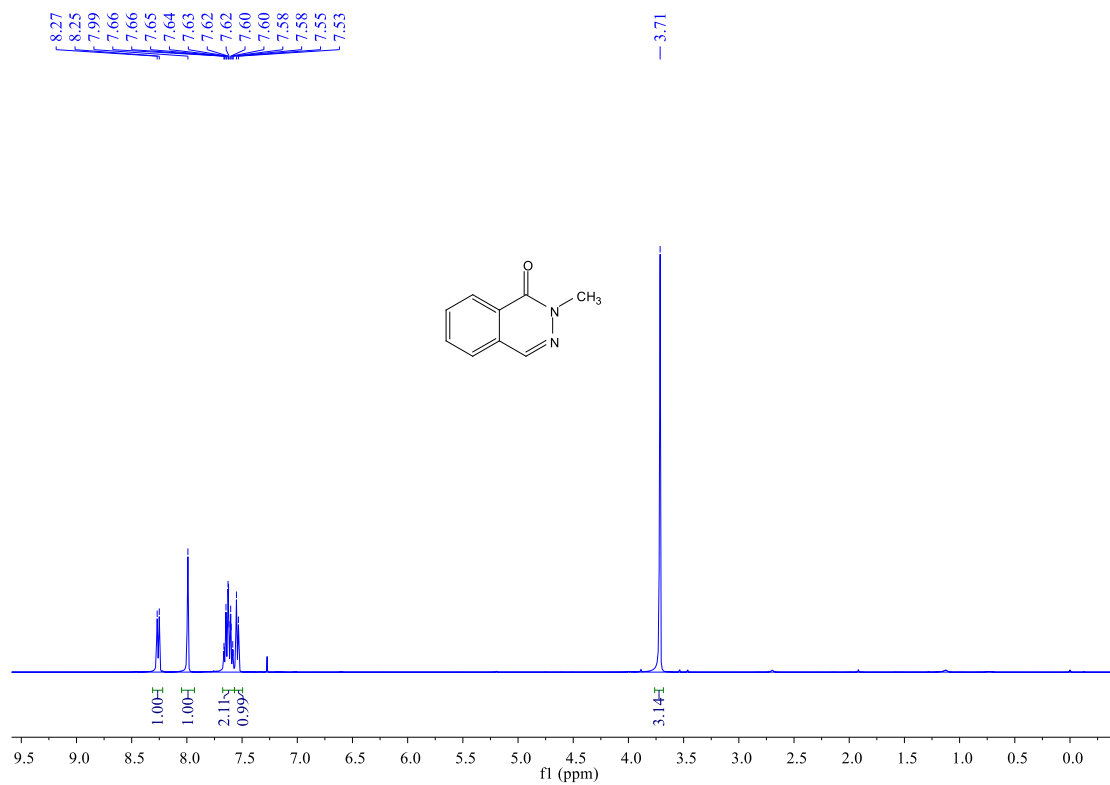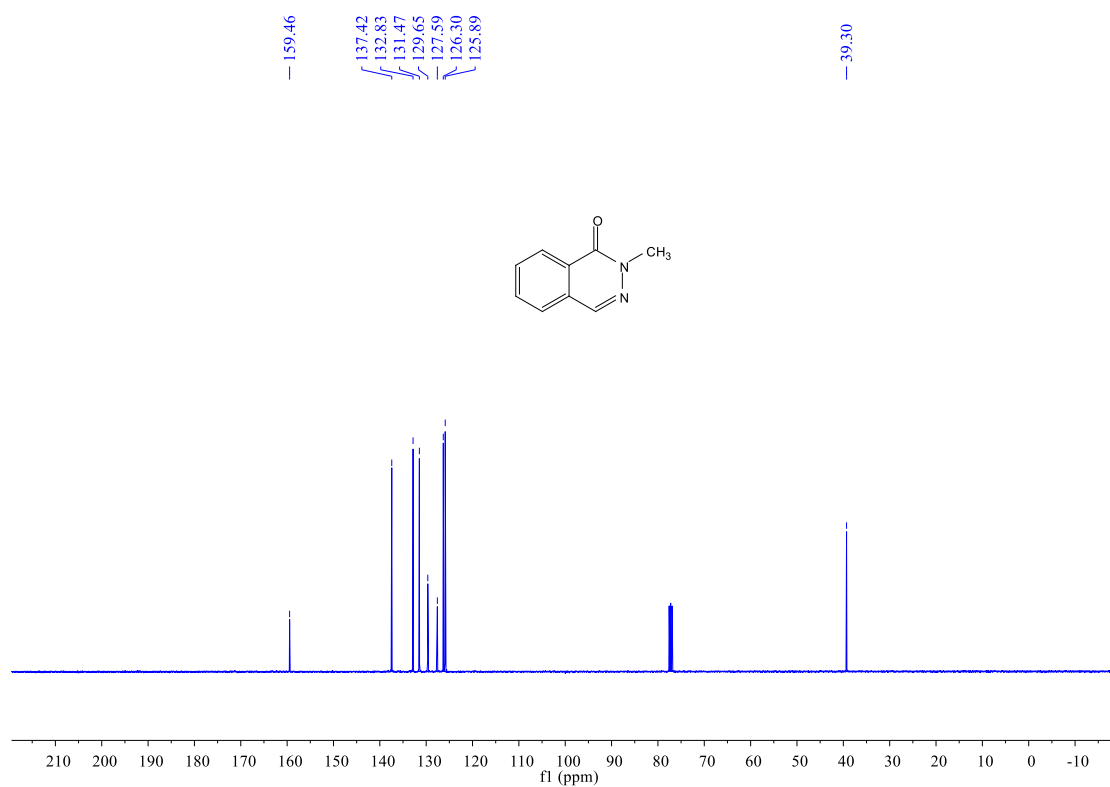

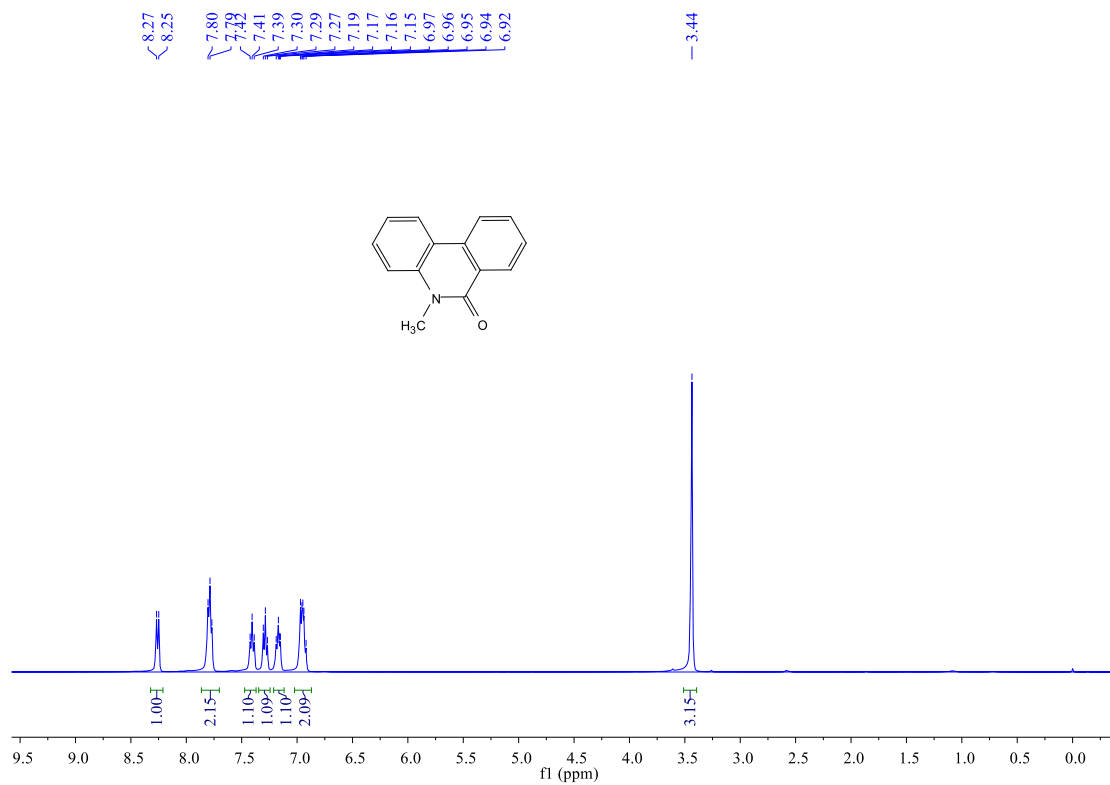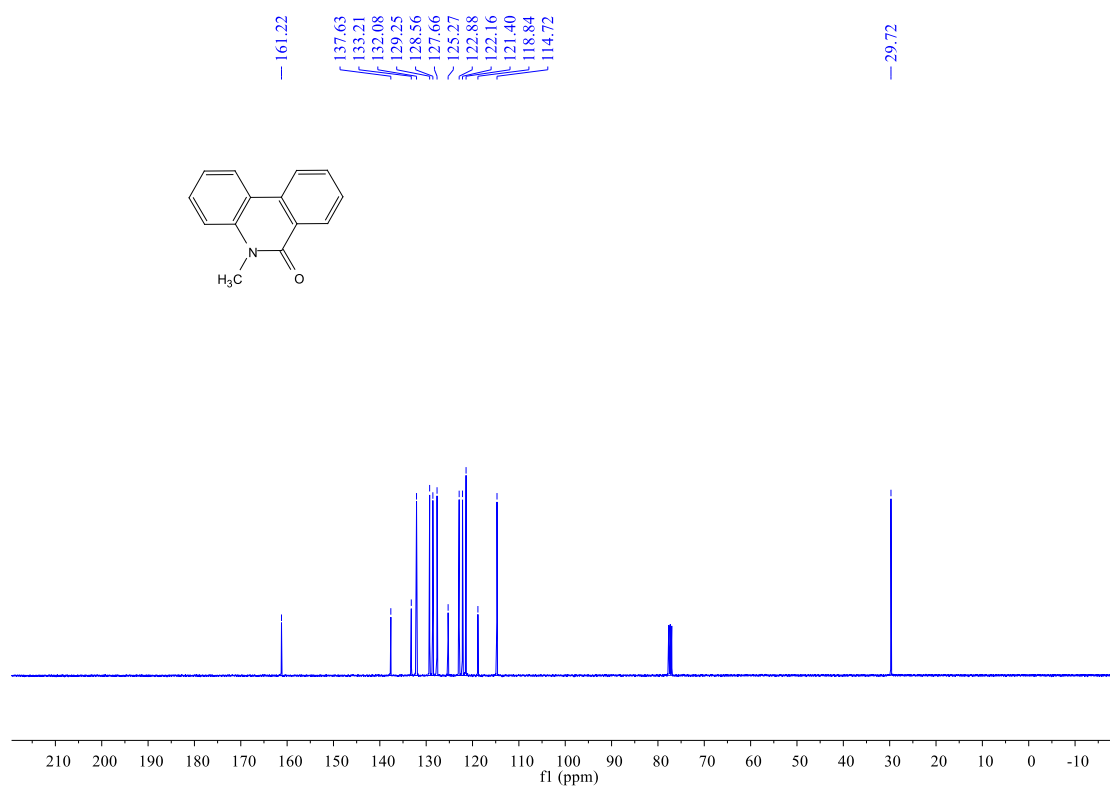



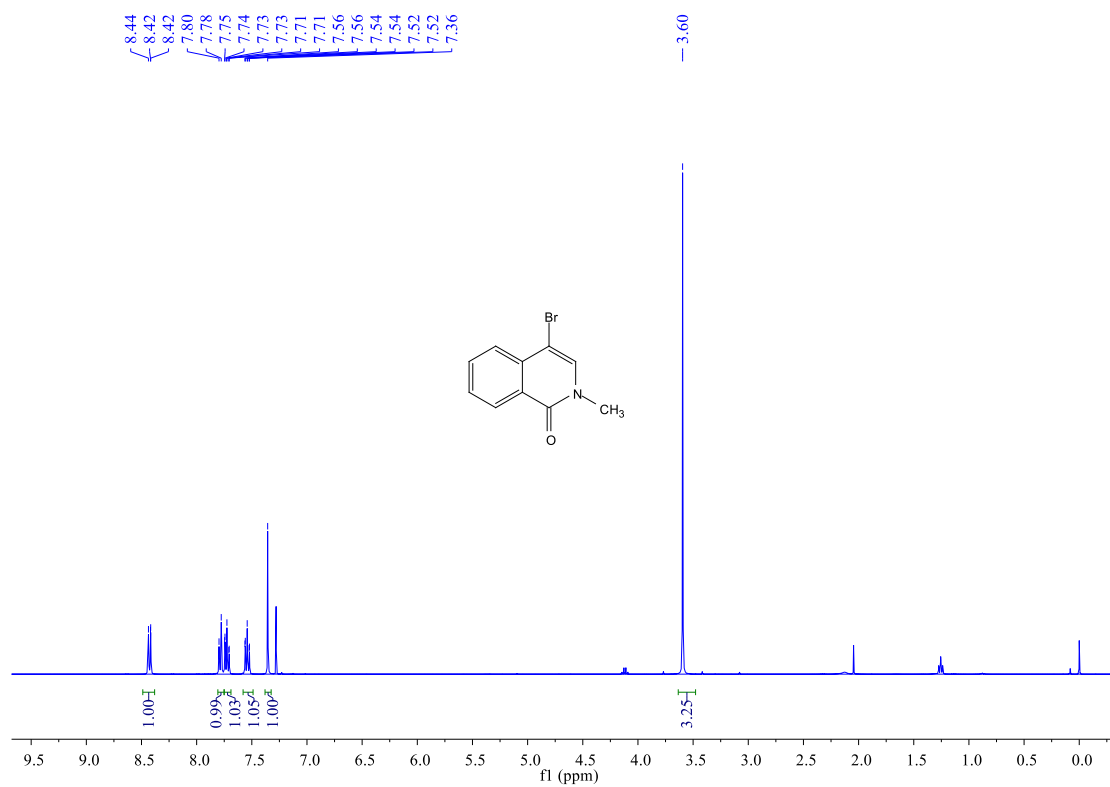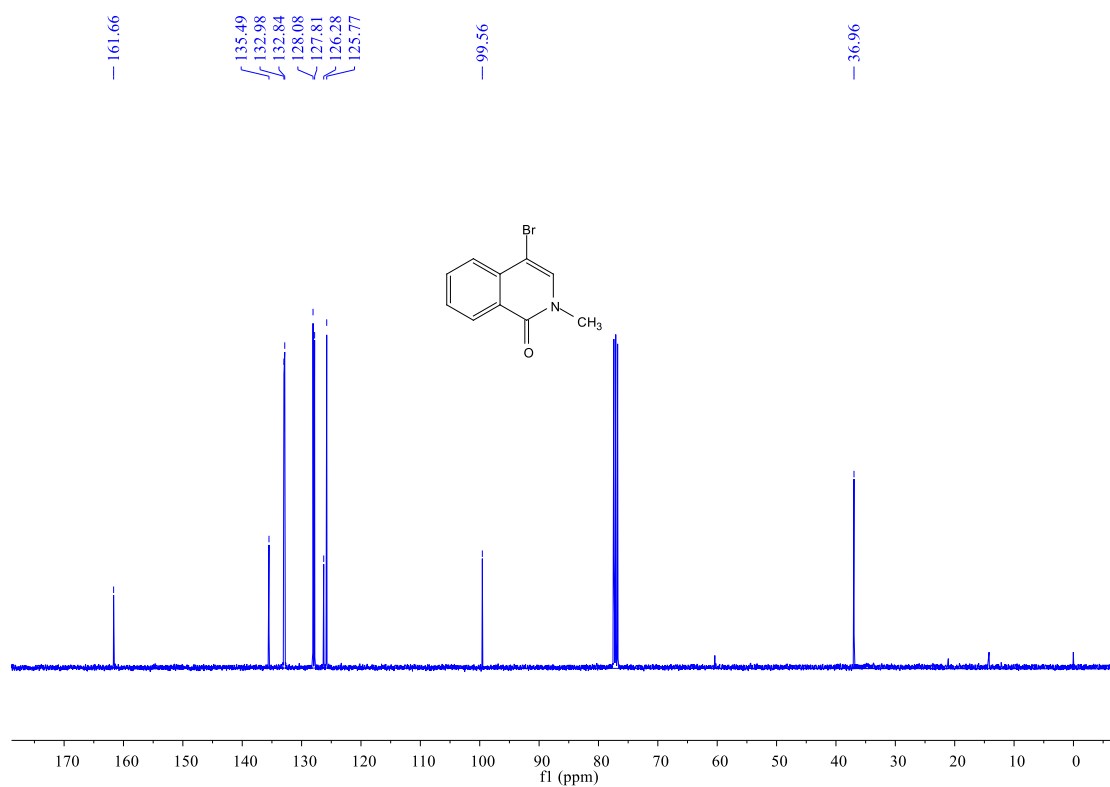

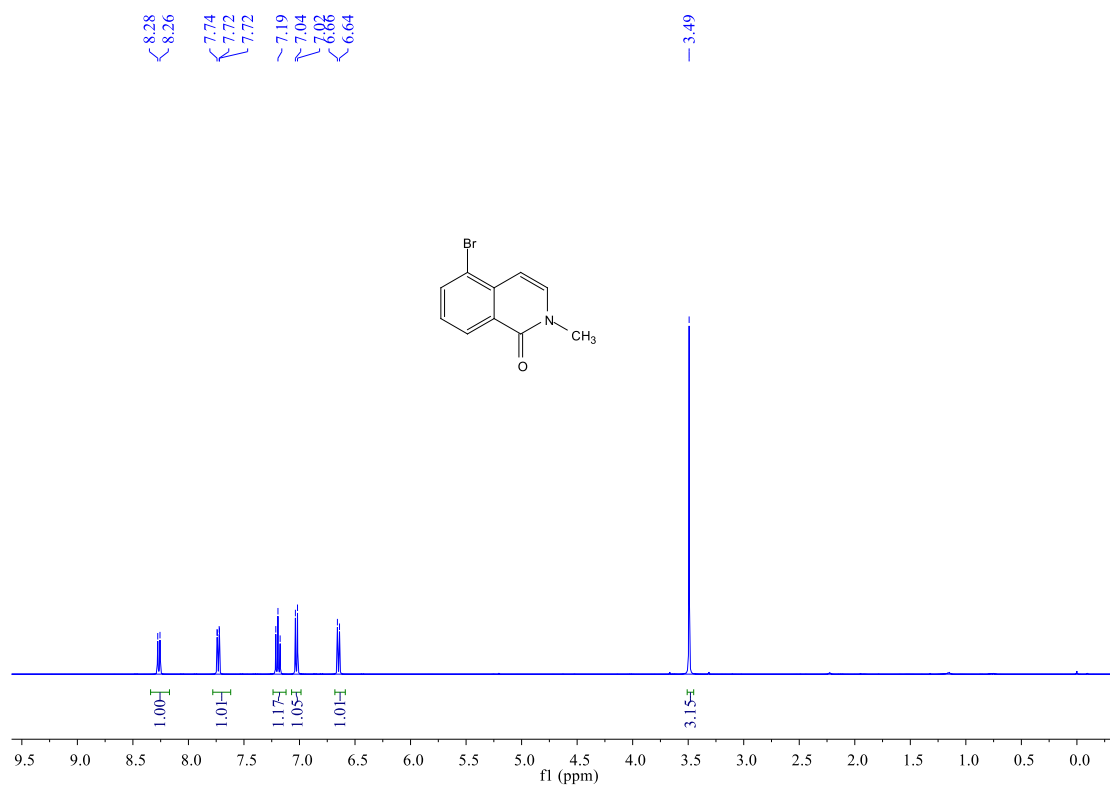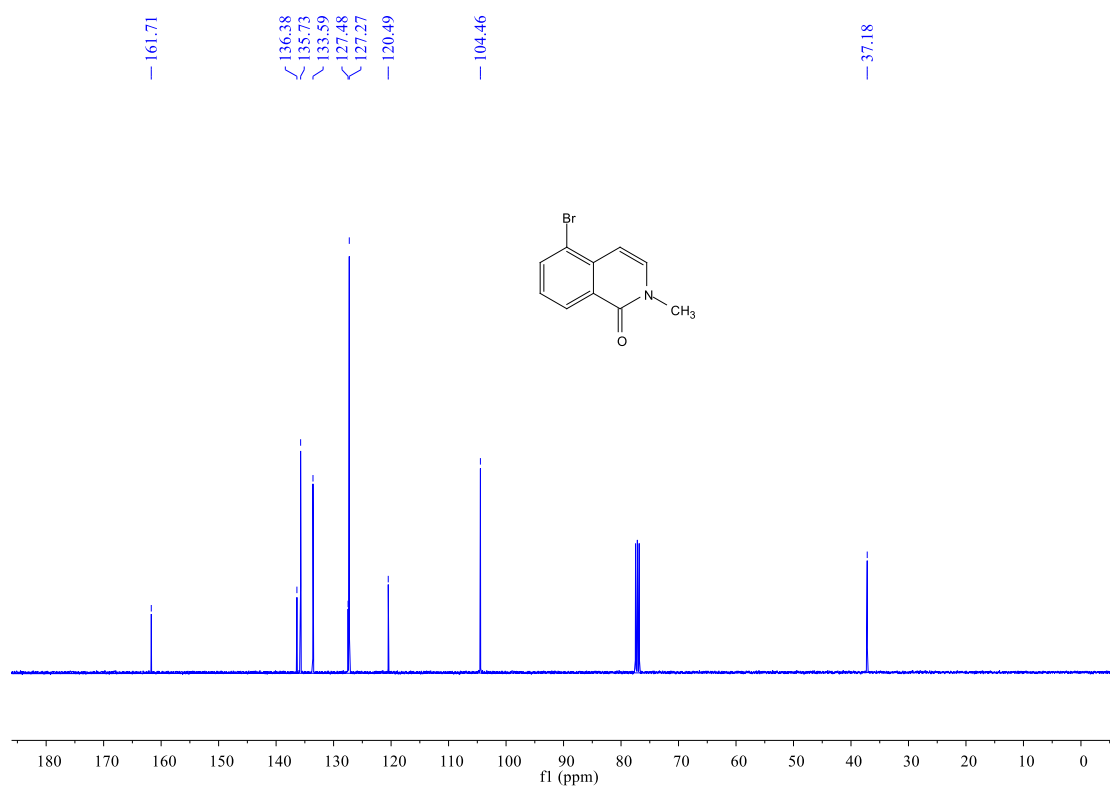

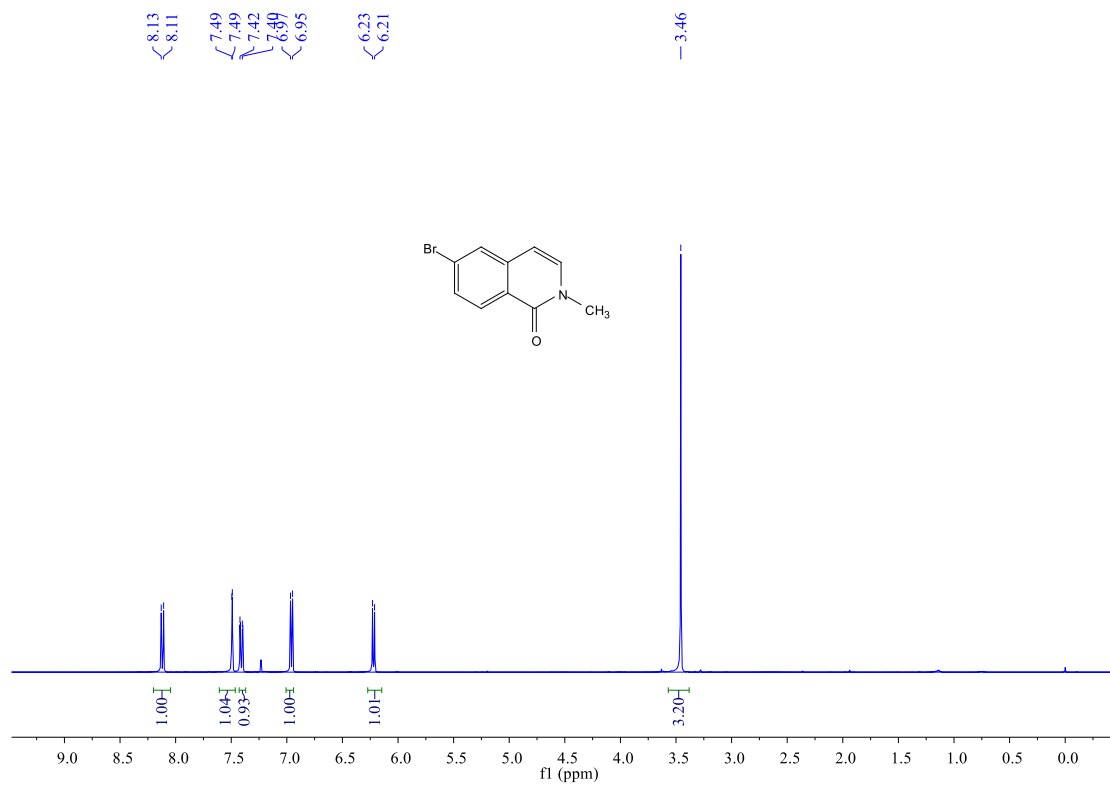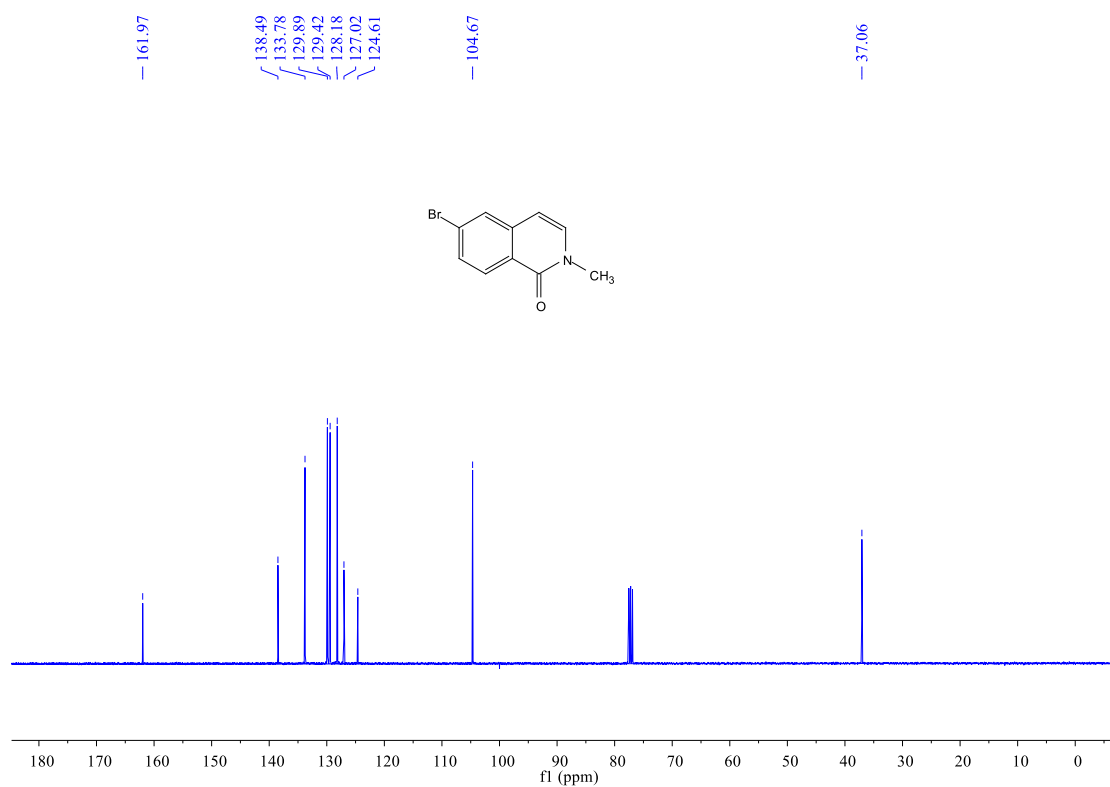

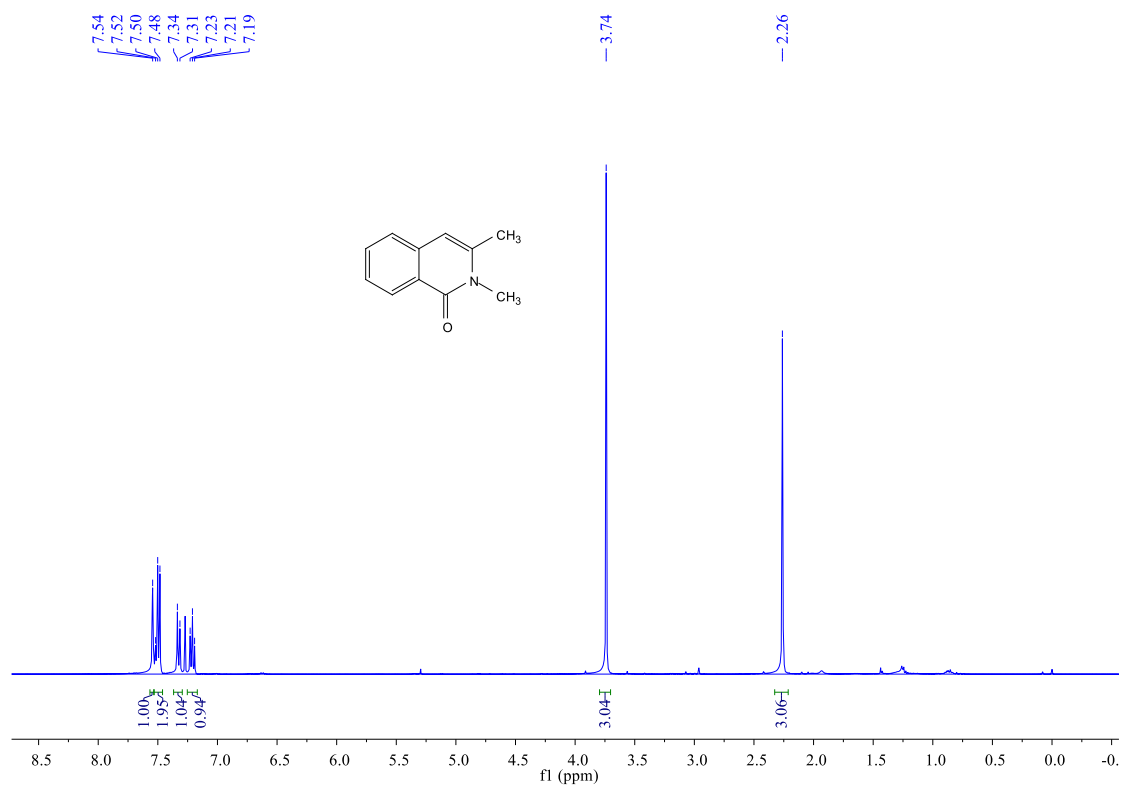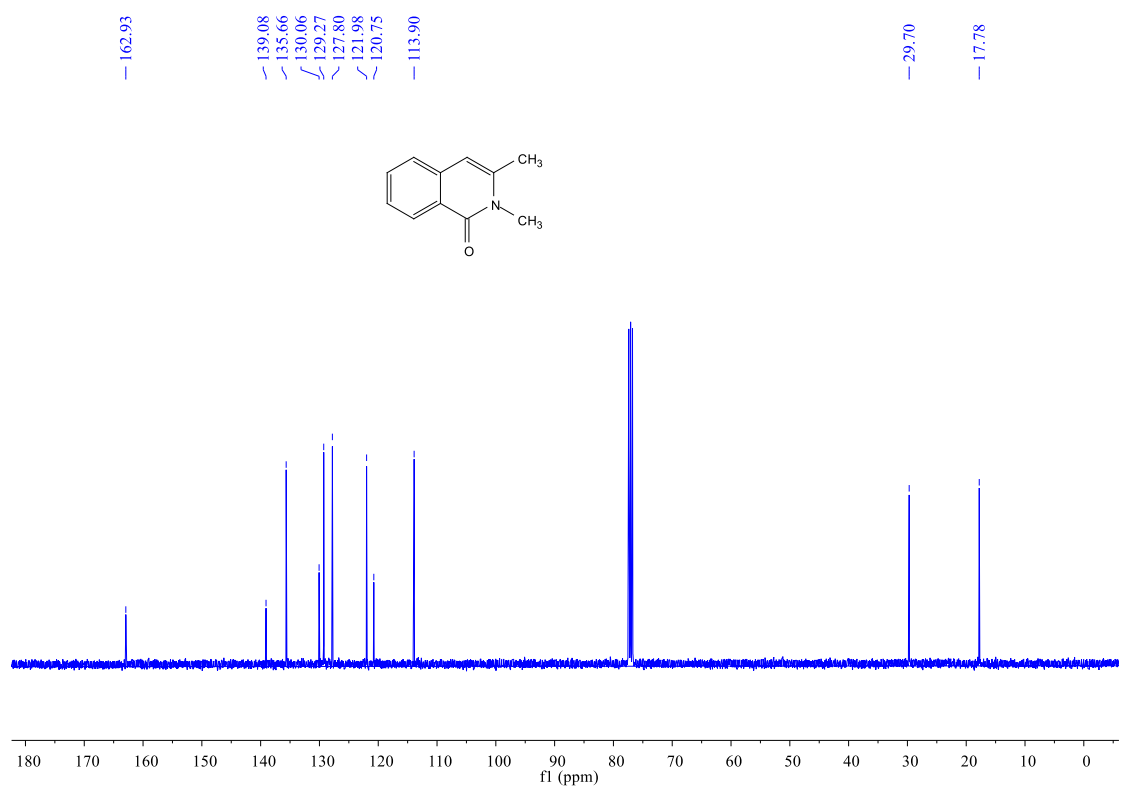

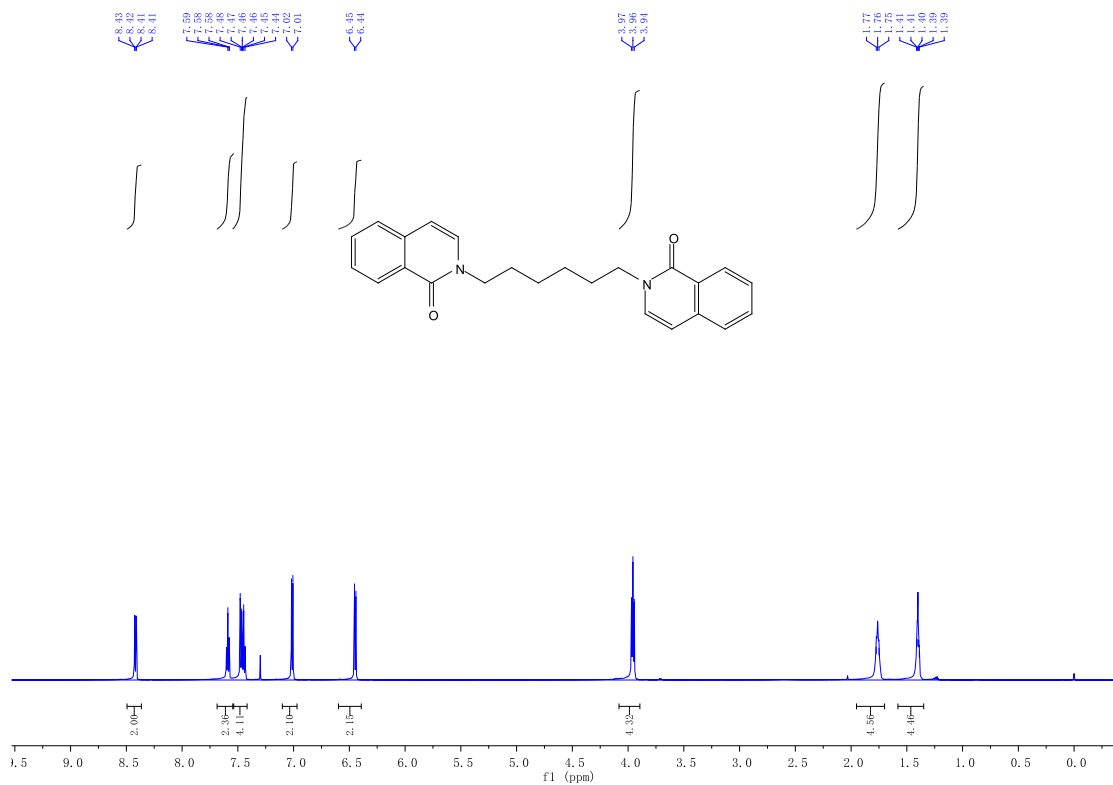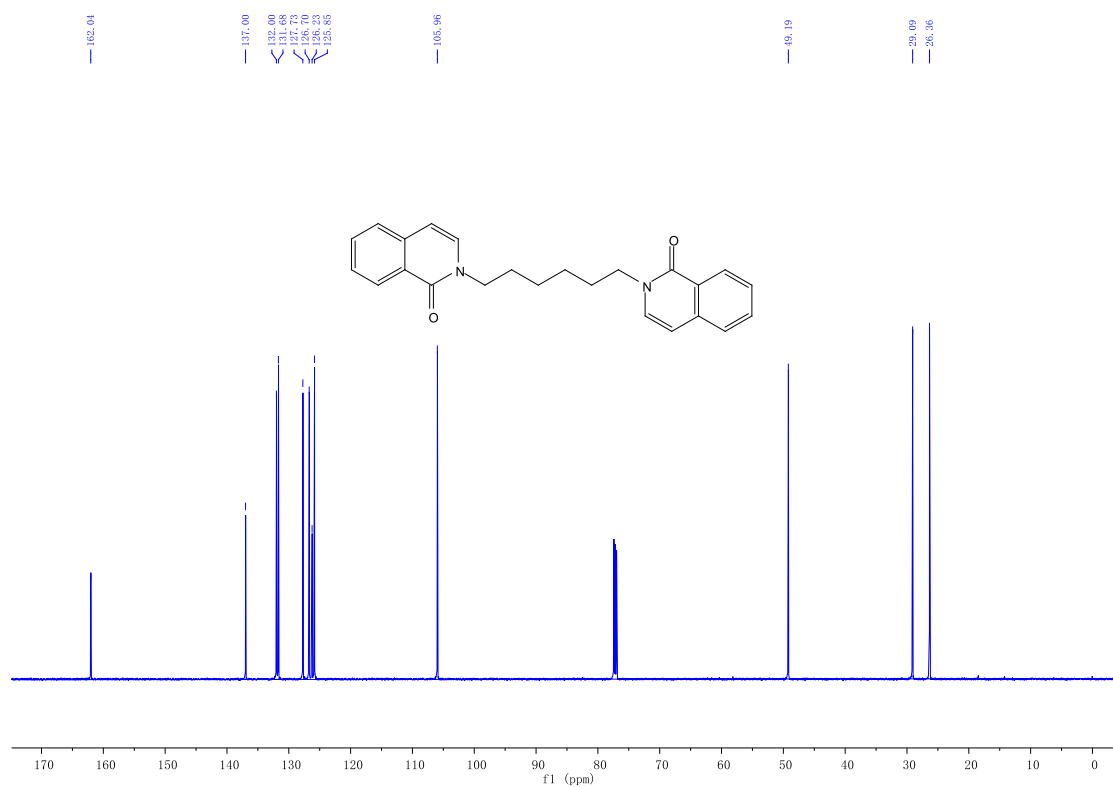

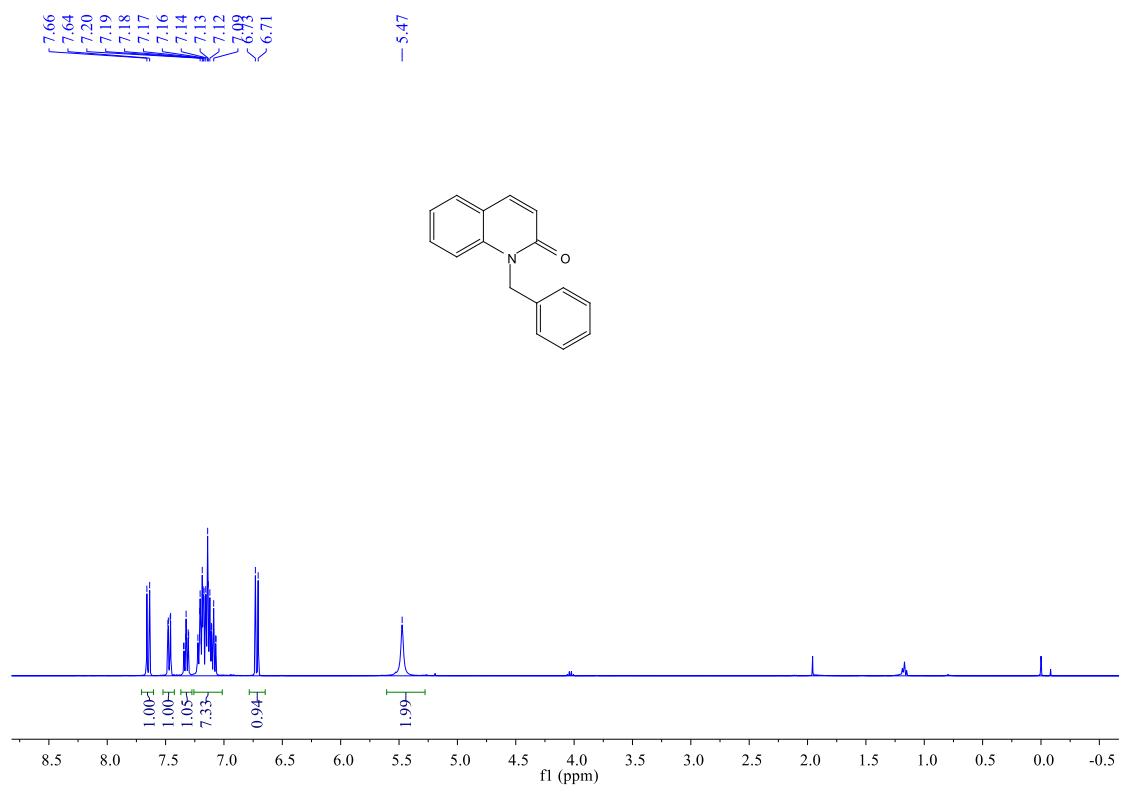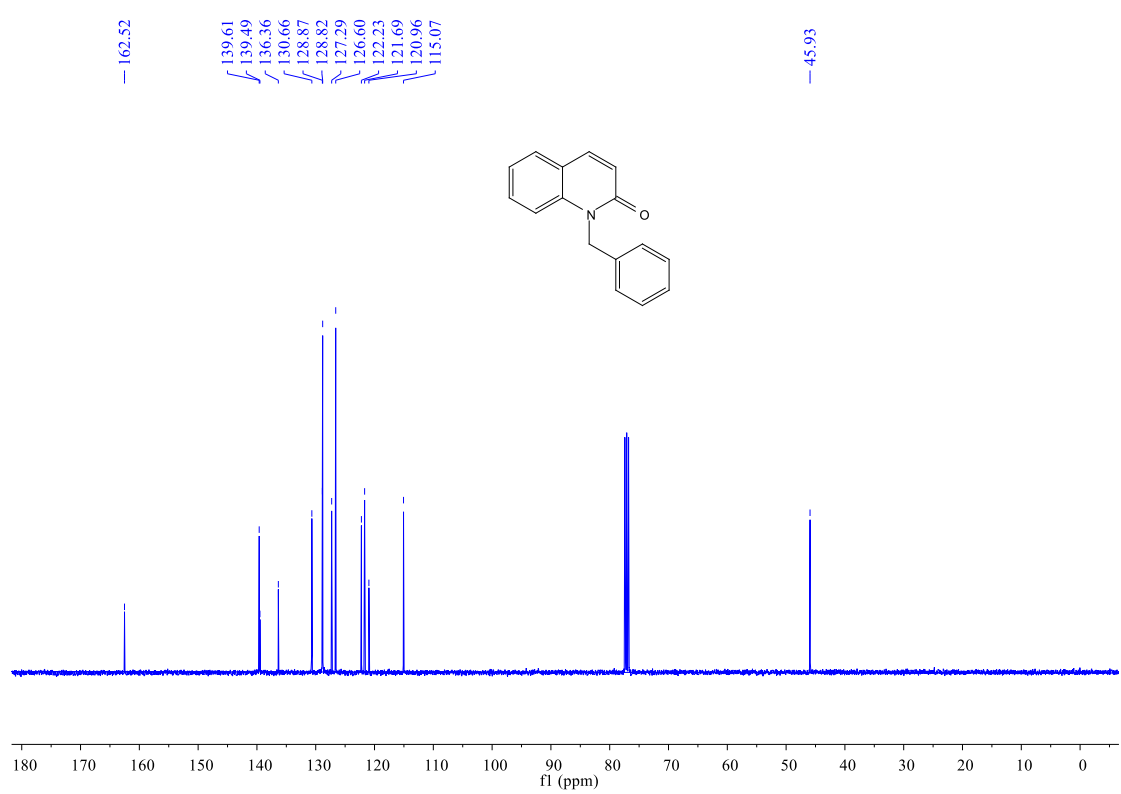

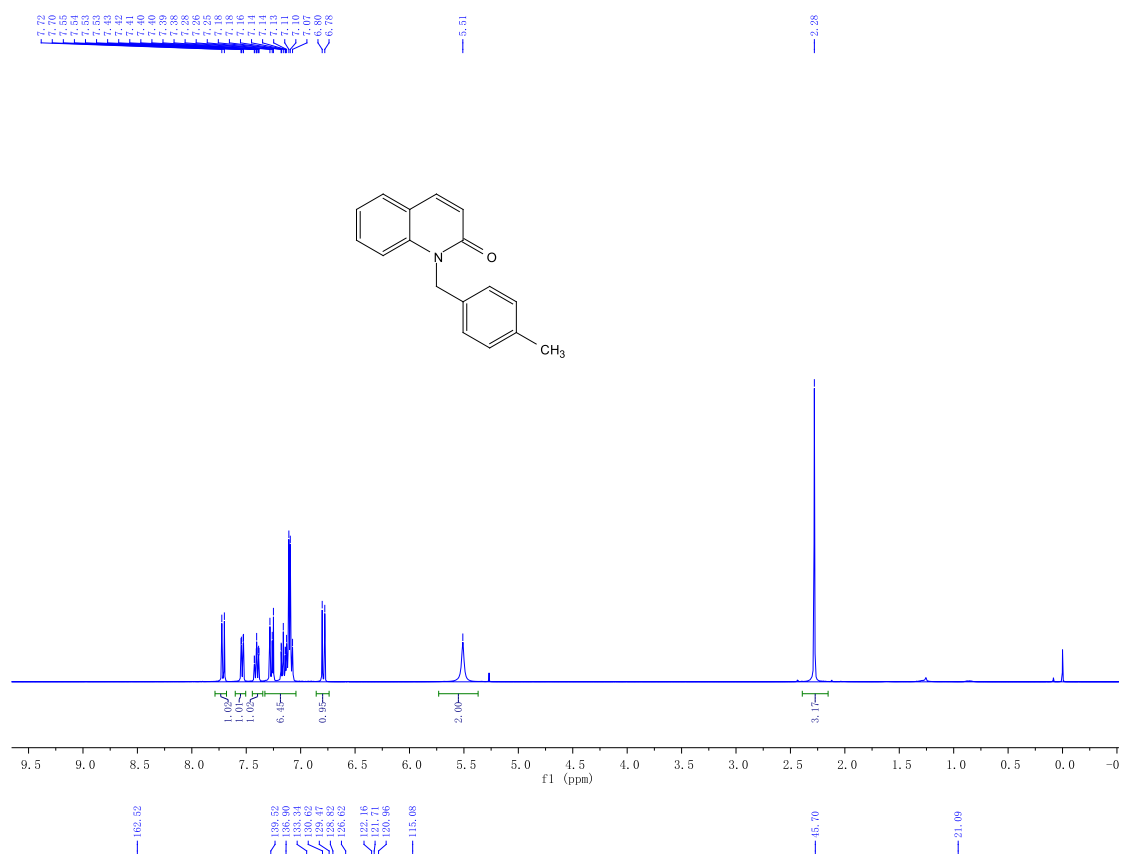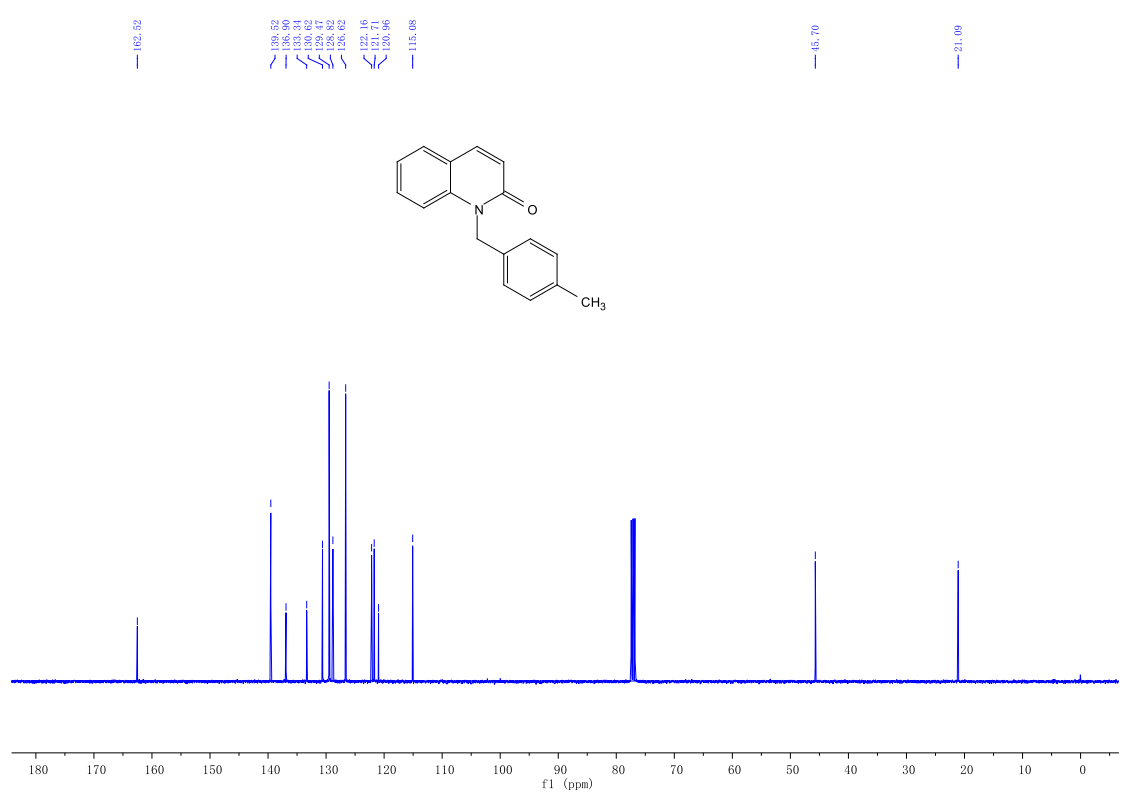

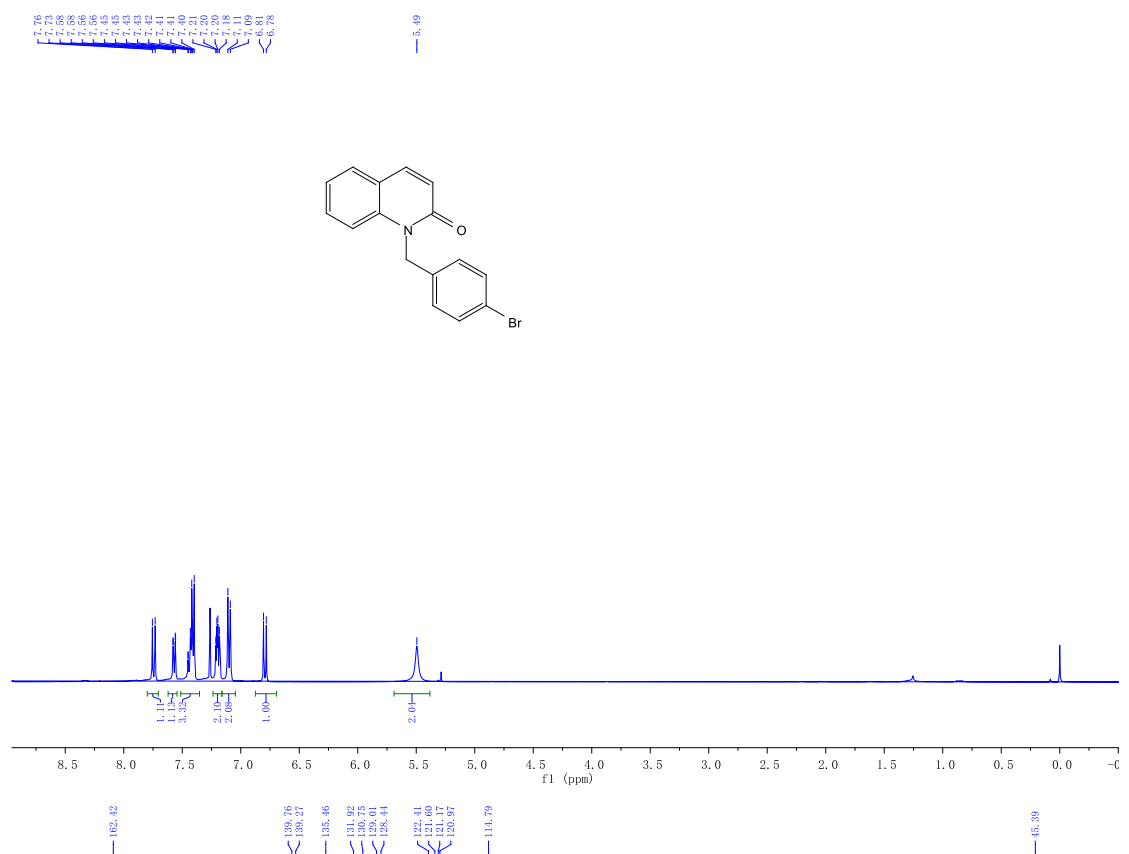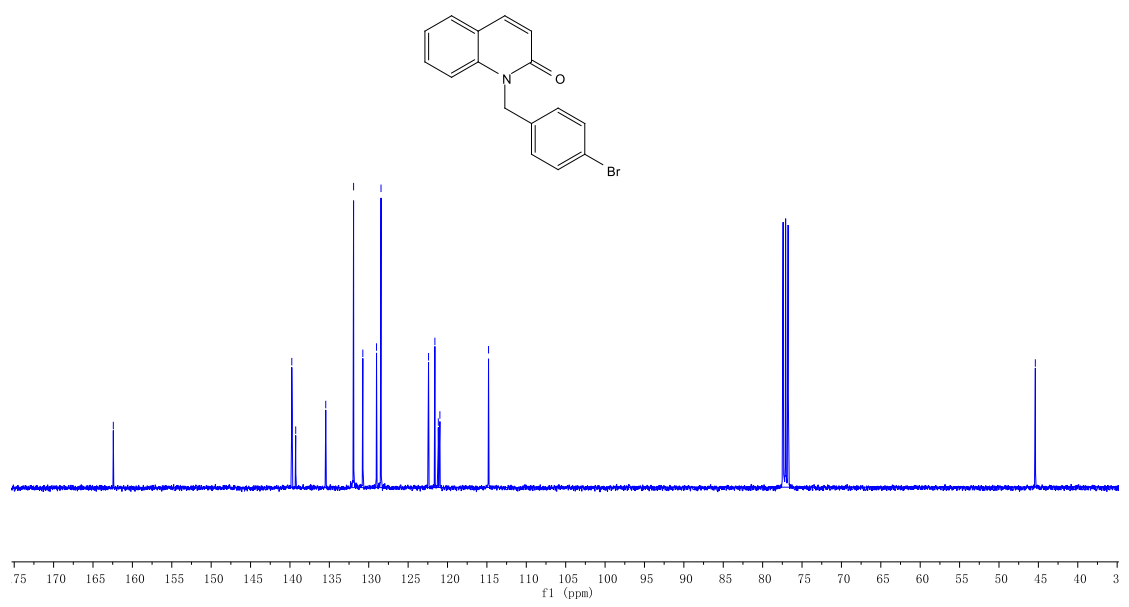



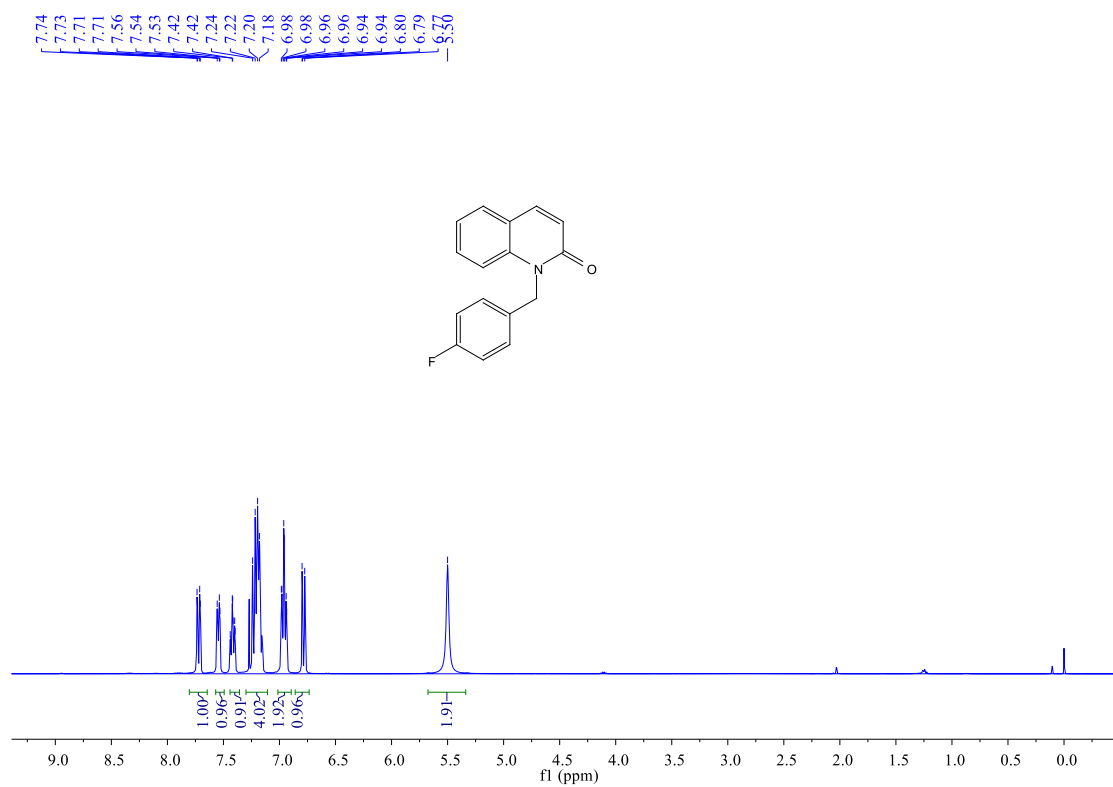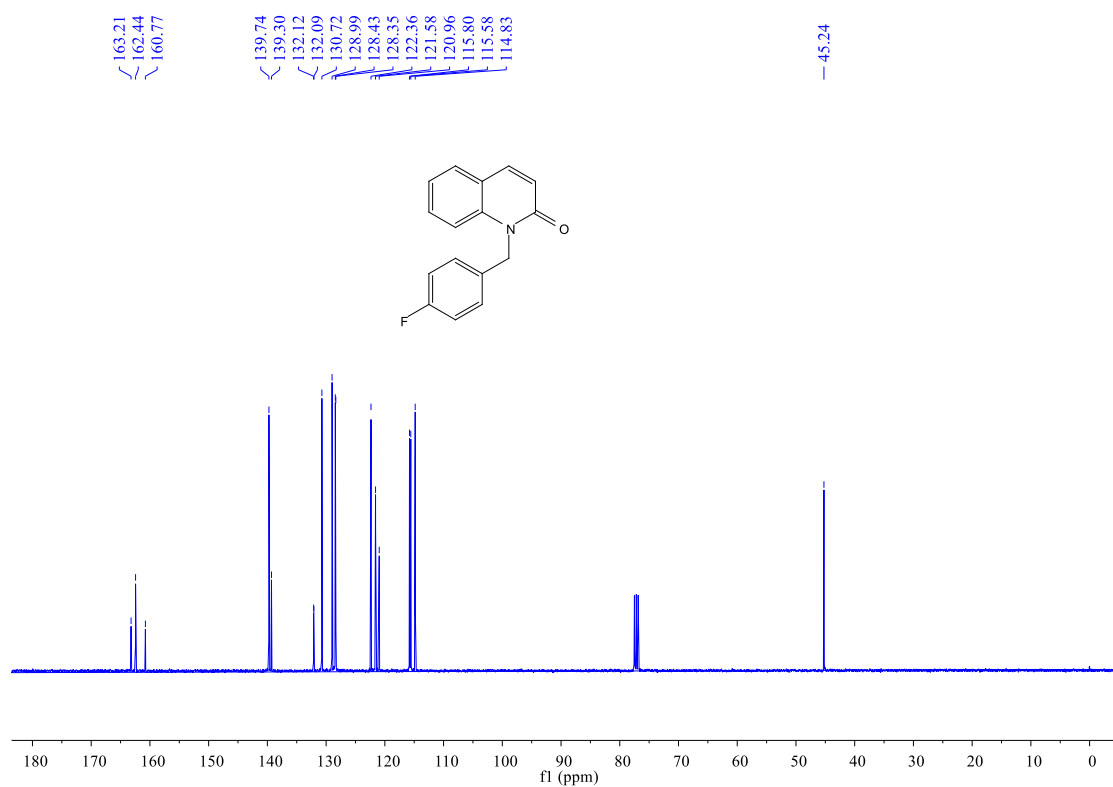



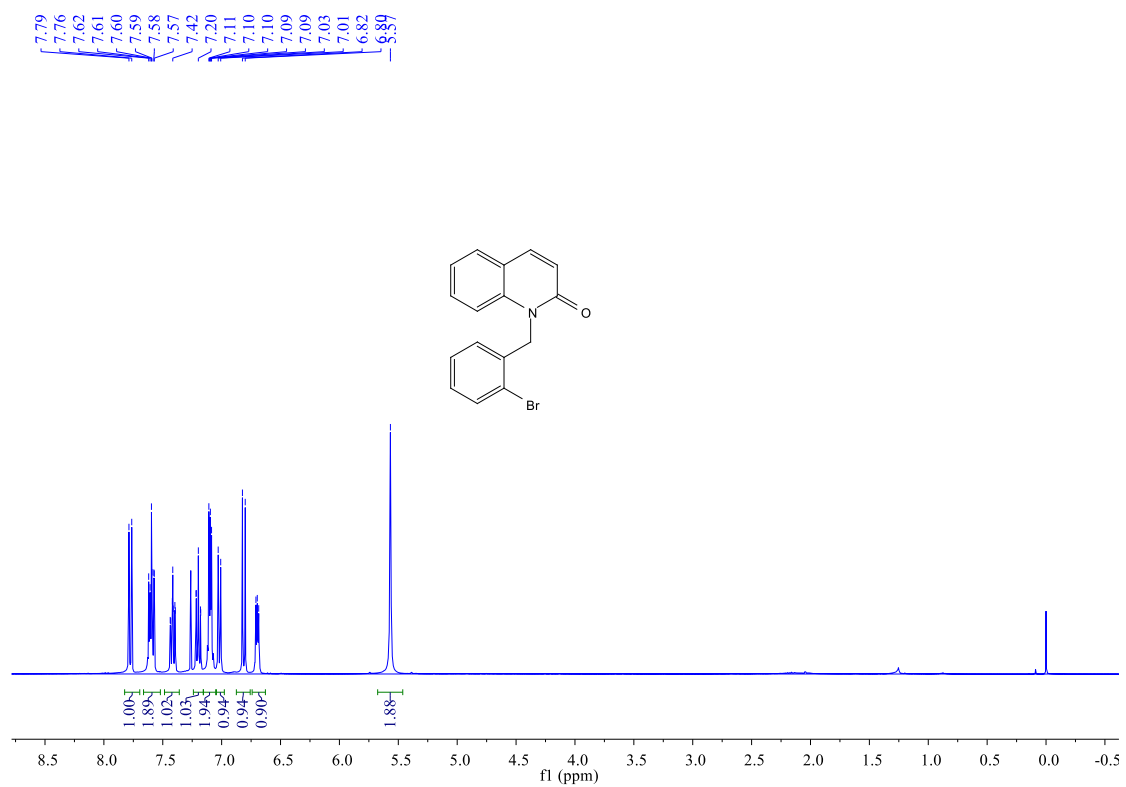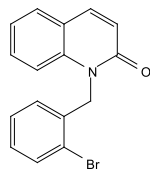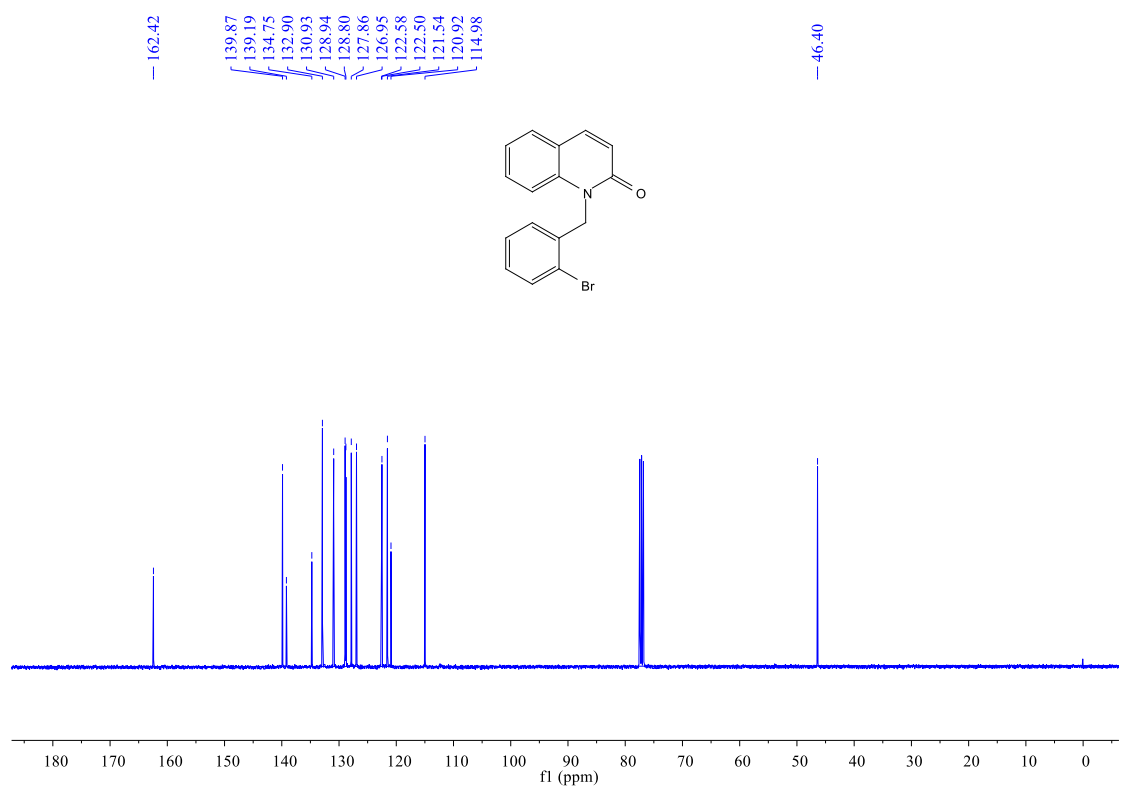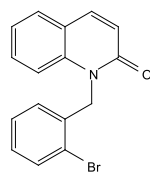

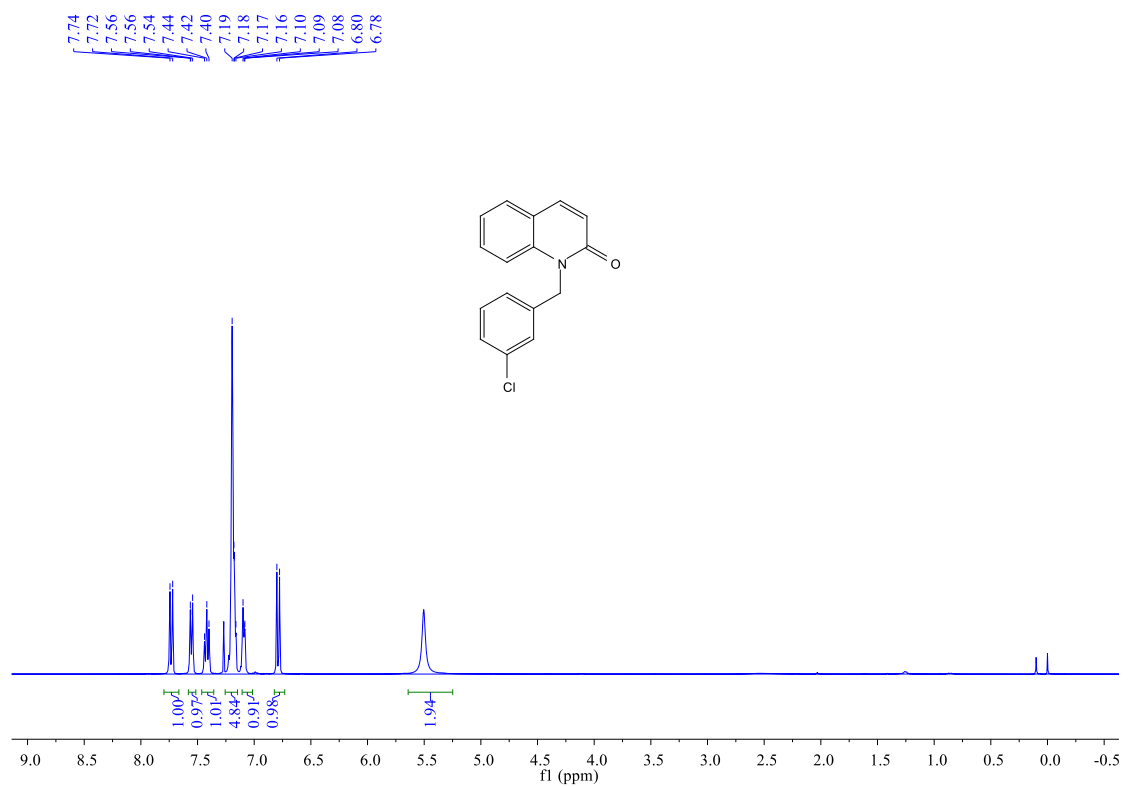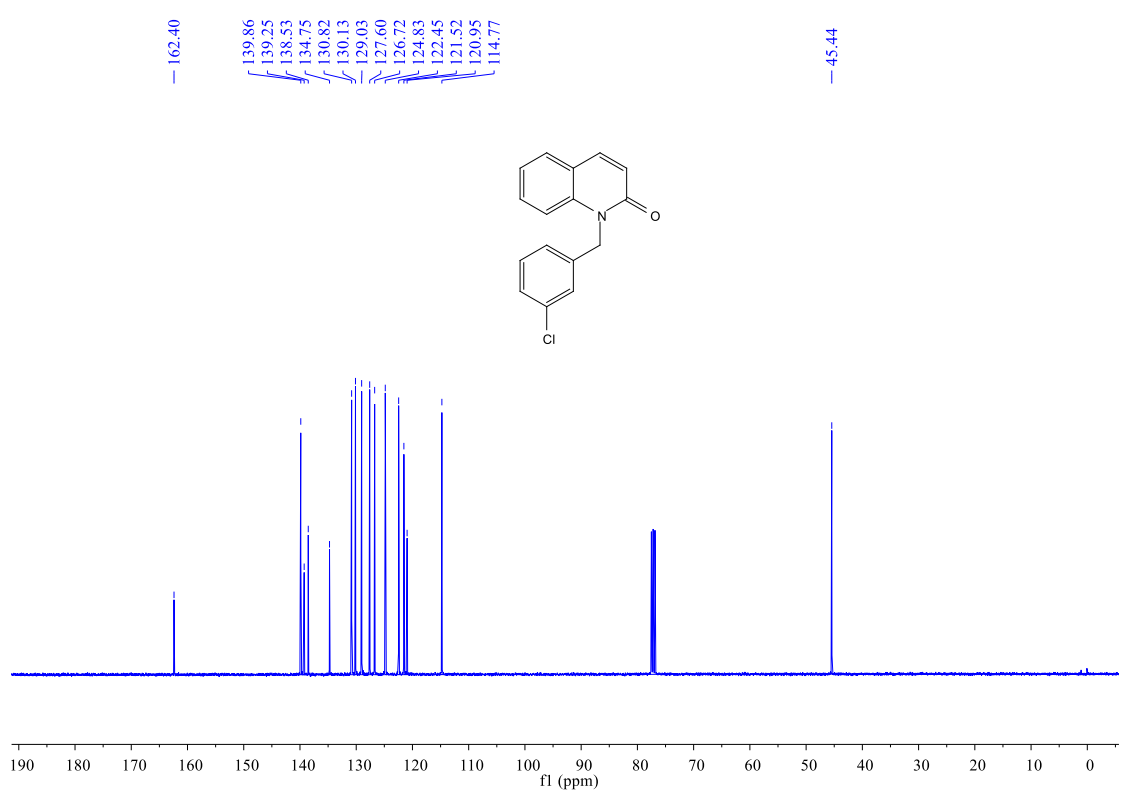

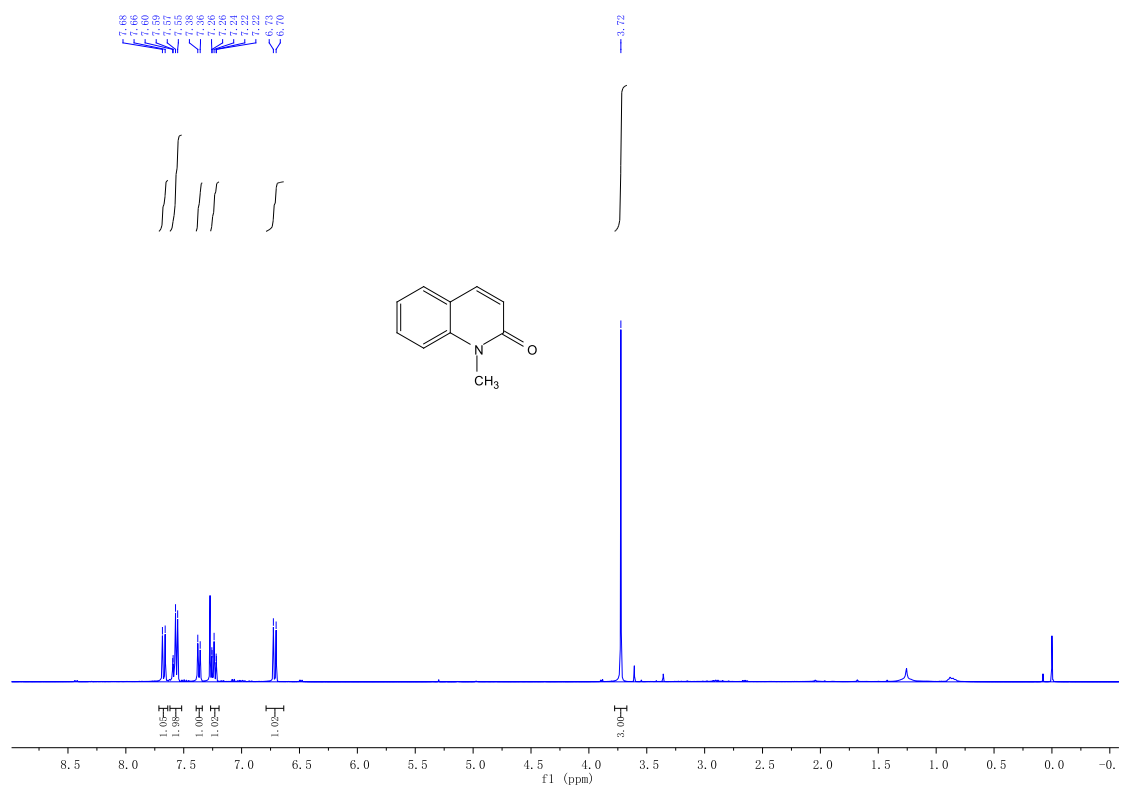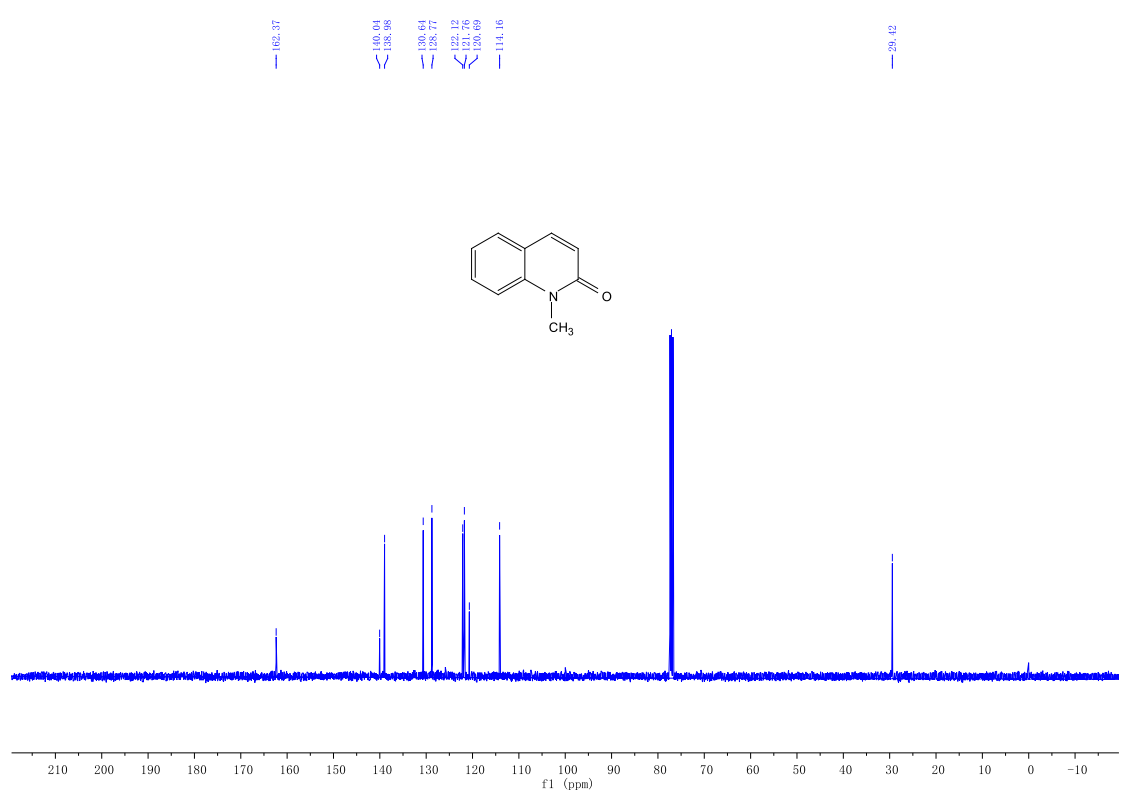



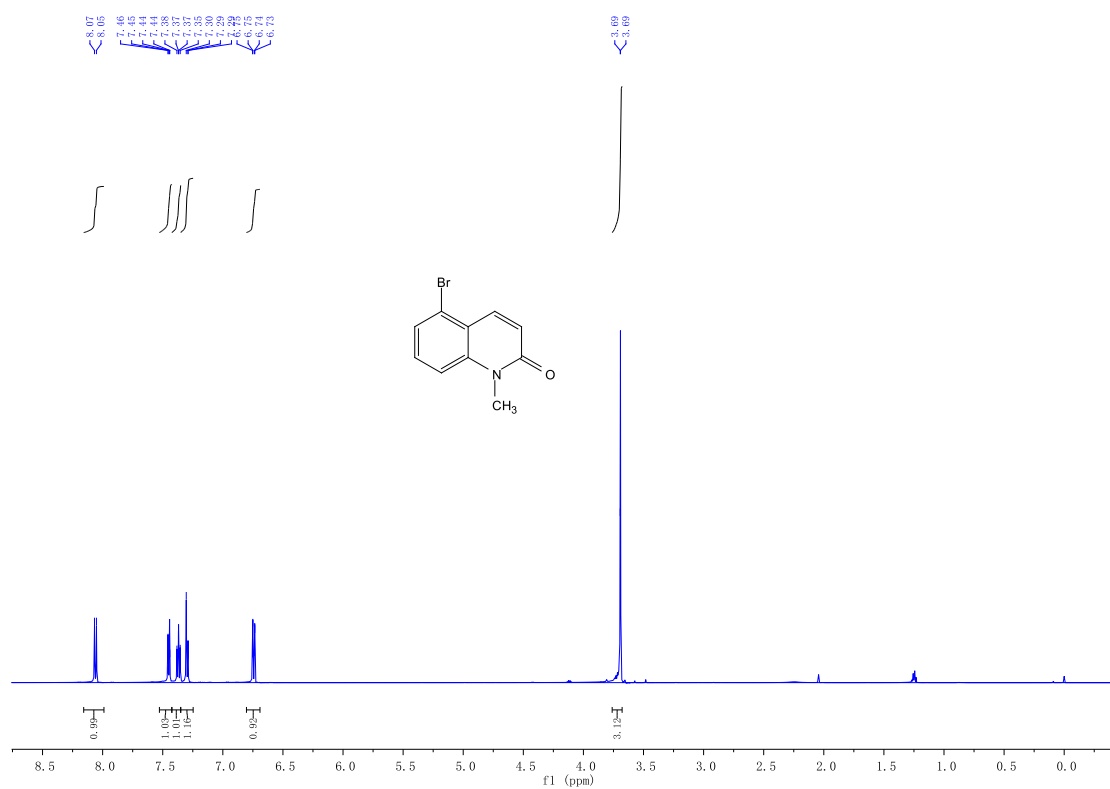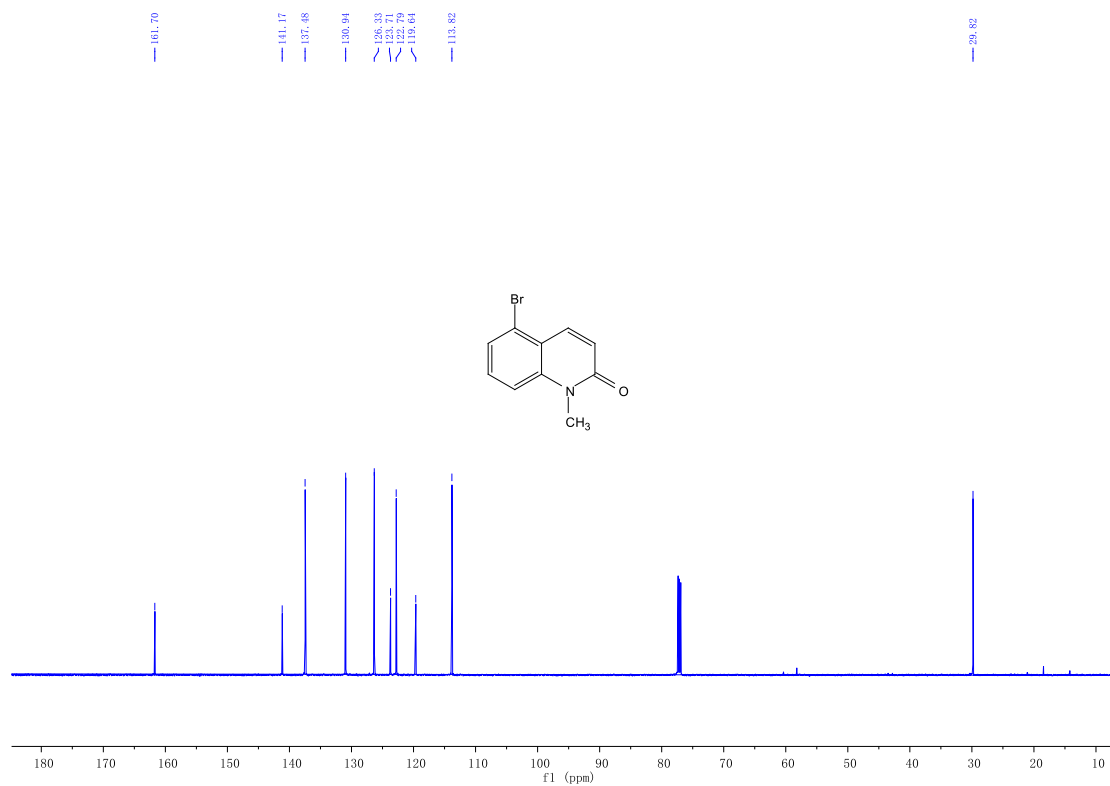

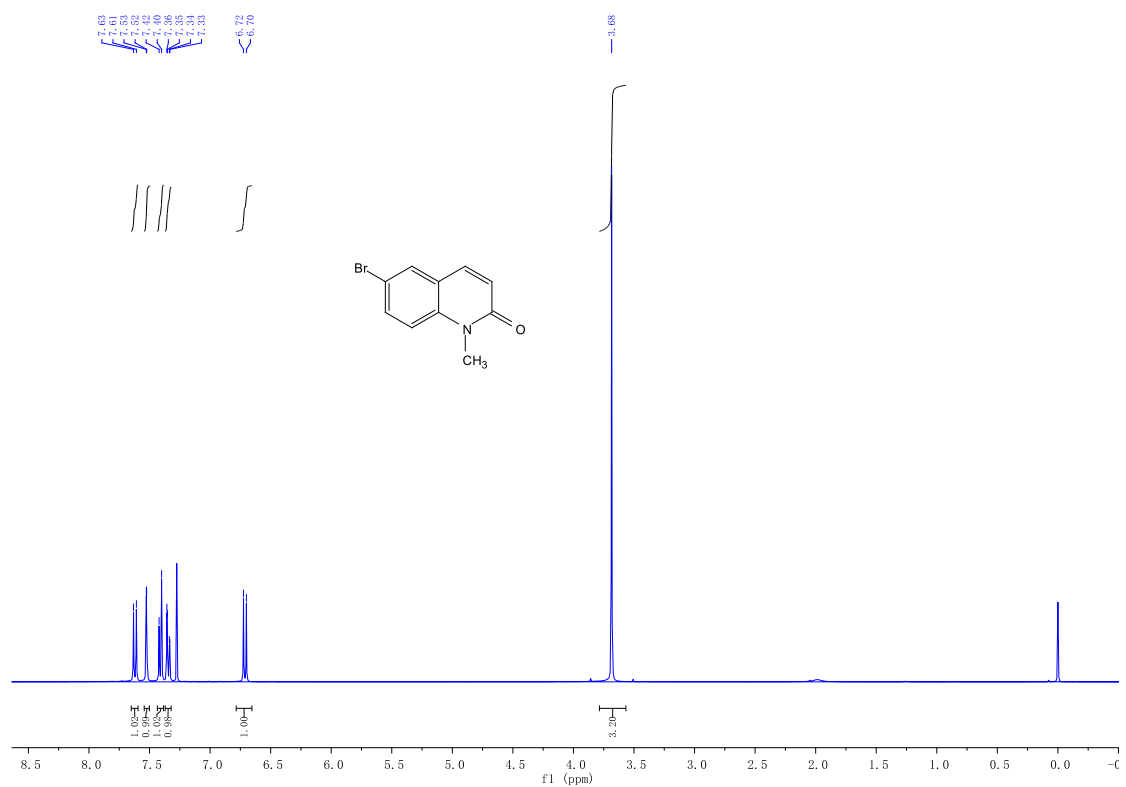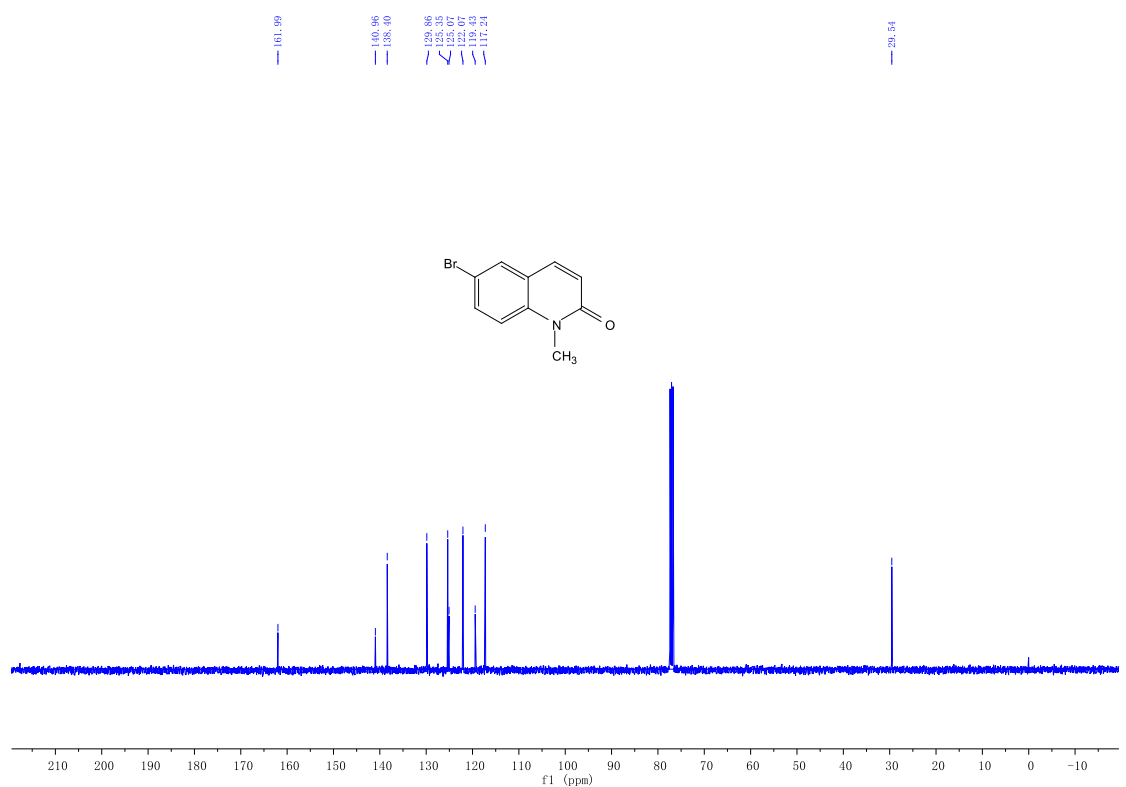



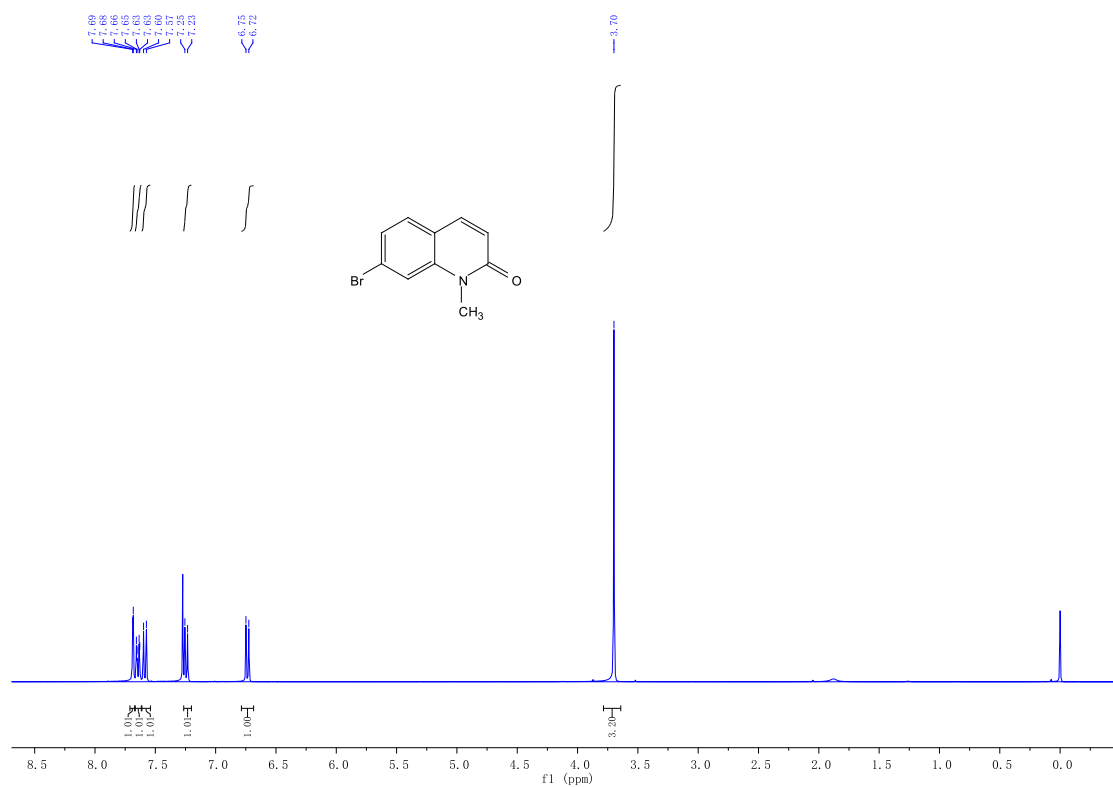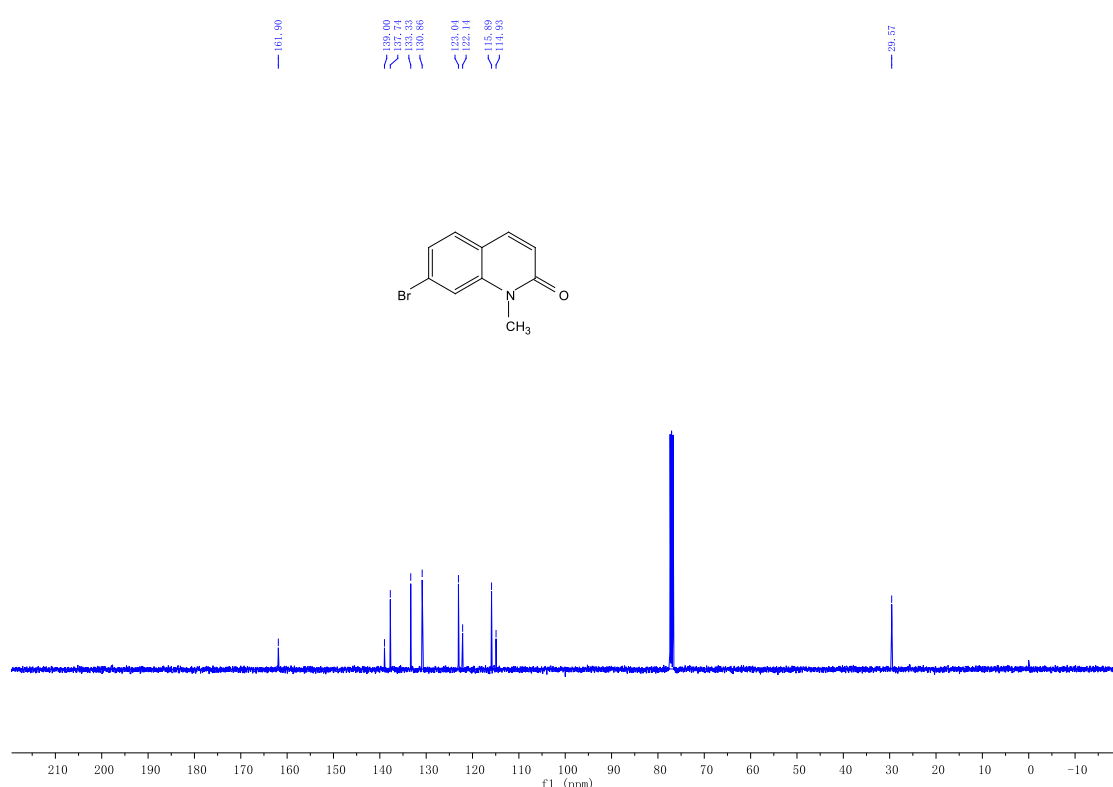

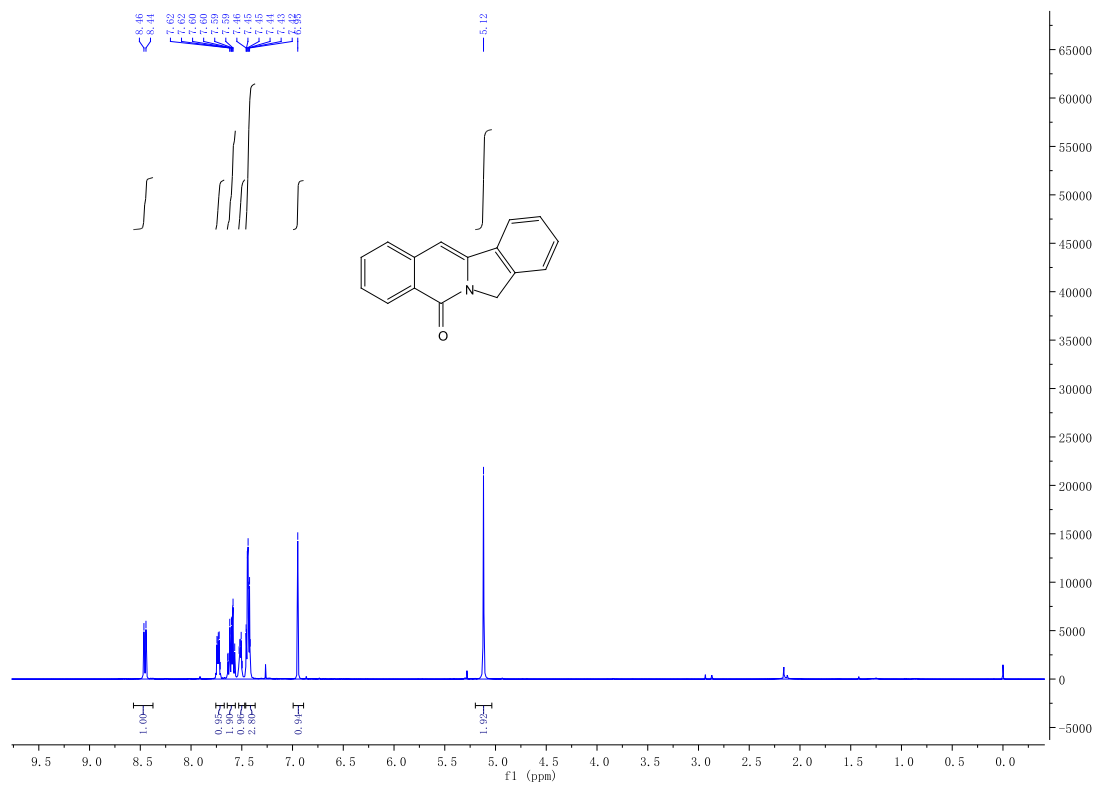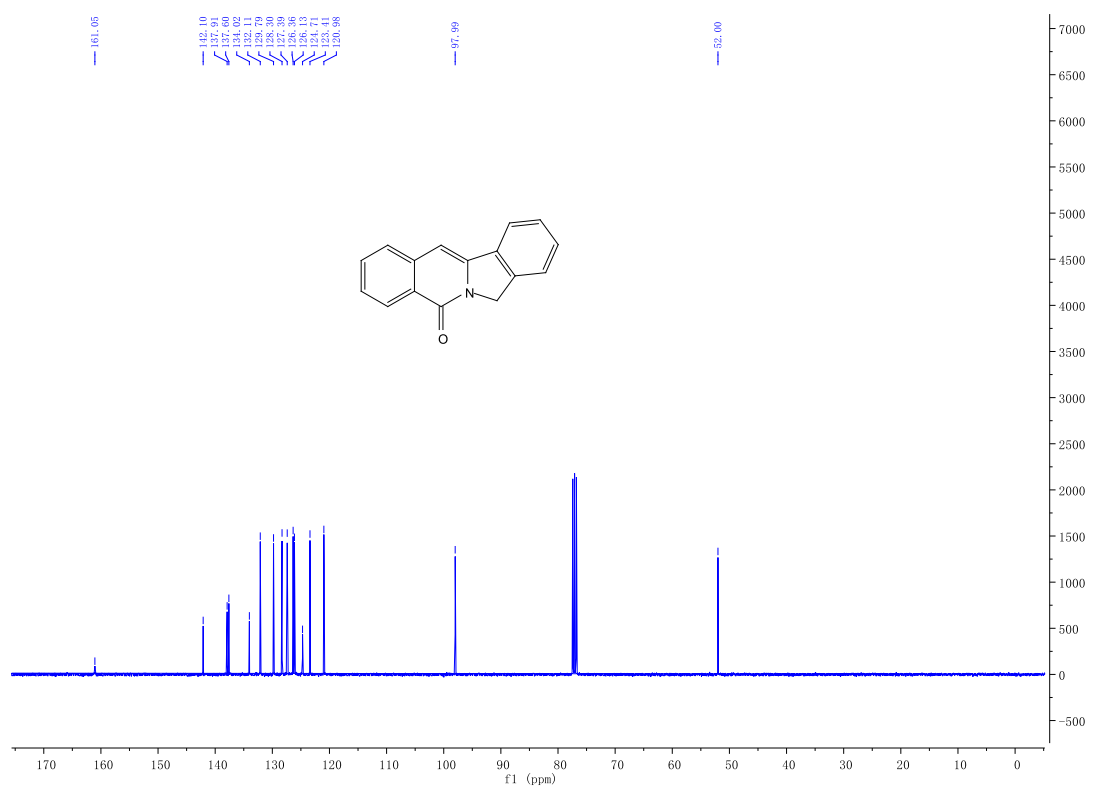

Supplement: d2nj06140f1.pdf [file d2nj06140f1.pdf]
